# Supplementary material for: Design, synthesis, and docking studies of novel pyrazole-based scaffolds and their evaluation as VEGFR2 inhibitors in the treatment of prostate cancer
Source: Royal Society of Chemistry journal article supplement (doi:10.1039/d3ra02579a), 2023-01-01
Supplement: d3ra02579a1.pdf [file d3ra02579a1.pdf]

## Design, Synthesis, Docking Studies of Novel Pyrazole-based Scaffolds and Their Evaluation as VEGFR2 Inhibitors in the Treatment of Prostate Cancer.

Dalia H. Soliman<sup>1,2</sup> and Mohamed S. Nafie<sup>3</sup>

<sup>1</sup>Department of Pharmaceutical Medicinal Chemistry and Drug Design, Faculty of Pharmacy (Girls), Al-Azhar University,

<sup>2</sup>Department of Pharmaceutical Chemistry, Faculty of Pharmacy, Egyptian Russian University, Badr City, Cairo, Egypt; [dalia-soliman@eru.edu.eg](mailto:dalia-soliman@eru.edu.eg)

<sup>3</sup>Department of Chemistry (Biochemistry program), Faculty of Science, Suez Canal University, Ismailia 41522, Egypt; [mohamed\\_nafie@science.suez.edu.eg](mailto:mohamed_nafie@science.suez.edu.eg)

### List of supplementary

| # | Content                                                                  |
|---|--------------------------------------------------------------------------|
| 1 | Supplementary characterization for the tested compounds<br>NMR, IR, Mass |
| 2 | Figure S1 & S2 (Docking part)                                            |
| 3 | Detailed methodology for the in vivo experiment.                         |

mai-adel-3a.1.fid

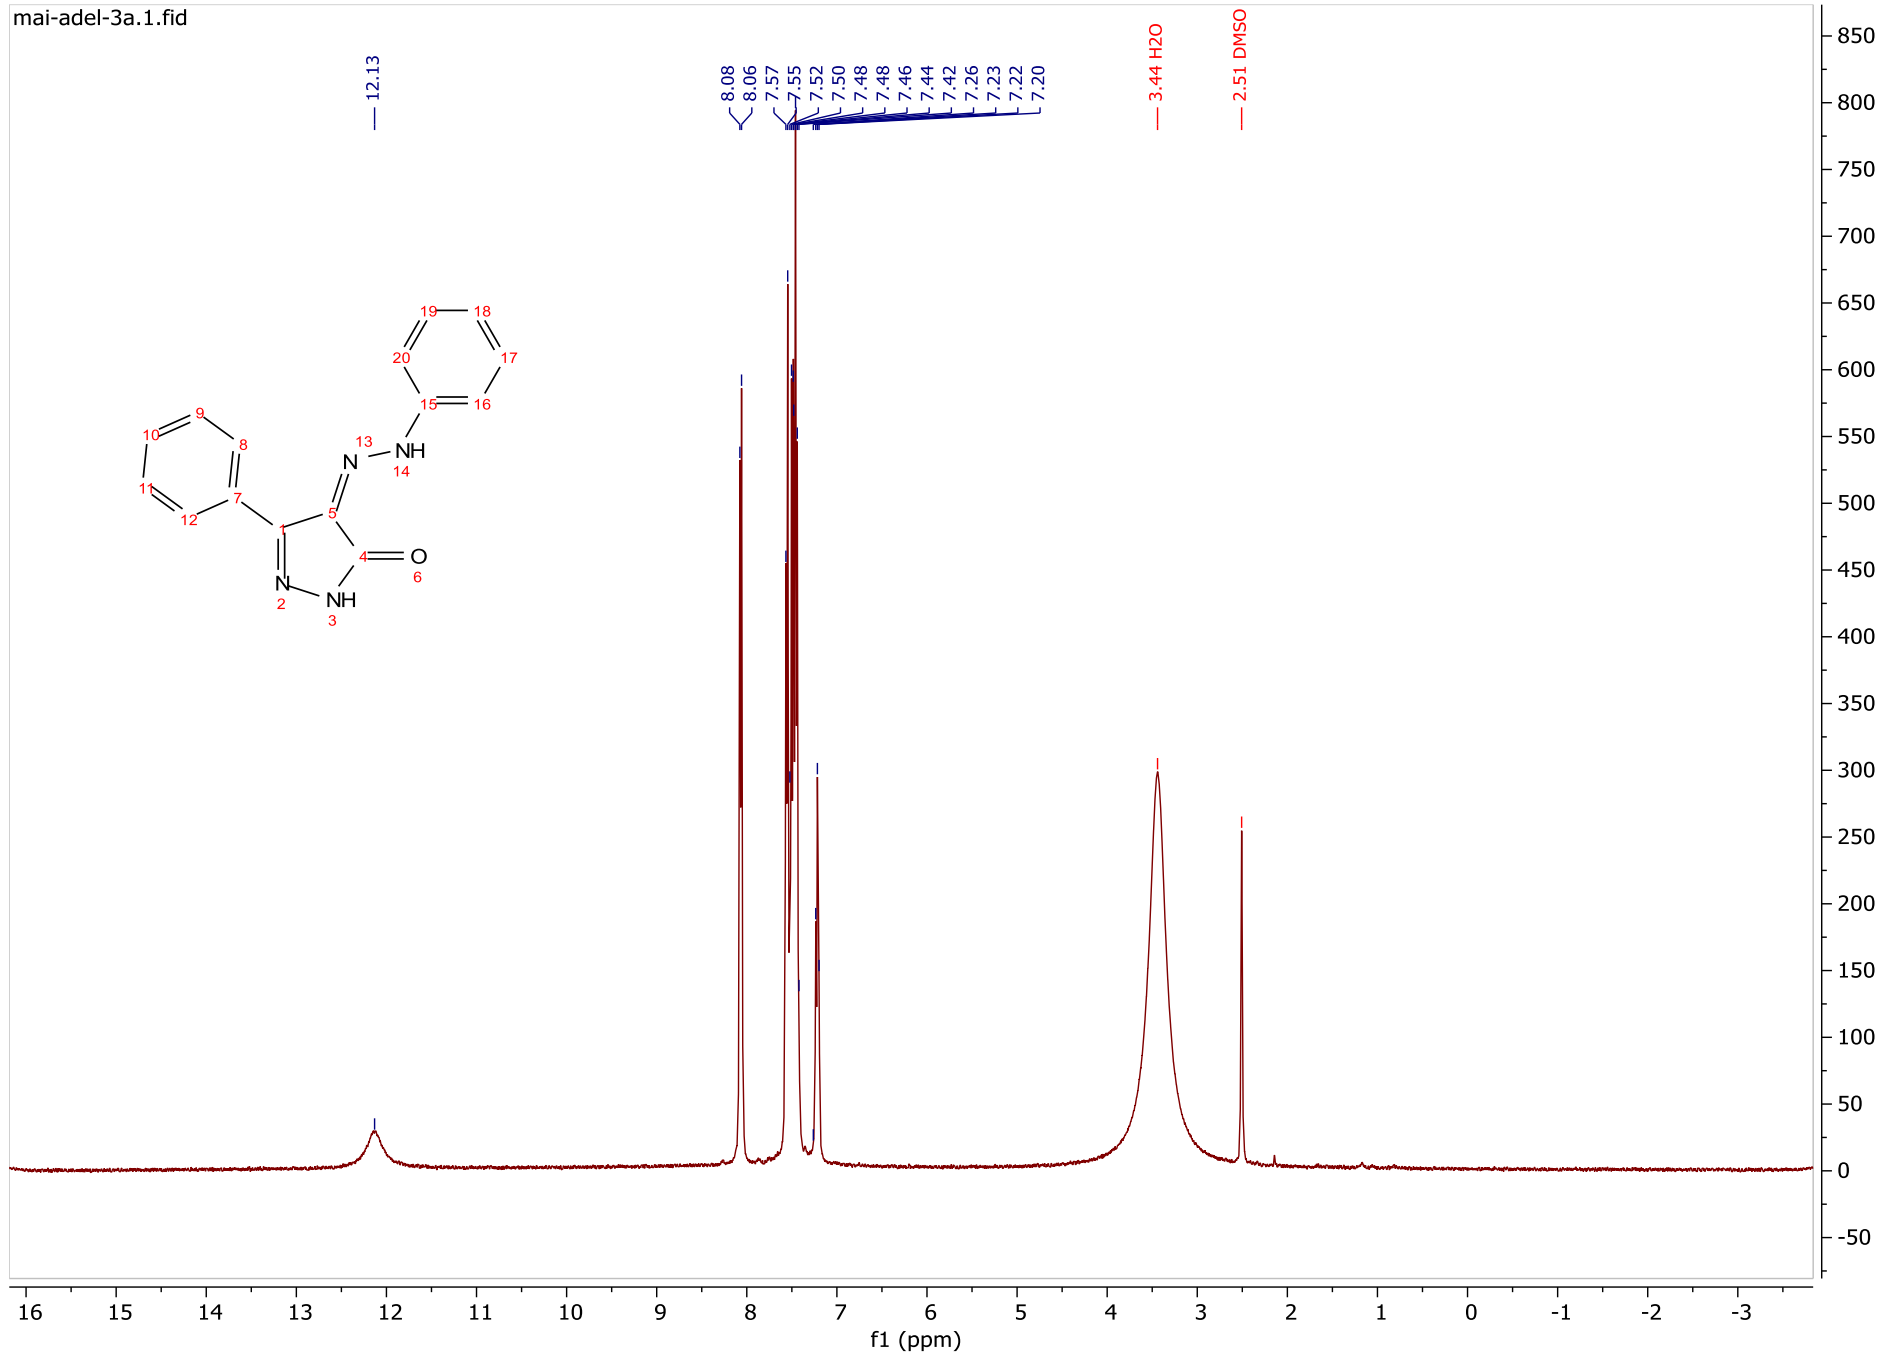

mai-adel-3a.2.fid

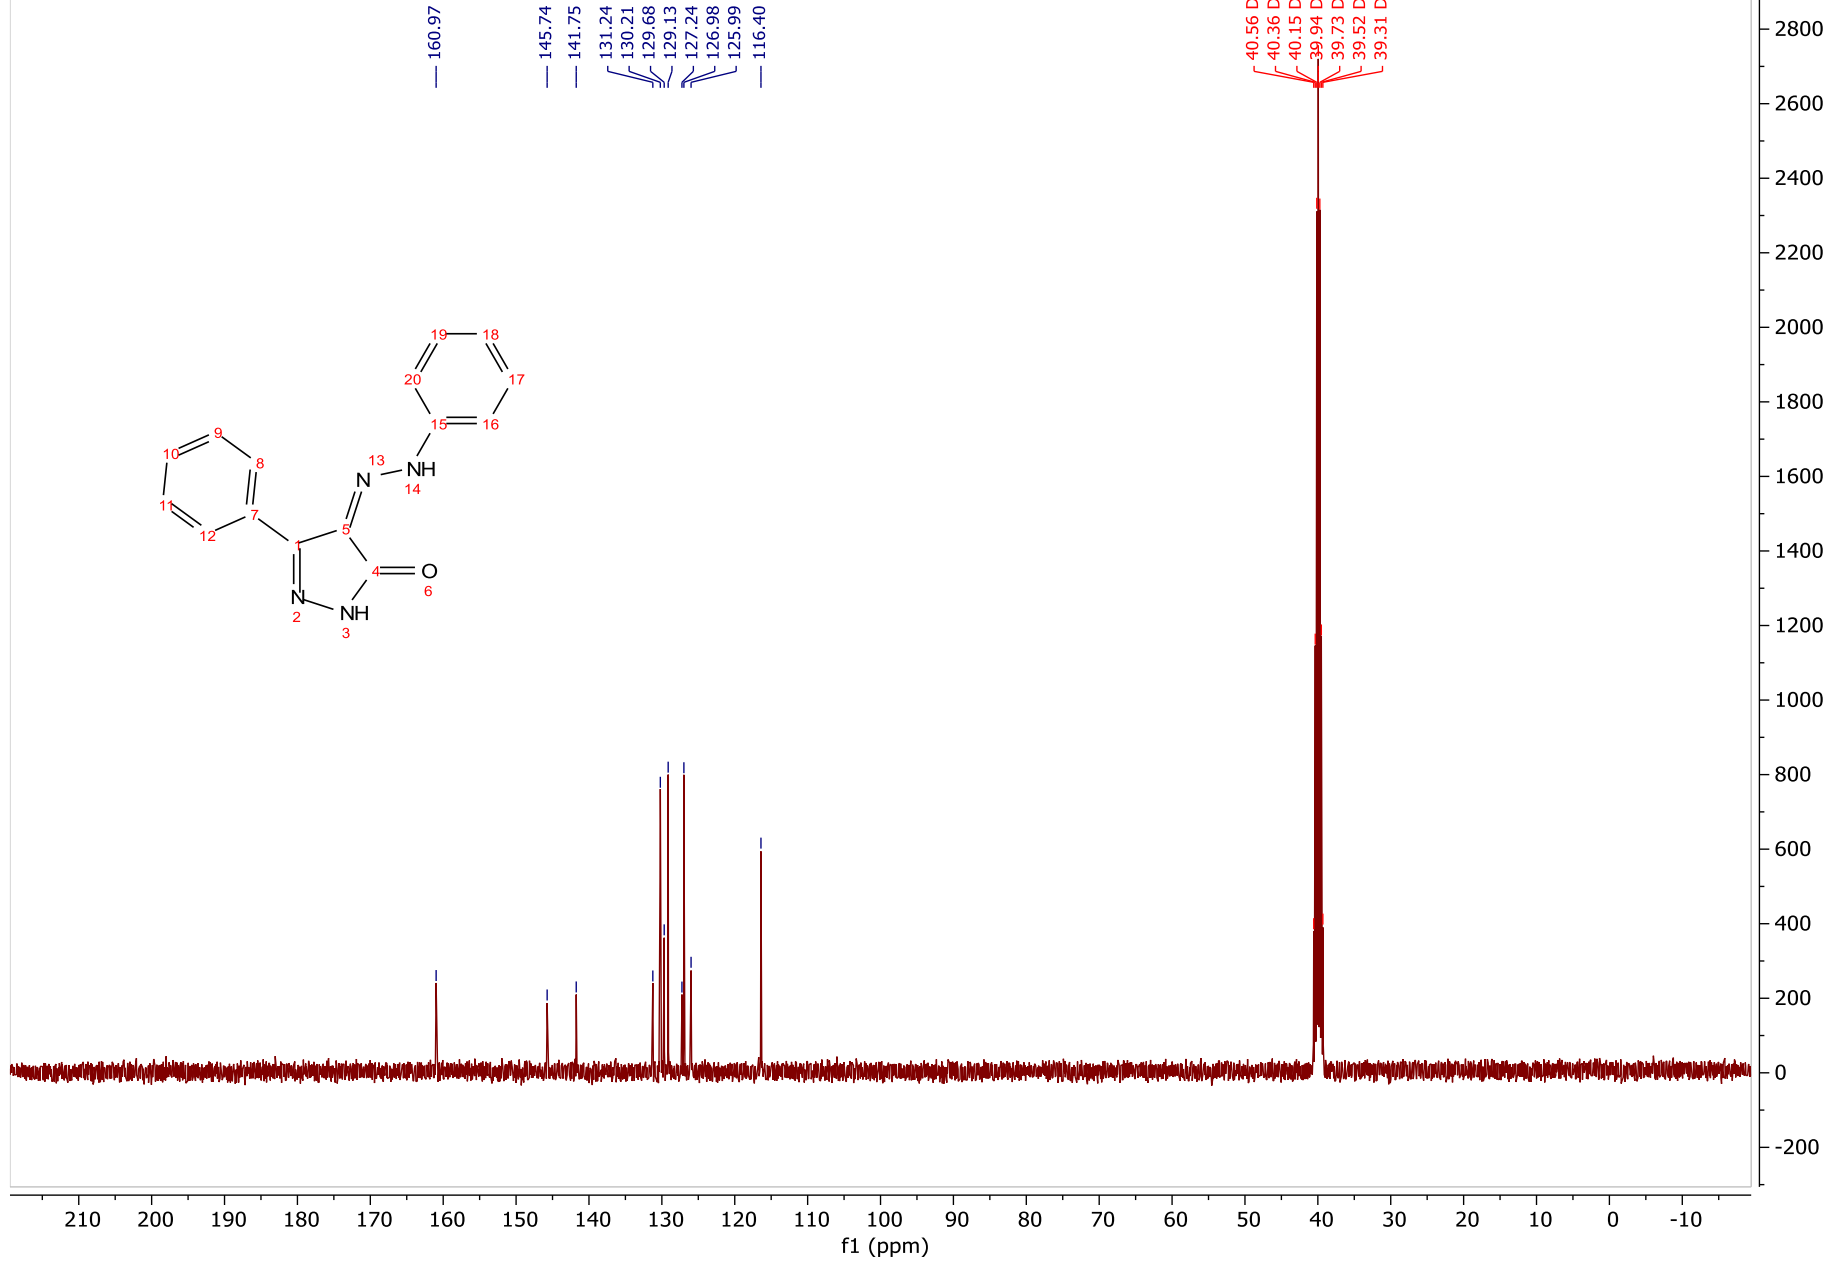

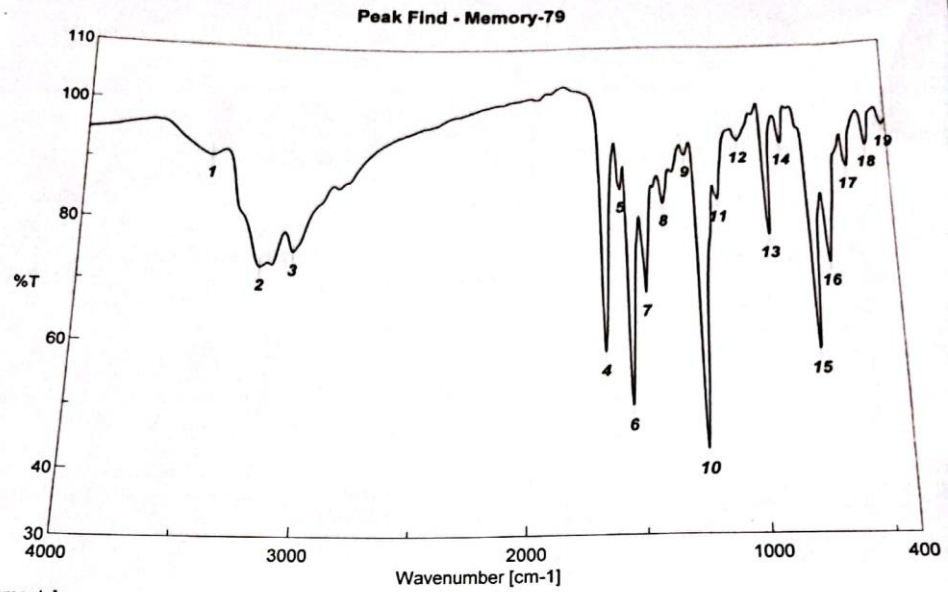

[Comments]  
 Sample name MSD4  
 Comment 12/12/2012  
 User IR  
 Division IR  
 Company Micro Analytical Center

[ Result of Peak Picking ]

| No. | Position | Intensity | No. | Position | Intensity | No. | Position | Intensity |
|-----|----------|-----------|-----|----------|-----------|-----|----------|-----------|
| 1   | 3432.67  | 90.8127   | 2   | 3191.61  | 72.1035   | 3   | 3047.94  | 74.5817   |
| 4   | 1662.34  | 57.6248   | 5   | 1592.91  | 84.2517   | 6   | 1550.49  | 49.1939   |
| 7   | 1486.85  | 66.992    | 8   | 1405.85  | 81.722    | 9   | 1304.61  | 90.1484   |
| 10  | 1243.86  | 42.4676   | 11  | 1164.79  | 82.2924   | 12  | 1066.44  | 92.5169   |
| 13  | 943.985  | 76.2029   | 14  | 873.596  | 92.0836   | 15  | 755.959  | 57.5298   |
| 16  | 686.534  | 71.4918   | 17  | 585.29   | 87.8236   | 18  | 496.58   | 91.4794   |
| 19  | 416.549  | 95.0176   |     |          |           |     |          |           |

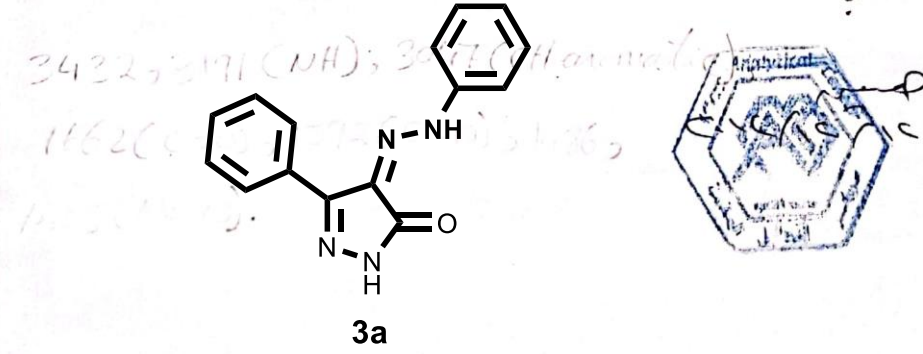

mai-adel-3b-.1.fid

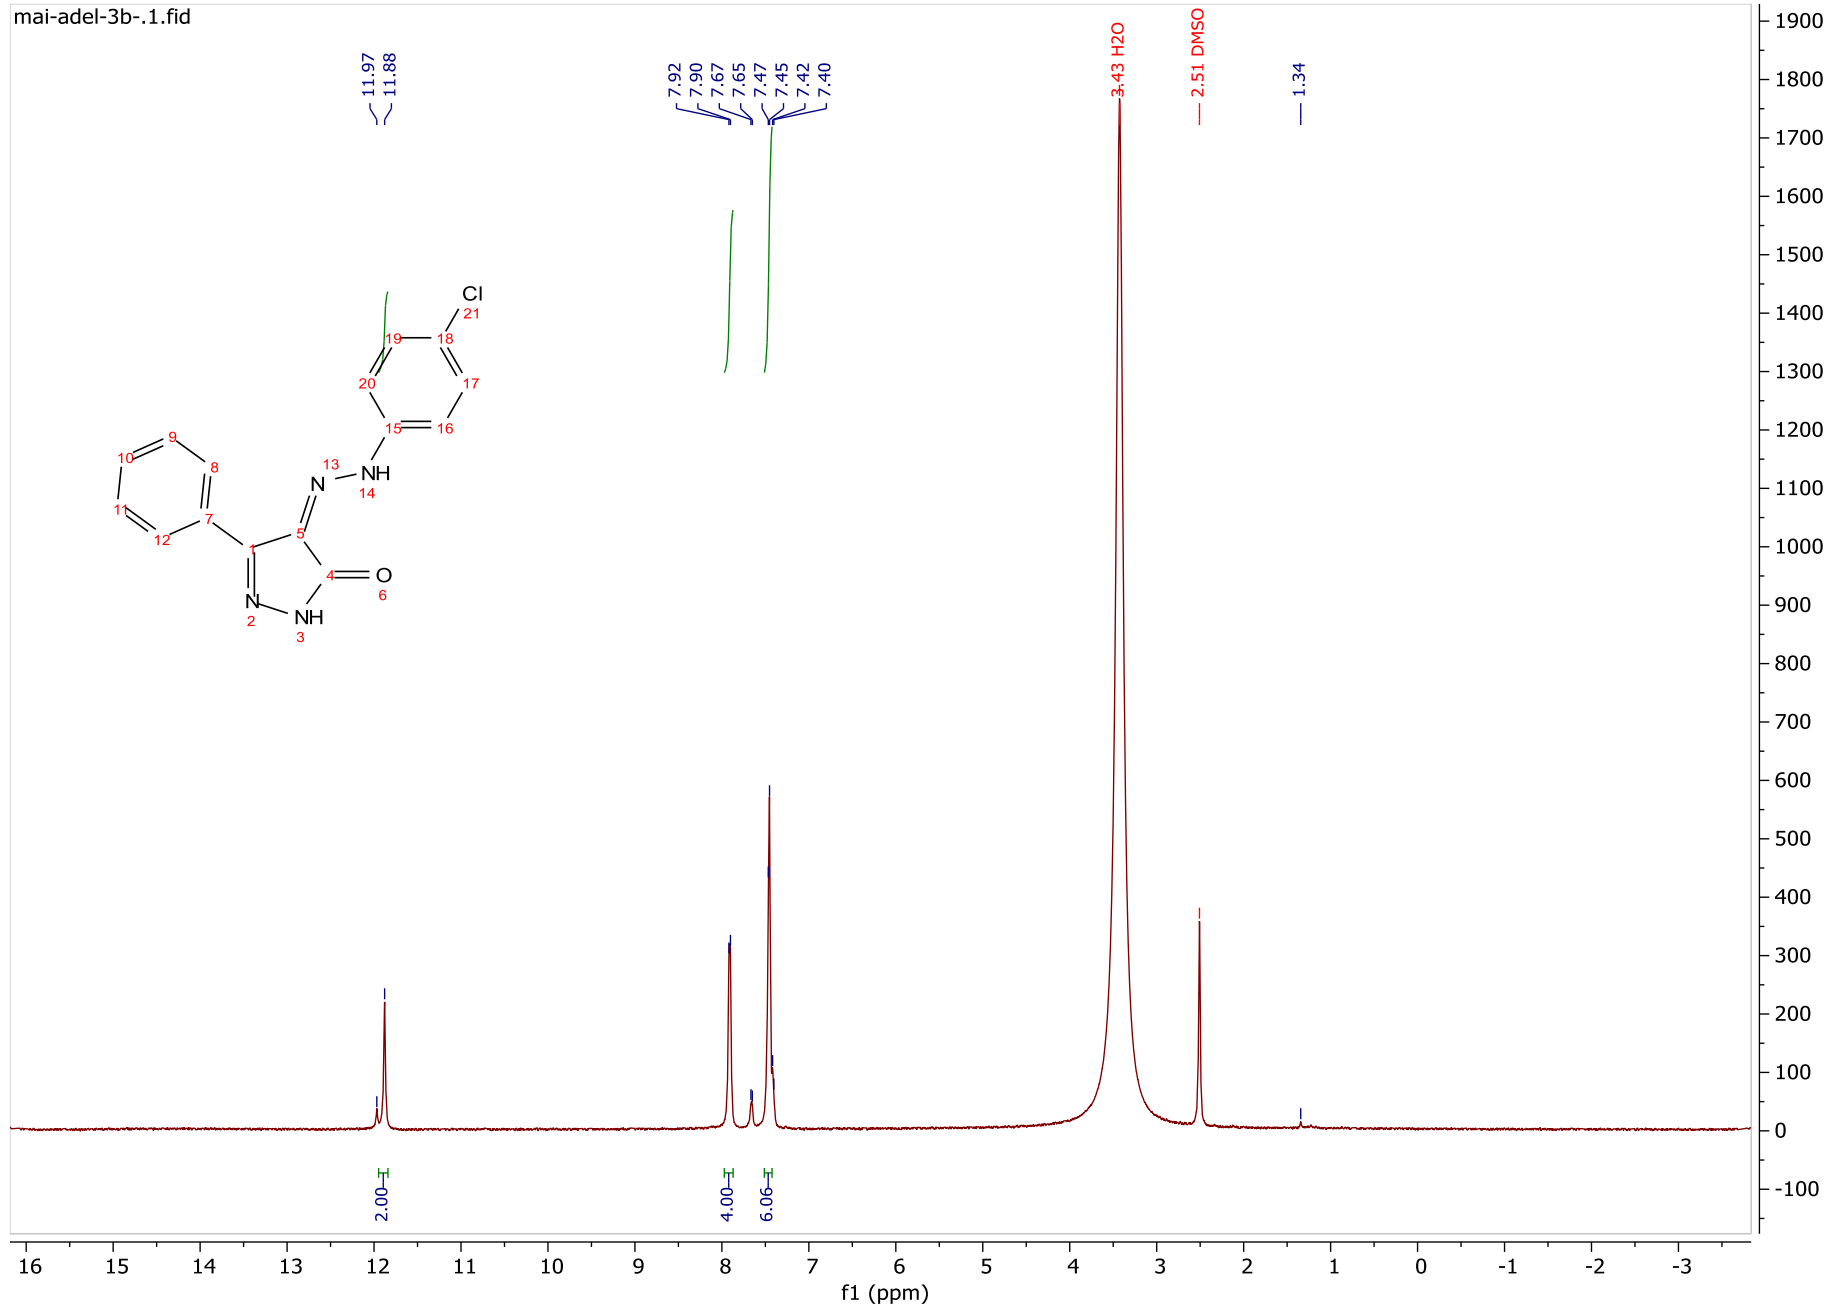

mai-adel-3b.1.fid

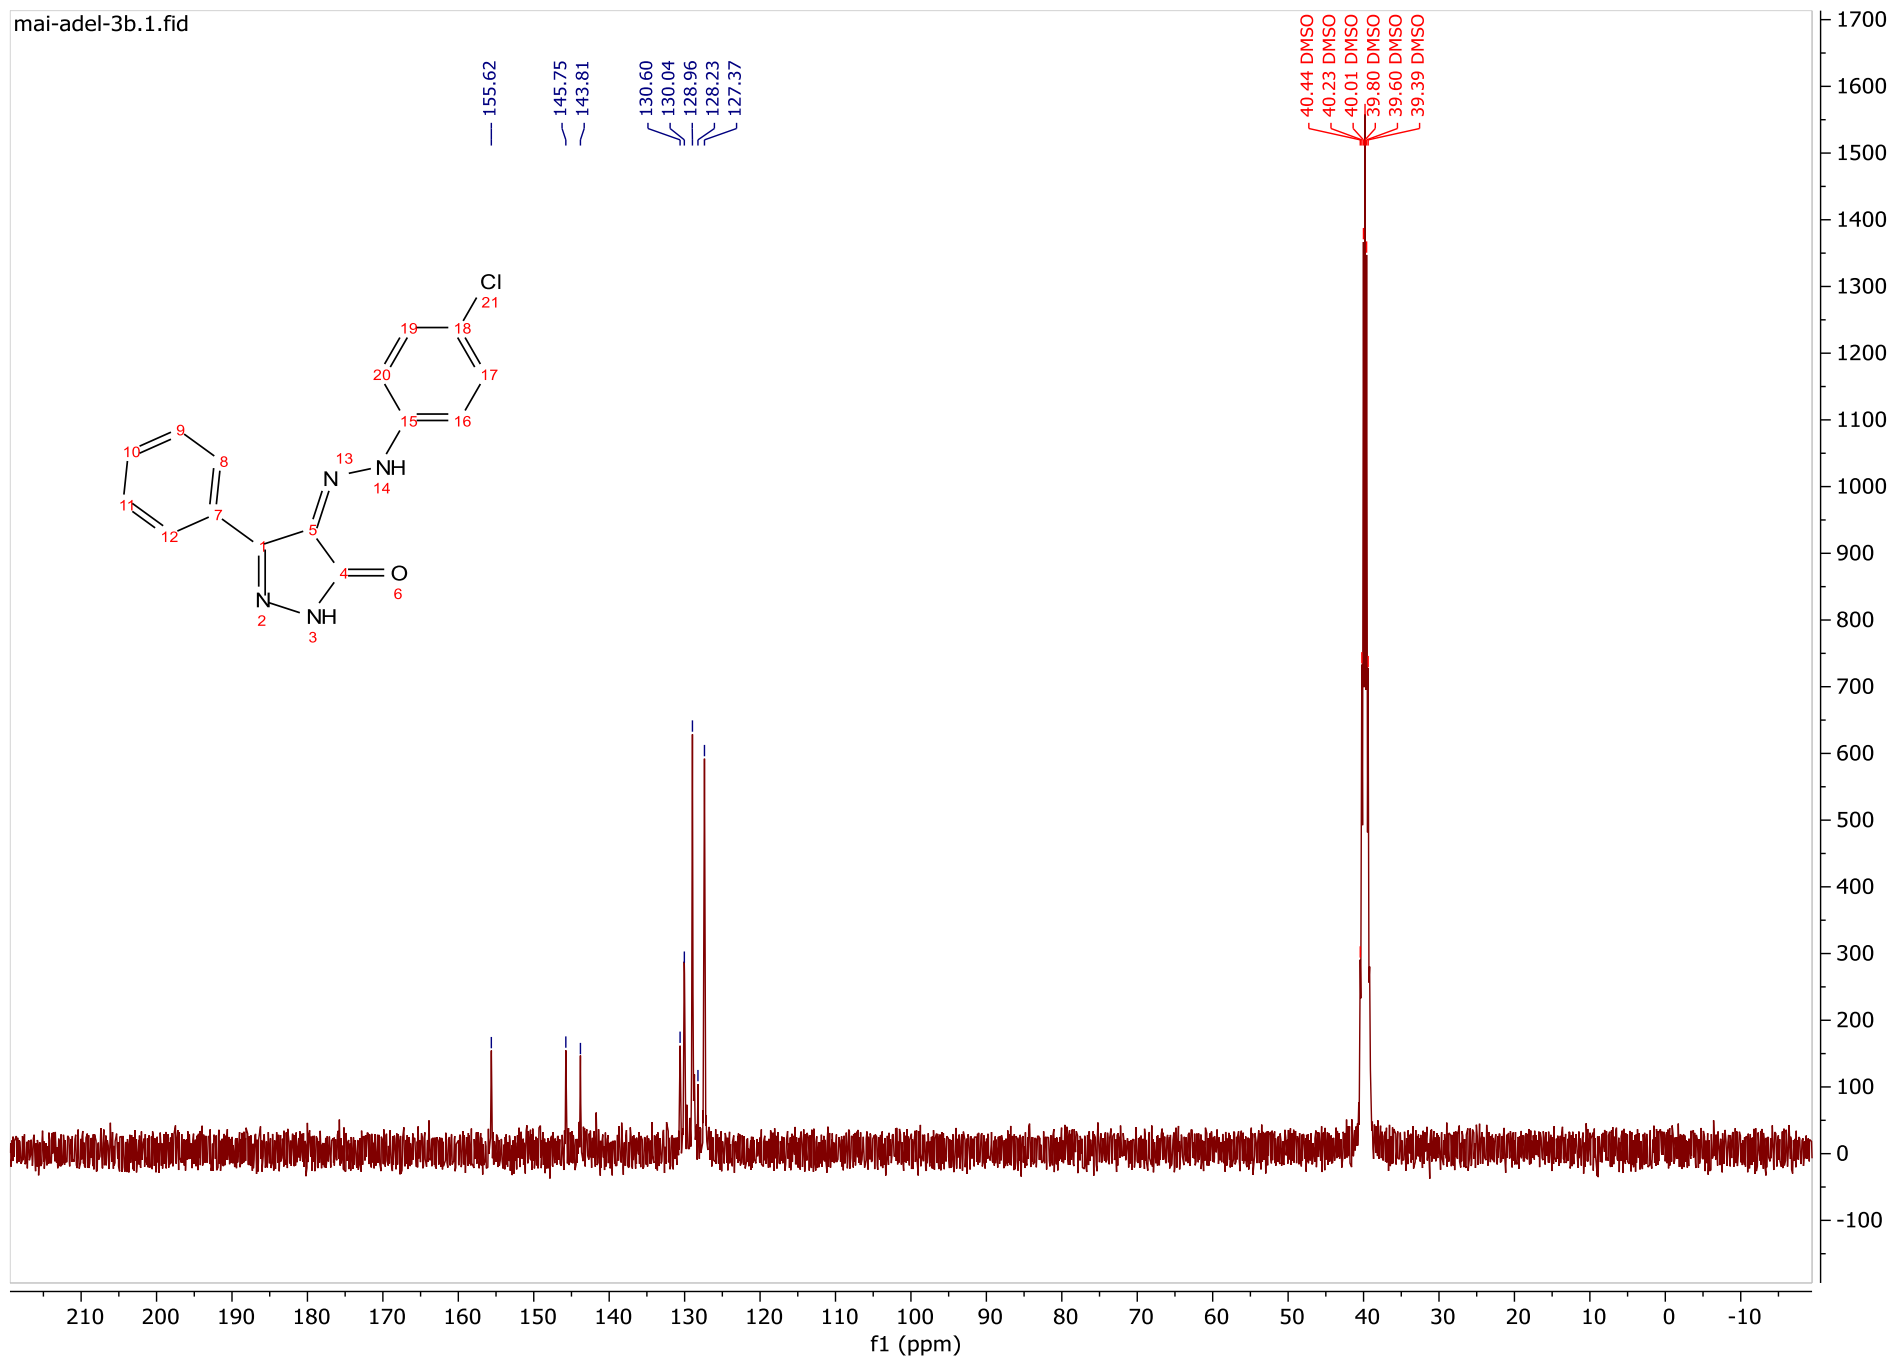

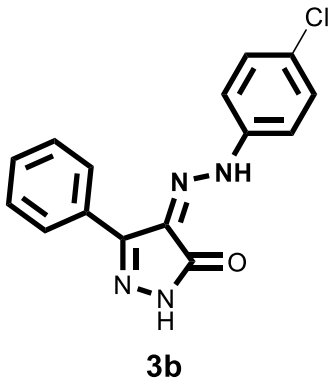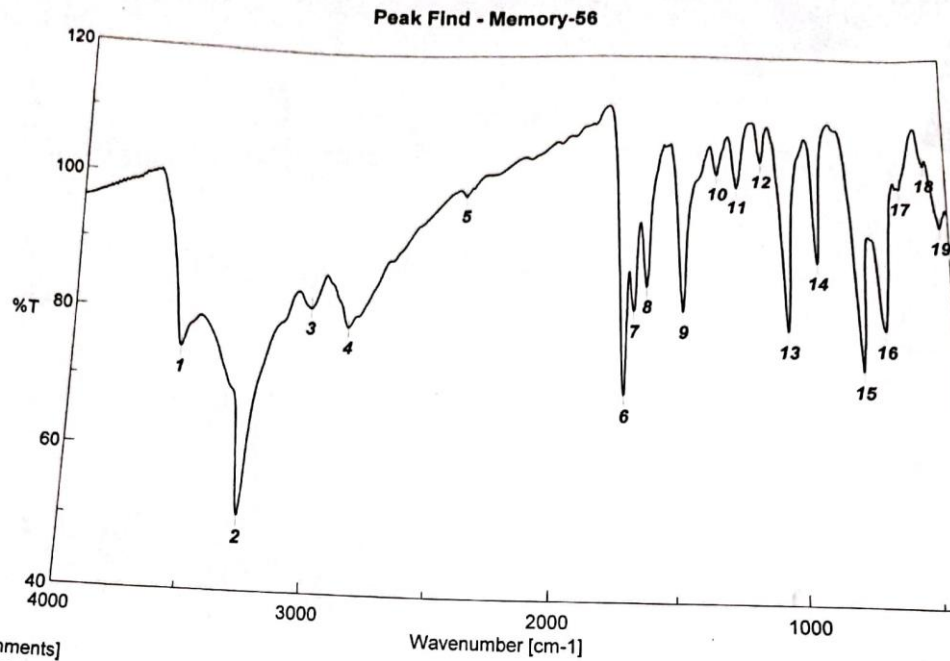

[Comments]  
 Sample name MD8  
 Comment 12/12/2012  
 Method IR  
 Division IR  
 Company Micro Analytical Center

Result of Peak Picking ]

| Position | Intensity |
|----------|-----------|
| 3543.56  | 74.371    |
| 2848.35  | 77.8252   |
| 1671.02  | 80.2547   |
| 1333.53  | 100.875   |
| 1056.8   | 77.4236   |
| 669.178  | 77.8957   |
| 433.905  | 93.5379   |

| No. | Position | Intensity |
|-----|----------|-----------|
| 2   | 3267.79  | 50.4431   |
| 5   | 2369.12  | 97.3773   |
| 8   | 1618.95  | 83.8268   |
| 11  | 1253.5   | 98.9569   |
| 14  | 932.414  | 87.636    |
| 17  | 589.147  | 99.3488   |

| No. | Position | Intensity |
|-----|----------|-----------|
| 3   | 3007.44  | 80.5939   |
| 6   | 1711.51  | 68.1974   |
| 9   | 1474.31  | 80.1612   |
| 12  | 1153.22  | 103.023   |
| 15  | 762.709  | 71.977    |
| 18  | 487.902  | 103.053   |

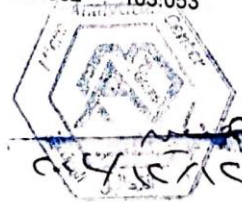

Dalia soliman-MD9-Carbon-DMSO-ES

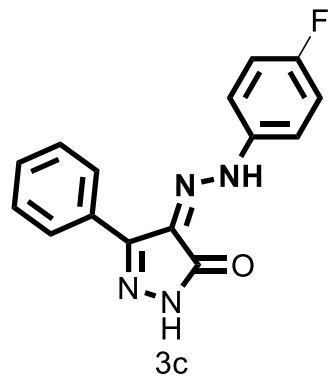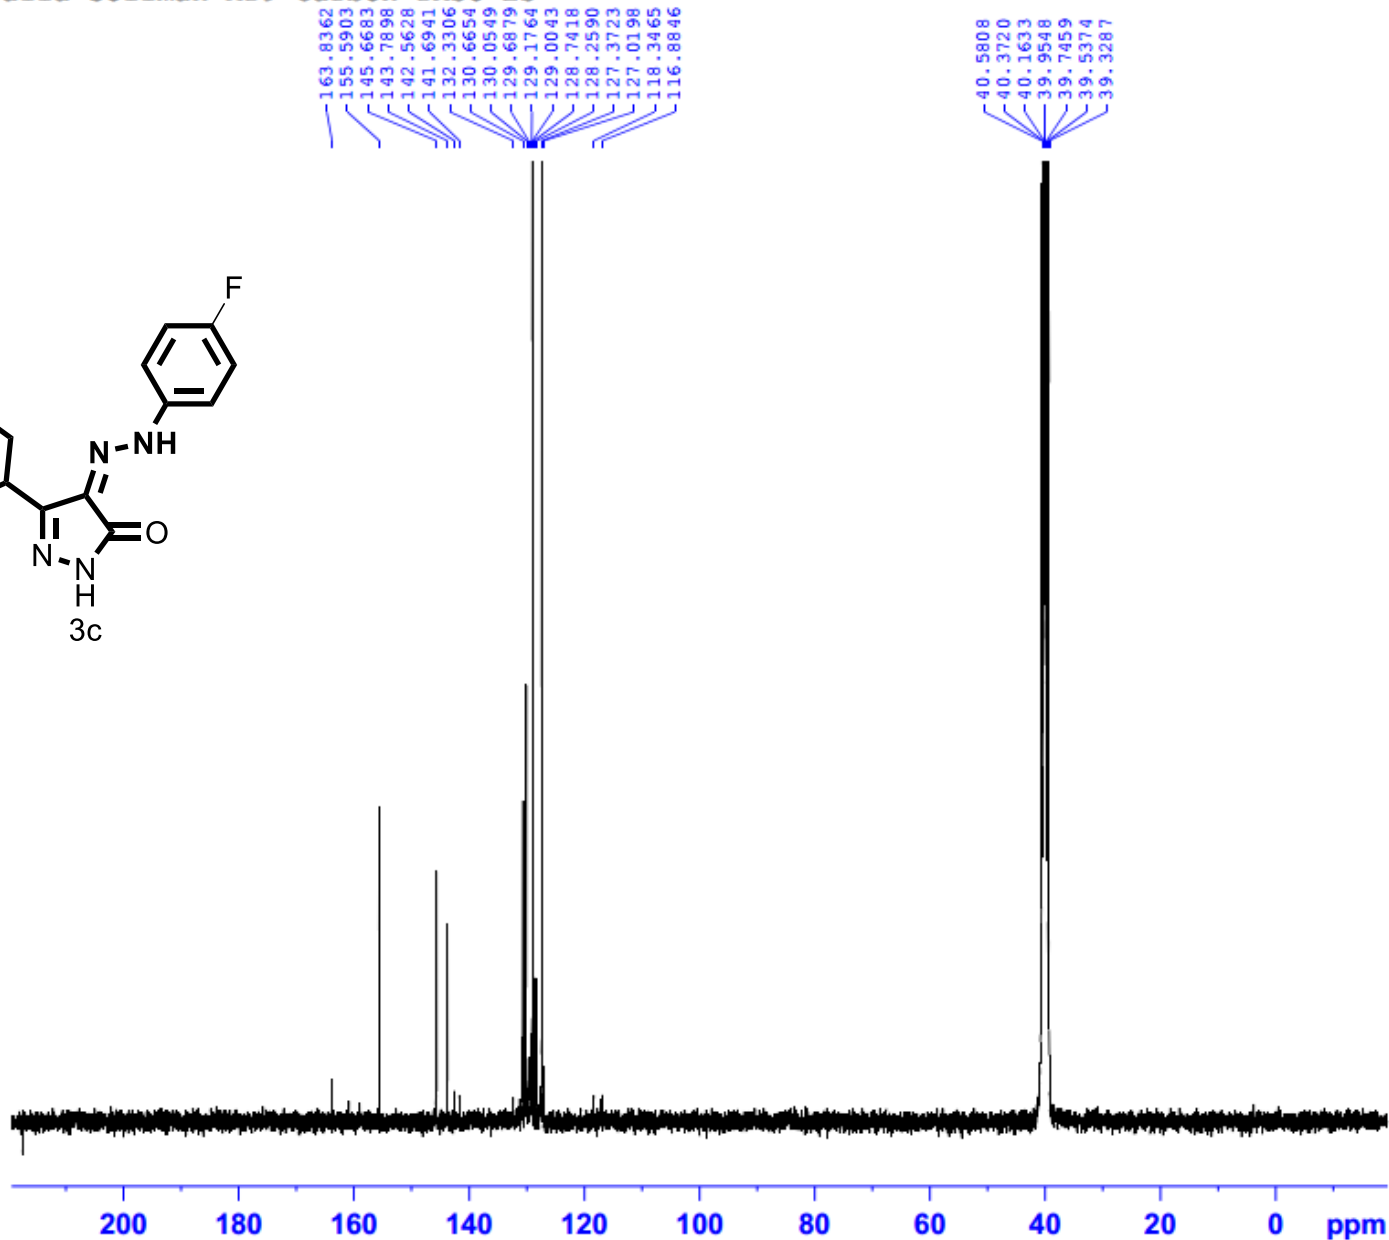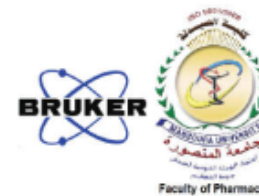

Current Data Parameters  
 NAME Dalia soliman-MD9-Carbon-DMSO-ES  
 EXPNO 10  
 PROCNO 1

F2 - Acquisition Parameters  
 Date\_ 20220511  
 Time 0.31 h  
 INSTRUM spect  
 PROBHD z108618\_0945 f  
 PULPROG zgpg30  
 TD 65536  
 SOLVENT DMSO  
 NS 2200  
 DS 4  
 SWH 24038.461 Hz  
 FIDRES 0.733596 Hz  
 AQ 1.3631488 sec  
 RG 197.77  
 SW 20.800 usec  
 DE 6.50 usec  
 TE 295.9 K  
 D1 2.0000000 sec  
 D11 0.0300000 sec  
 TD0 1  
 SFO1 100.6404331 MHz  
 NUC1 13C  
 P1 10.00 usec  
 PLM1 47.0000000 W  
 SFO2 400.2016008 MHz  
 NUC2 1H  
 CPDPRG2 waltz16  
 PCPD2 90.00 usec  
 PLM2 13.0000000 W  
 PLM12 0.29249999 W  
 PLM13 0.14713000 W

F2 - Processing parameters  
 SI 32768  
 SF 100.6303700 MHz  
 WDW EM  
 SSB 0  
 LB 1.00 Hz  
 GB 0  
 PC 1.40



Dr.DallaSoliman-MD9-H1-DMSO-Main.Defence.Chemical.Laboratory

Pulse Sequence: s2pul  
Solvent: DMSO  
Temp. 25.0 C / 298.1 K  
GEMINI-300BB "NMR"

Relax. delay 1.000 sec  
Pulse 39.4 degrees  
Acq. time 1.998 sec  
Width 8000.0 Hz  
36 repetitions  
OBSERVE H1, 300.0117448 MHz  
DATA PROCESSING  
FT size 32768  
Total time 3 min, 37 sec

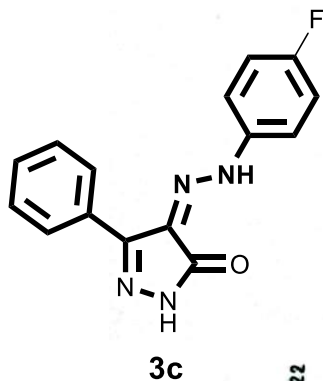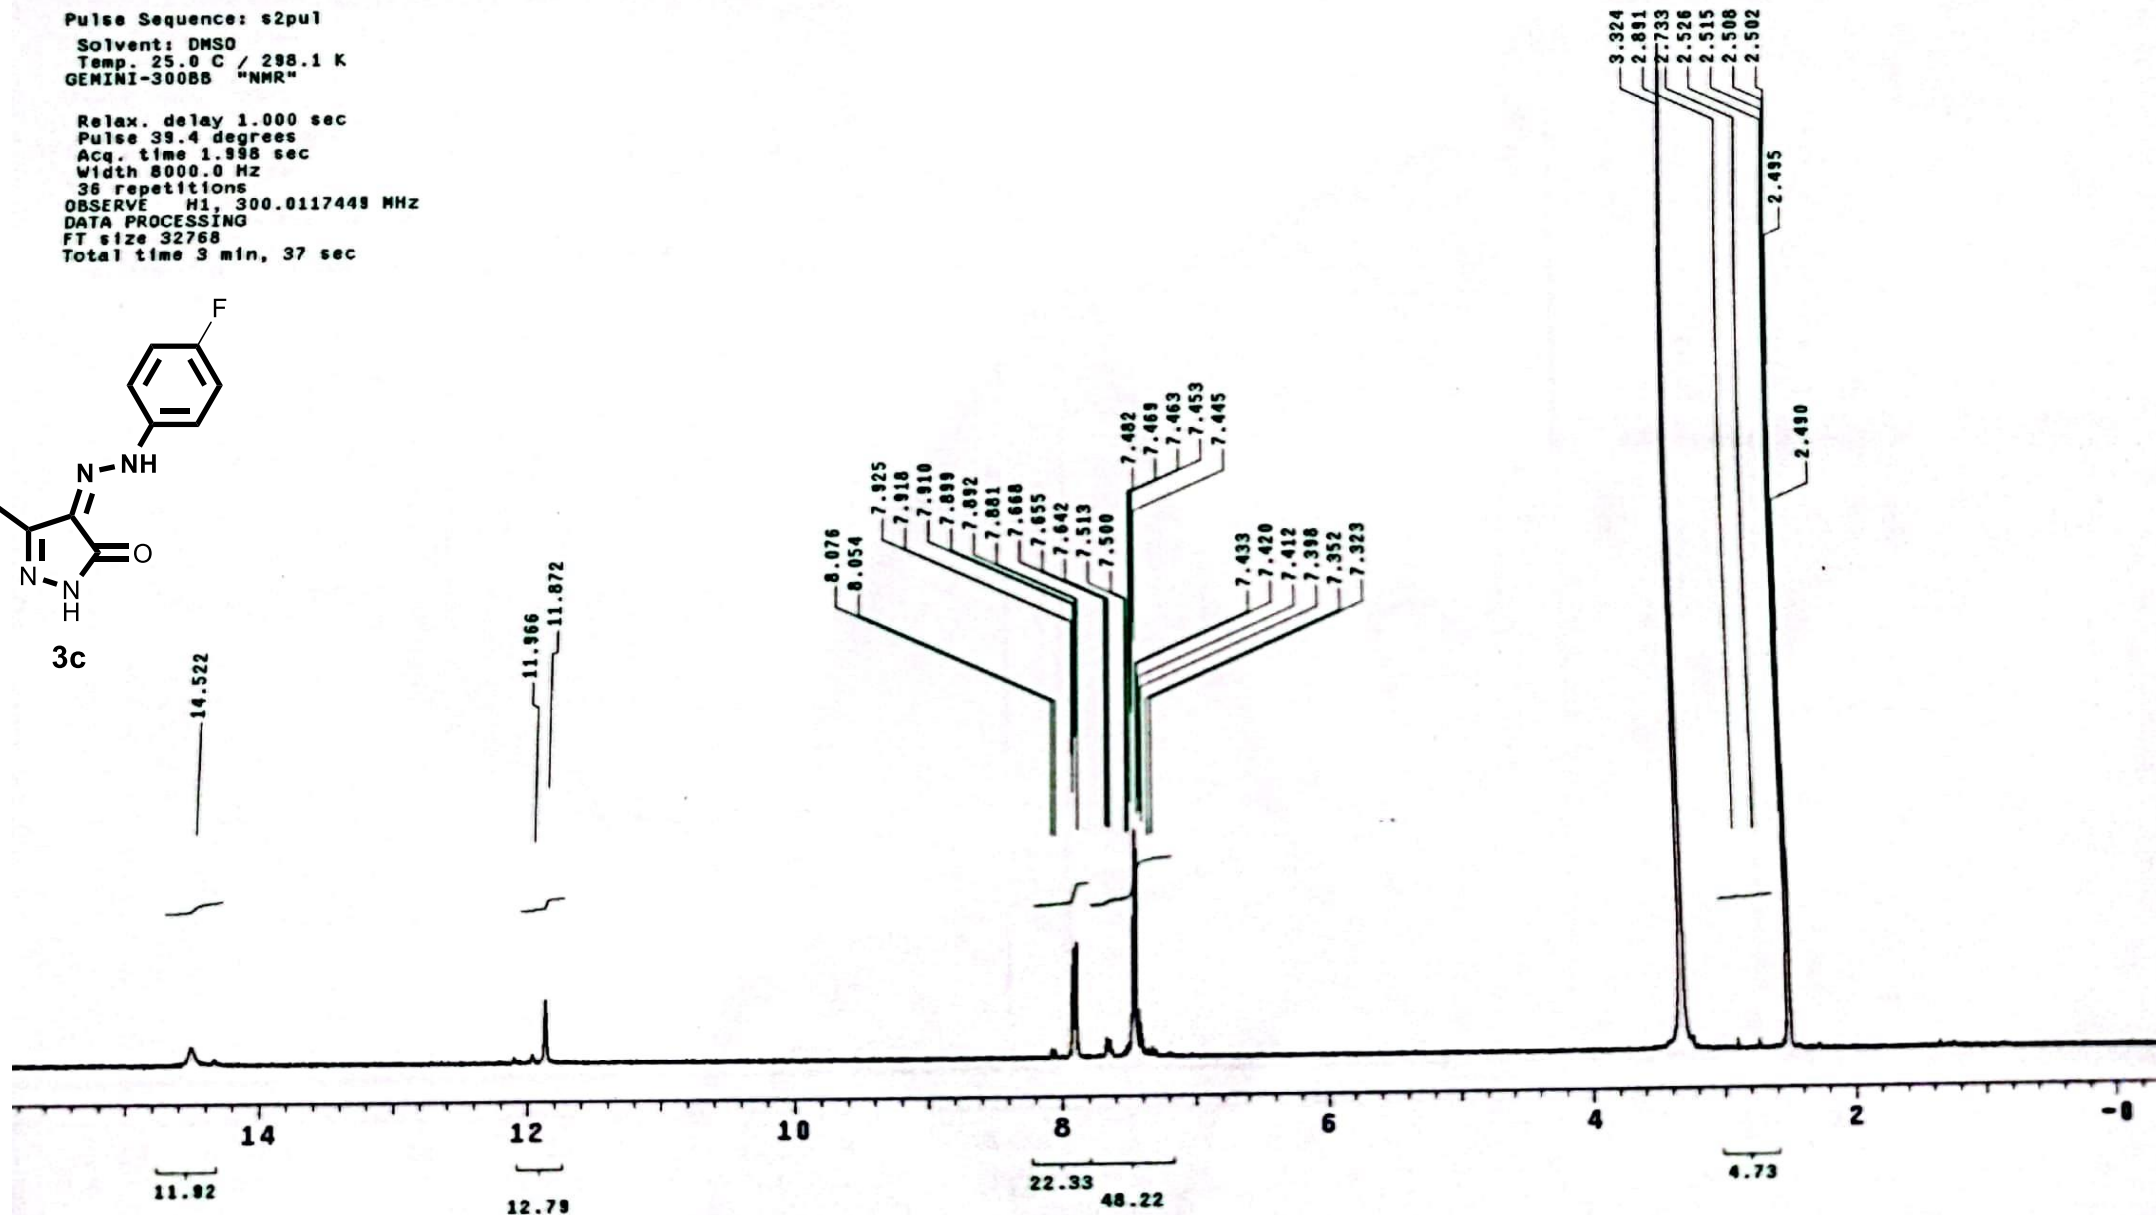

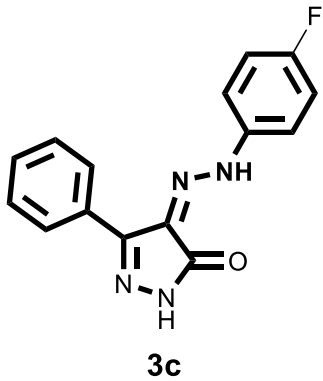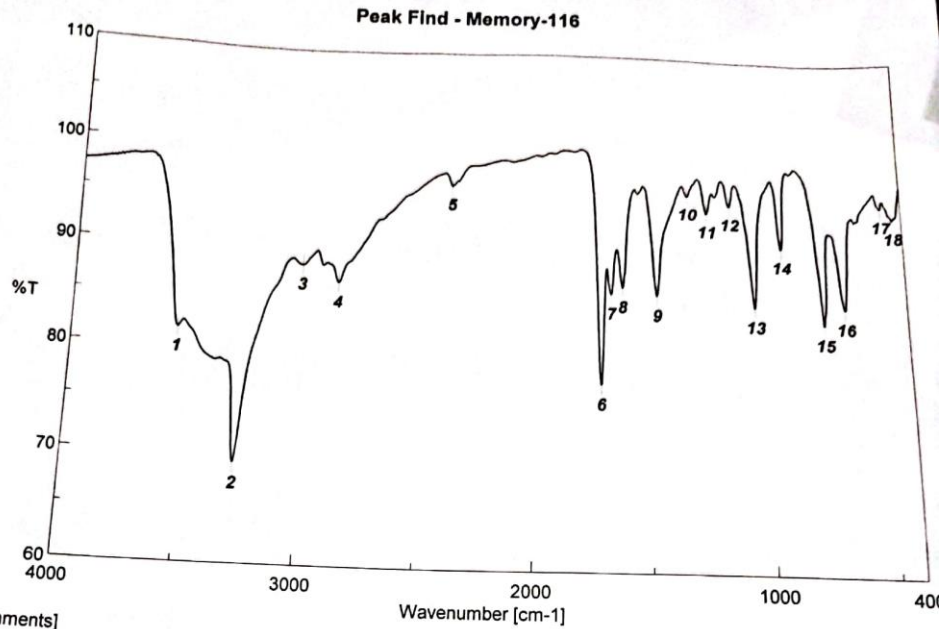

[Comments]  
 Sample name MD9  
 Comment 12/12/2012  
 User IR  
 Division IR  
 Company Micro Analytical Center

Result of Peak Picking ]

| No. | Position | Intensity | No. | Position | Intensity | No. | Position | Intensity |
|-----|----------|-----------|-----|----------|-----------|-----|----------|-----------|
| 1   | 3540.67  | 81.5317   | 2   | 3268.75  | 69.0422   | 3   | 3012.27  | 87.8988   |
| 2   | 2853.17  | 86.1914   | 5   | 2365.26  | 95.9361   | 6   | 1713.44  | 76.7895   |
| 3   | 1670.05  | 85.3349   | 8   | 1621.84  | 85.9855   | 9   | 1475.28  | 85.2198   |
| 4   | 1337.39  | 95.3479   | 11  | 1254.47  | 93.5837   | 12  | 1154.19  | 94.4152   |
| 5   | 1057.76  | 84.2929   | 14  | 934.342  | 90.2879   | 15  | 761.744  | 82.8141   |
| 6   | 668.214  | 84.4367   | 17  | 487.902  | 94.8503   | 18  | 438.726  | 93.6942   |

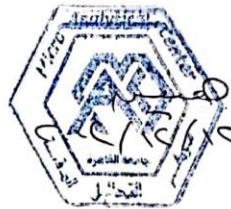

Dr. Dalia Soliman-ND6-H1-DMSO-Rain. Defence. Chemical. Laboratory

Pulse Sequence: s2pul  
Solvent: DMSO  
Temp: 25.0 C / 298.1 K  
File: Dr. Dalia Soliman-ND6-H1-DMSO-Rain. Defence. Chemical. Laboratory  
GENINI-30088 "NMR"

Relax. delay 1.000 sec  
Pulse 39.4 degrees  
Acq. time 1.998 sec  
Width 8000.0 Hz  
18 repetitions  
OBSERVE H1, 300.8117449 MHz  
DATA PROCESSING  
FT size 32768  
Total time 3 min, 37 sec

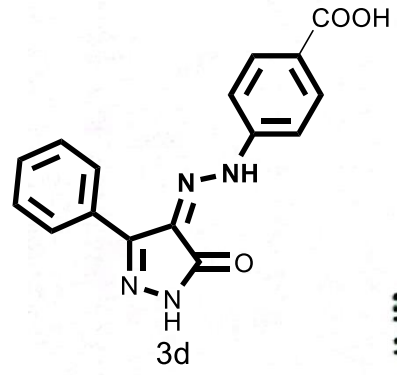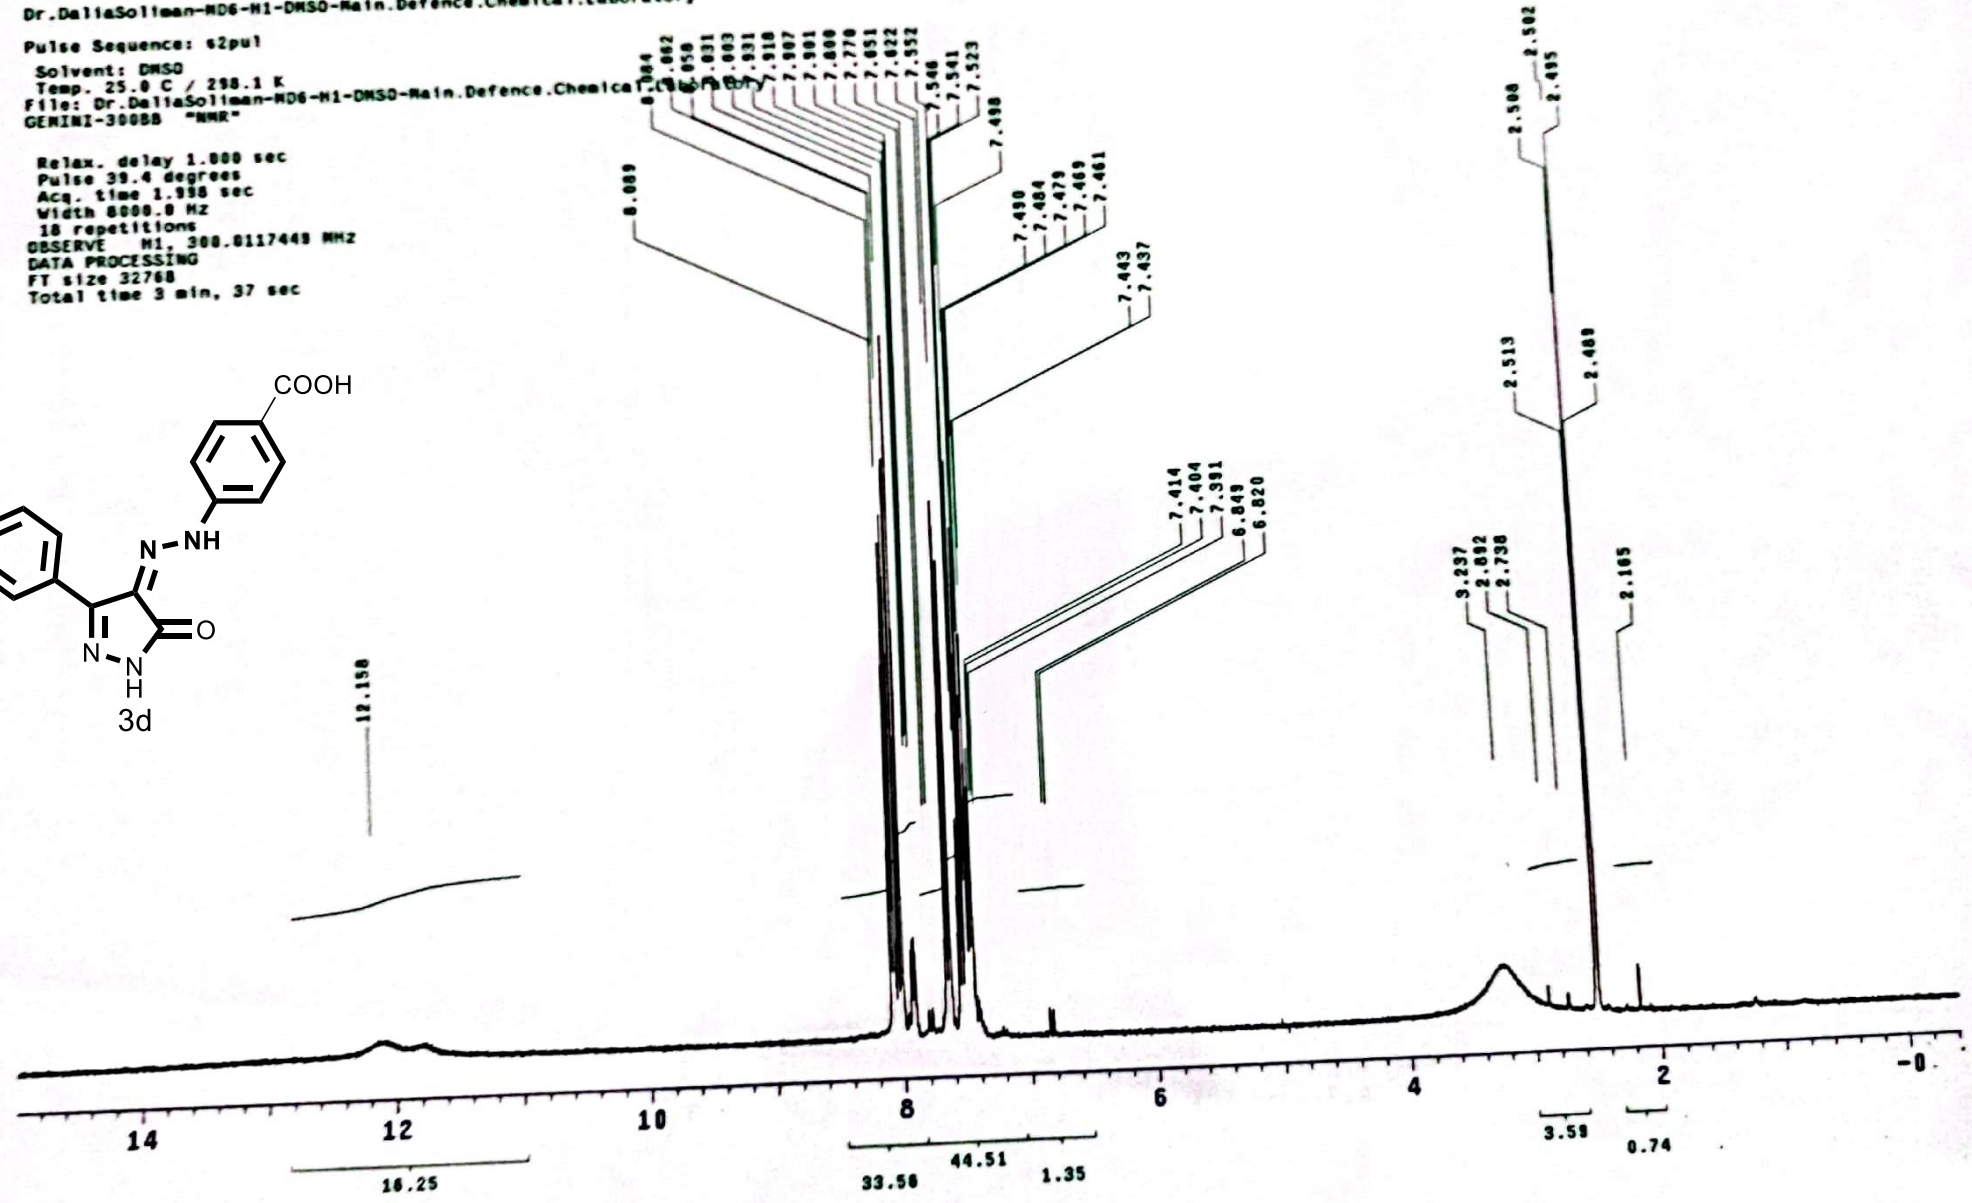

Dalia soliman-MD6-Carbon-DMSO-ES

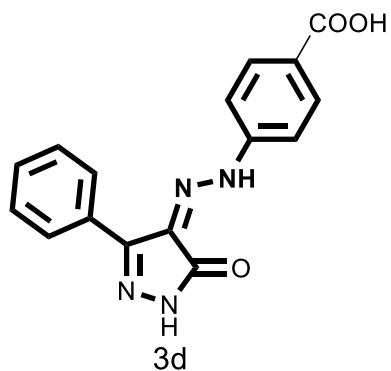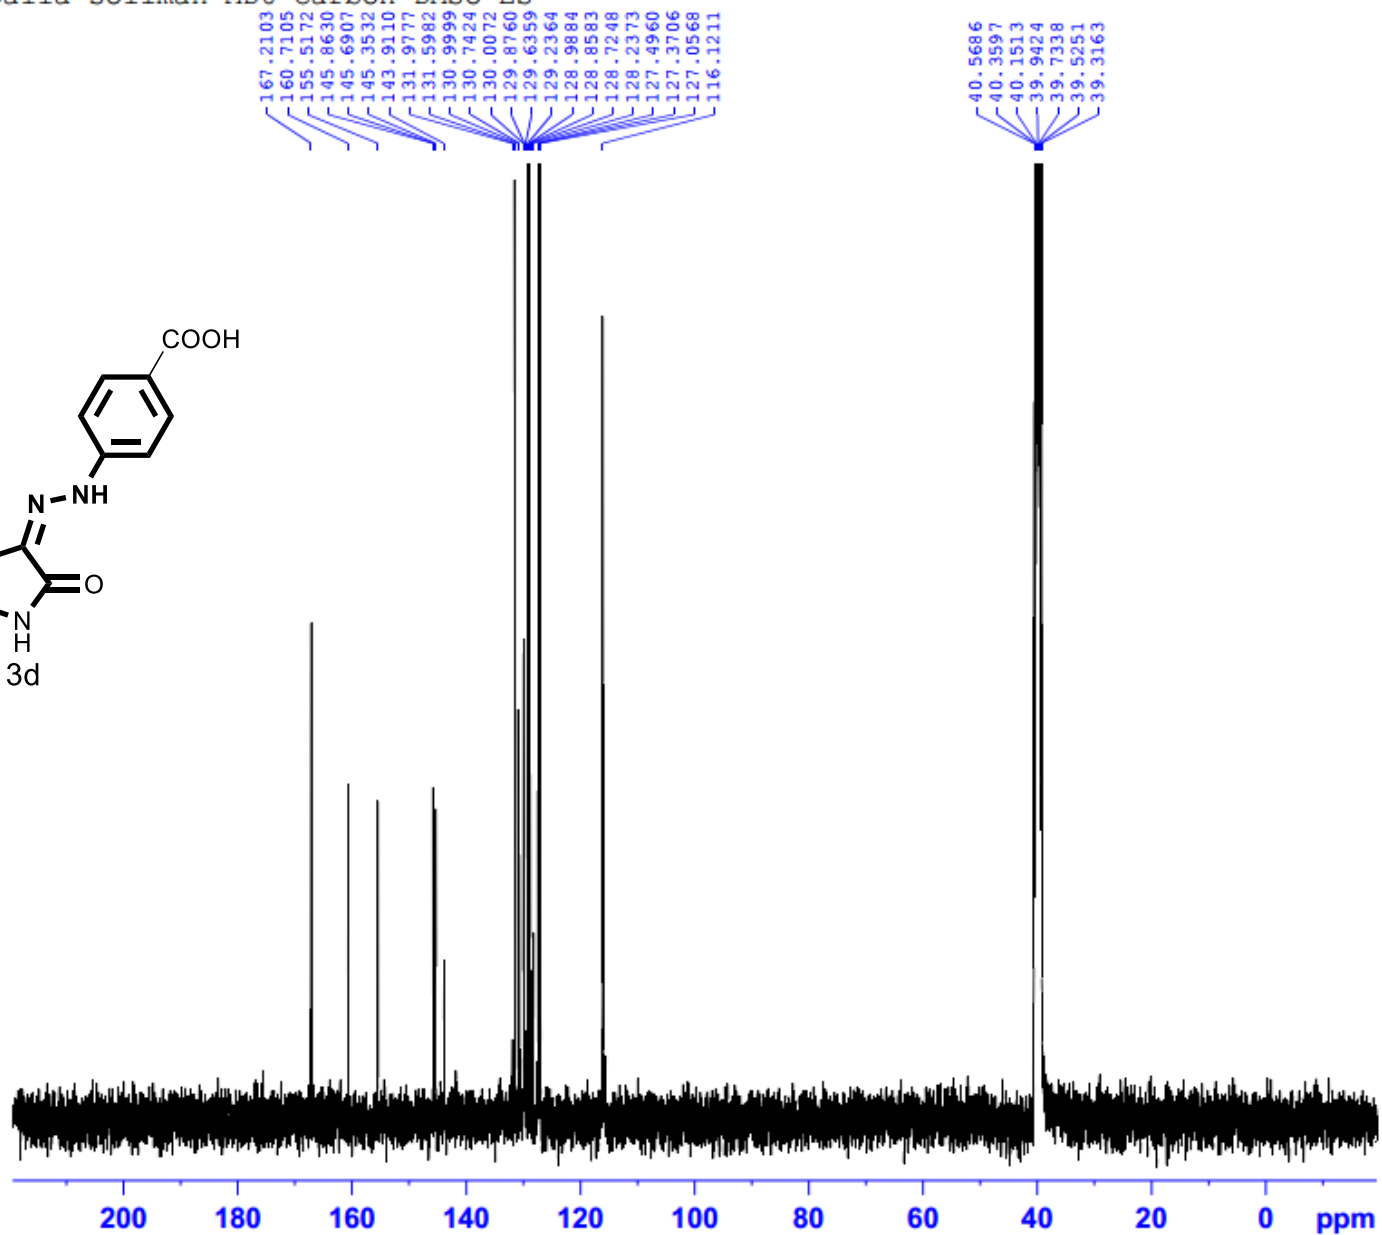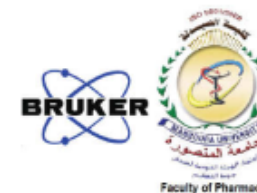

Current Data Parameters  
 NAME Dalia soliman-MD6-Carbon-DMSO-ES  
 EXPNO 10  
 PROCNO 1

F2 - Acquisition Parameters  
 Date\_ 20220513  
 Time 9.48 h  
 INSTRUM spect  
 PROBHD z108618\_0945 (z)  
 PULPROG zgpg30  
 TD 65536  
 SOLVENT DMSO  
 NS 2200  
 DS 4  
 SWH 24038.461 Hz  
 FIDRES 0.733596 Hz  
 AQ 1.3631488 sec  
 RG 197.77  
 DW 20.800 usec  
 DE 6.50 usec  
 TE 294.1 K  
 D1 2.0000000 sec  
 D11 0.0300000 sec  
 TDD 1  
 SFO1 100.6404331 MHz  
 NUC1 13C  
 P1 10.00 usec  
 PLW1 47.0000000 W  
 SFO2 400.2016008 MHz  
 NUC2 1H  
 CPDPRG2 waltz16  
 PCPD2 90.00 usec  
 PLW2 13.0000000 W  
 PLW12 0.29249999 W  
 PLW13 0.14713000 W

F2 - Processing parameters  
 SI 32768  
 SF 100.6303700 MHz  
 MDW EX  
 SSB 0  
 LB 1.00 Hz  
 GB 0  
 PC 1.40

Dalia soliman-MD11-Carbon-DMSO-ES

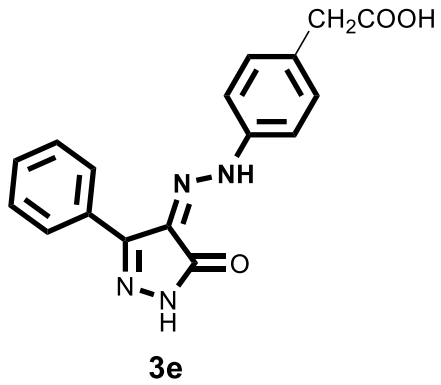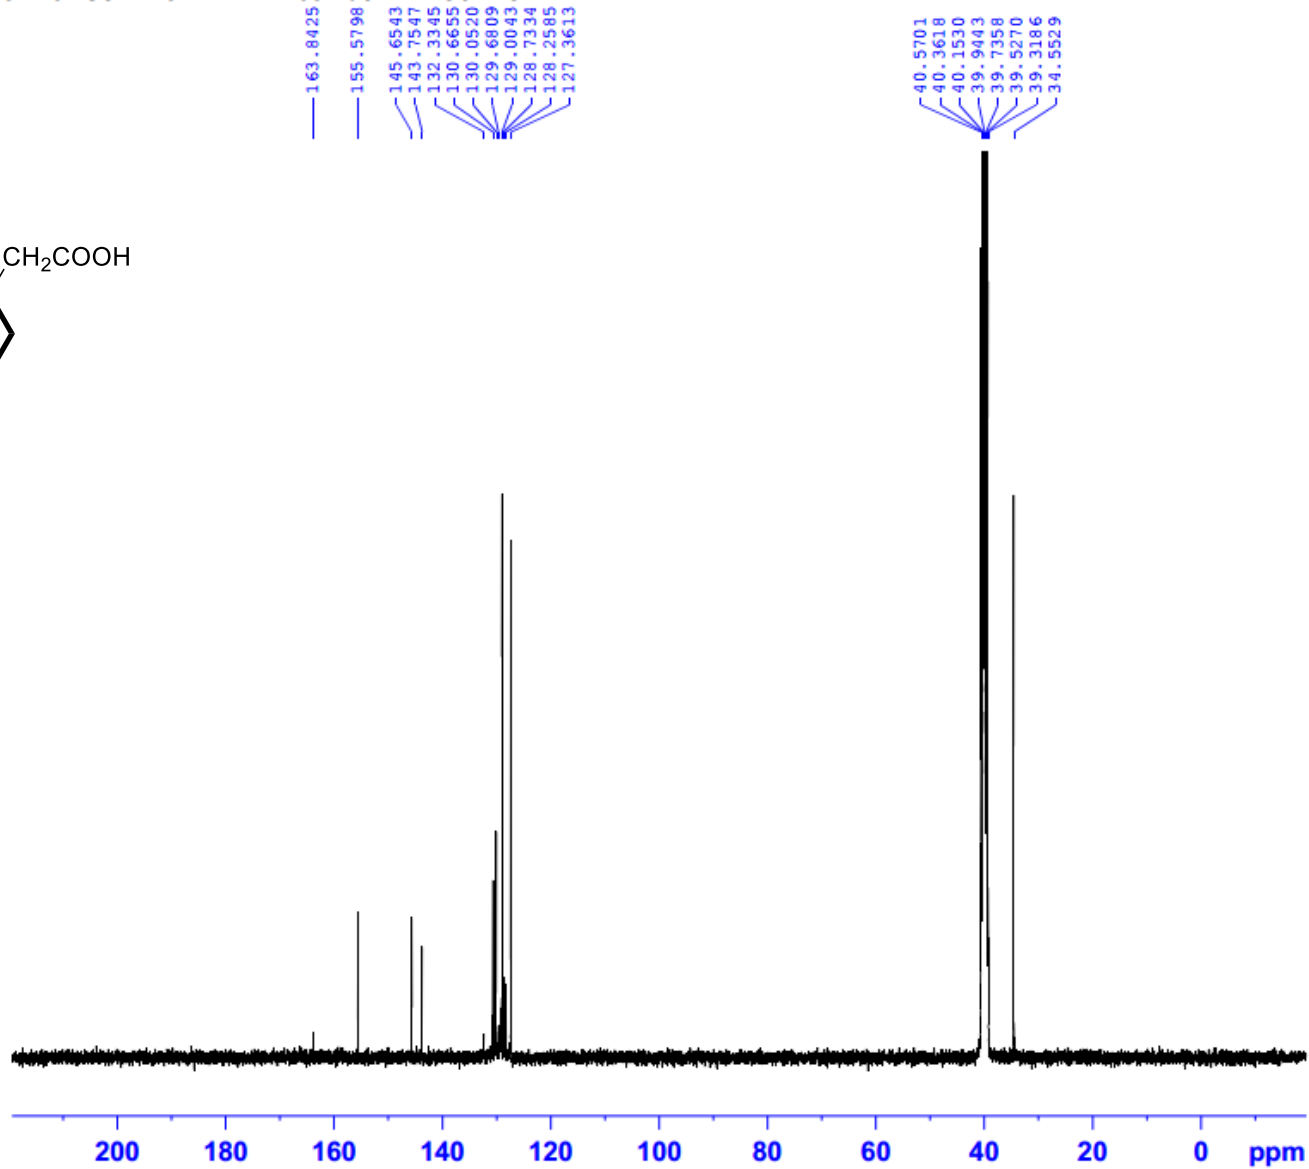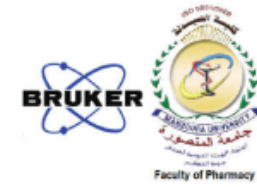

```

Current Data Parameters
NAME      Dalia soliman-MD11-Carbon-DMSO-ES
EXPNO    10
PROCNO   1

F2 - Acquisition Parameters
Date_    20220510
Time     22.21 h
INSTRUM  spect
PROBHD   X100618_0945 (
PULPROG  zgpg30
TD       65536
SOLVENT  DMSO
NS       2200
DS       4
SWH      24038.461 Hz
FIDRES   0.733596 Hz
AQ       1.3631488 sec
RG       197.77
DW       20.800 usec
DE       6.50 usec
TE       295.8 K
D1       2.00000000 sec
D11      0.03000000 sec
TDD      1
SFO1     100.6404331 MHz
NUC1     13C
P1       10.00 usec
PLW1     47.00000000 W
SFO2     400.2016008 MHz
NUC2     1H
CPOPRG[2] waltz16
PCPD2    90.00 usec
PLW2     13.00000000 W
PLW12    0.29249999 W
PLW13    0.14713000 W

F2 - Processing parameters
SI       32768
SF       100.6303700 MHz
WDW      EM
SSB      0
LB       1.00 Hz
GB       0
PC       1.40
    
```



Dr. Dalia Soliman-ND11-H1-DMSO-Main. Defence. Chemical. Laboratory

Pulse Sequence: s2pu1

Solvent: DMSO  
Temp. 25.0 C / 298.1 K  
GEMINI-300BB "NMR"

Relax. delay 1.000 sec  
Pulse 39.4 degrees  
Acq. time 1.998 sec  
Width 8000.0 Hz  
42 repetitions  
OBSERVE H1, 300.0117449 MHz  
DATA PROCESSING  
FT size 32768  
Total time 3 min, 37 sec

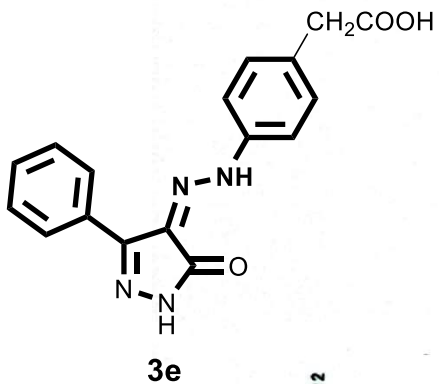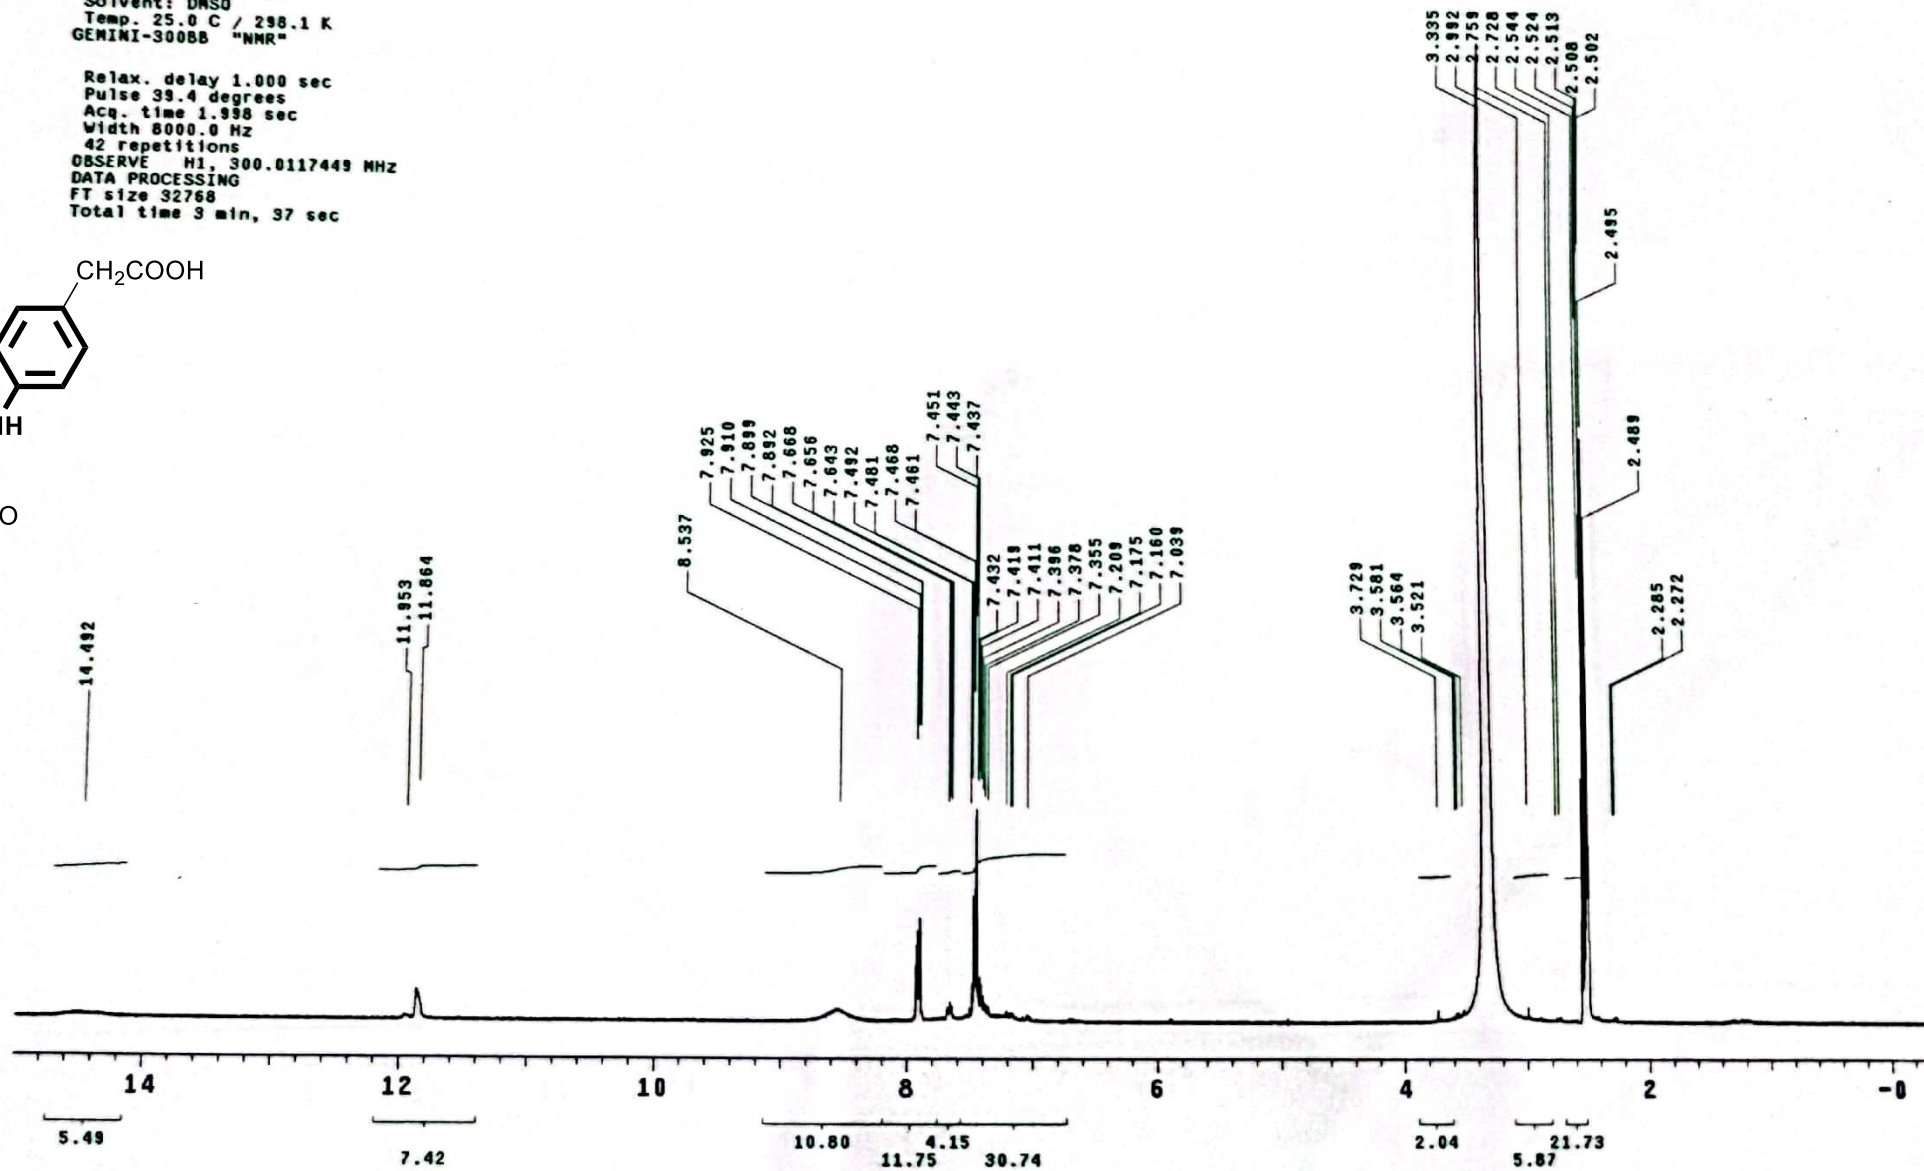

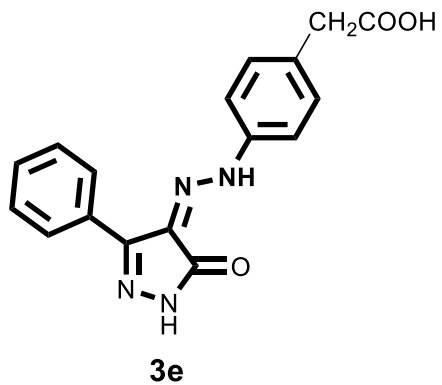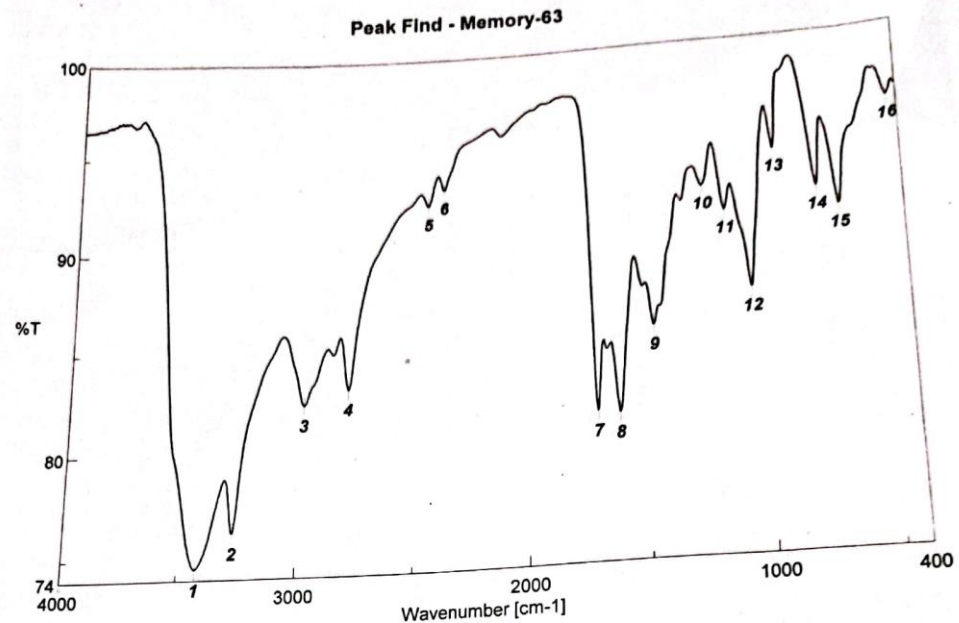

[Comments]  
 Sample name MD 11  
 Comment 12/12/2012  
 User IR  
 Division IR  
 Company Micro Analytical Center

[ Result of Peak Picking ]

| No. | Position | Intensity | No. | Position | Intensity | No. | Position | Intensity |
|-----|----------|-----------|-----|----------|-----------|-----|----------|-----------|
| 1   | 3421.1   | 74.534    | 2   | 3268.75  | 76.1832   | 3   | 2973.7   | 82.2455   |
| 4   | 2782.78  | 82.9325   | 5   | 2439.51  | 92.0784   | 6   | 2369.12  | 92.8806   |
| 7   | 1709.59  | 81.1071   | 8   | 1617.98  | 80.9596   | 9   | 1470.46  | 85.0764   |
| 10  | 1247.72  | 92.0117   | 11  | 1156.12  | 90.6488   | 12  | 1055.84  | 86.6001   |
| 13  | 935.306  | 93.7165   | 14  | 759.816  | 91.5939   | 15  | 669.178  | 90.5794   |
| 16  | 439.69   | 96.0167   |     |          |           |     |          |           |

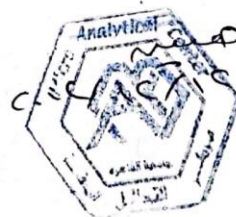

Soha Ramadan-MD12-Cnmr

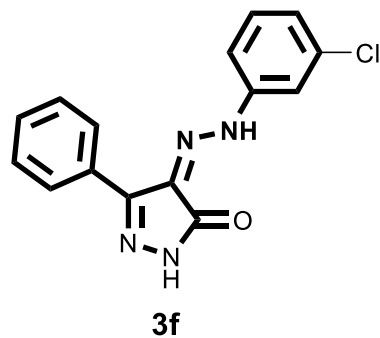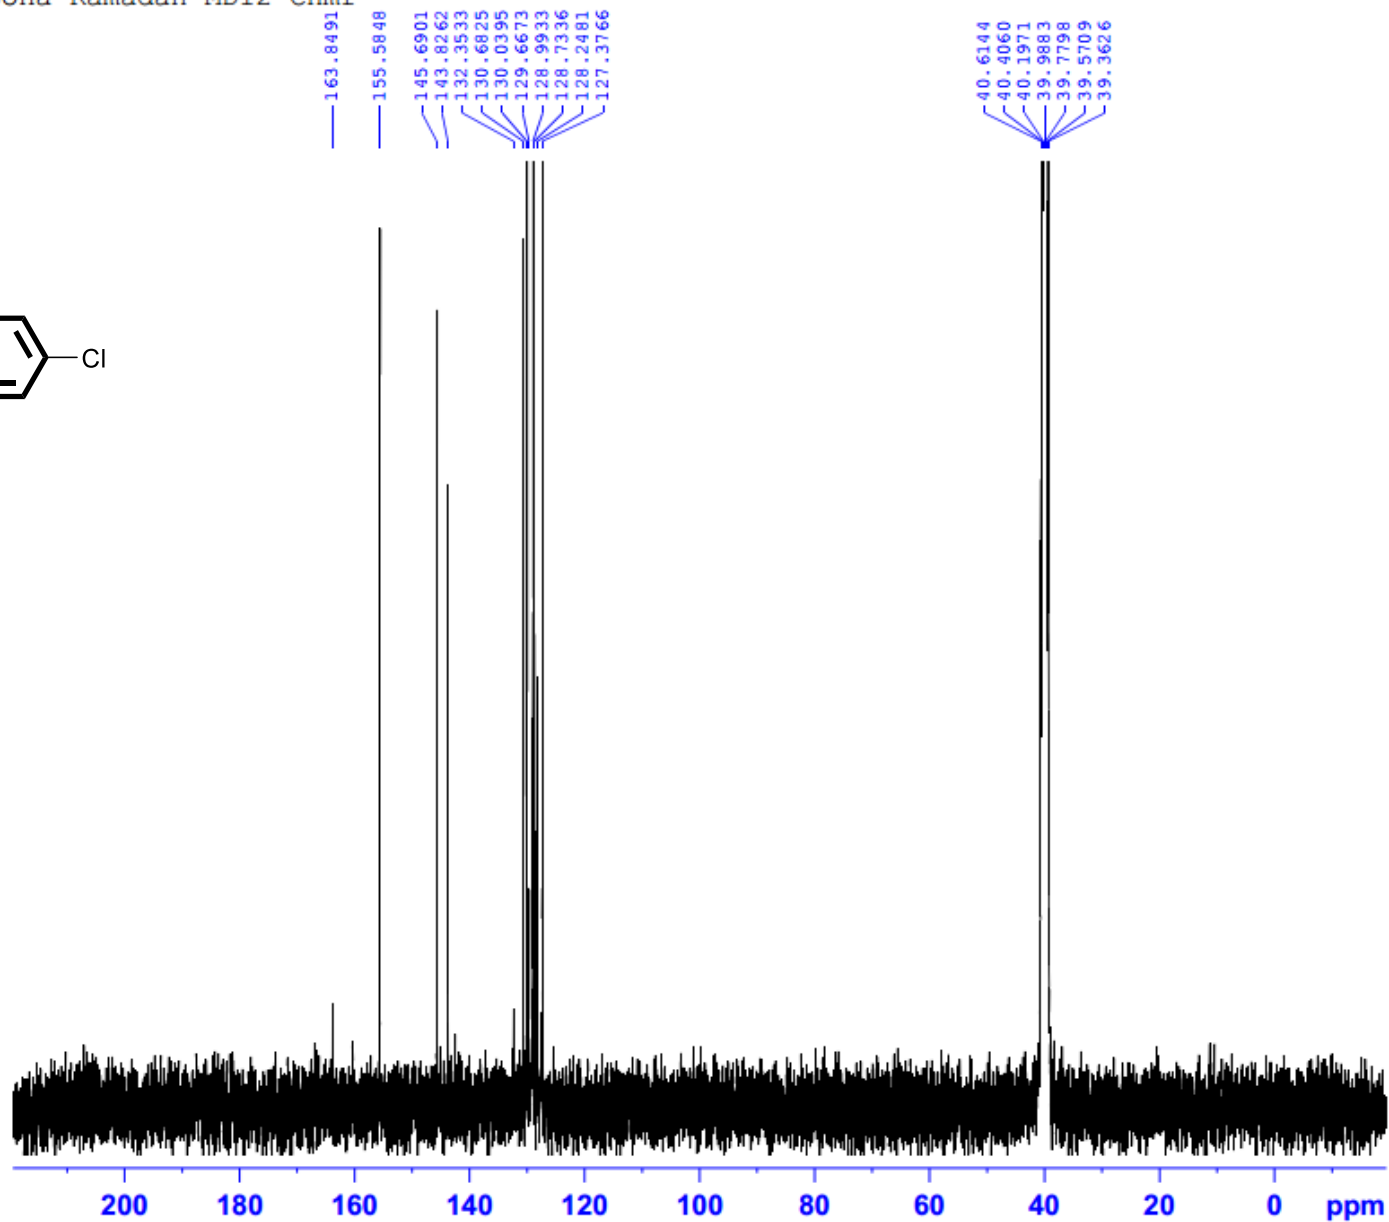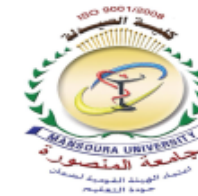

Current Data Parameters  
NAME Soha Ramadan-MD12-Cnmr-ow  
EXPNO 10  
PROCNO 1

F2 - Acquisition Parameters  
Date\_ 20220806  
Time 18.23 h  
INSTRUM spect  
PROBHD Z108618\_0945 ( )  
PULPROG zgpg30  
TD 65536  
SOLVENT DMSO  
NS 2200  
DS 4  
SWH 24038.461 Hz  
FIDRES 0.733596 Hz  
AQ 1.3631488 sec  
RG 197.77  
DW 20.800 usec  
DE 6.50 usec  
TE 300.1 K  
D1 2.00000000 sec  
D11 0.03000000 sec  
TDO 1  
SFO1 100.6404331 MHz  
NUC1 13C  
P1 10.00 usec  
PLW1 47.00000000 W  
SFO2 400.2016008 MHz  
NUC2 1H  
CPDPRG[2] waltz16  
PCPD2 90.00 usec  
PLW2 13.00000000 W  
PLW12 0.29249999 W  
PLW13 0.14713000 W

F2 - Processing parameters  
SI 32768  
SF 100.6303700 MHz  
WDW EM  
SSB 0  
LB 1.00 Hz  
GB 0  
PC 1.40



Dr. Dalia Soliman-MD12-H1-DMSO-Main. Defence. Chemical. Laboratory

Pulse Sequence: s2pu1  
Solvent: DMSO  
Temp: 25.0 C / 298.1 K  
GENI-30088 "NMR"

Relax. delay 1.000 sec  
Pulse 39.4 degrees  
Acq. time 1.998 sec  
Width 8000.0 Hz  
18 repetitions  
OBSERVE H1, 300.0117449 MHz  
DATA PROCESSING  
FT size 32768  
Total time 3 min, 37 sec

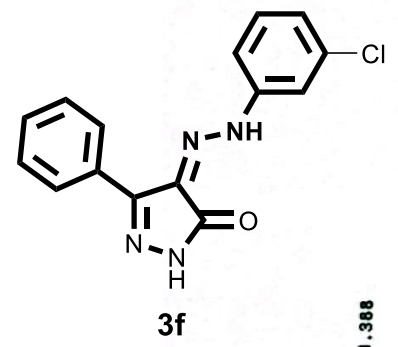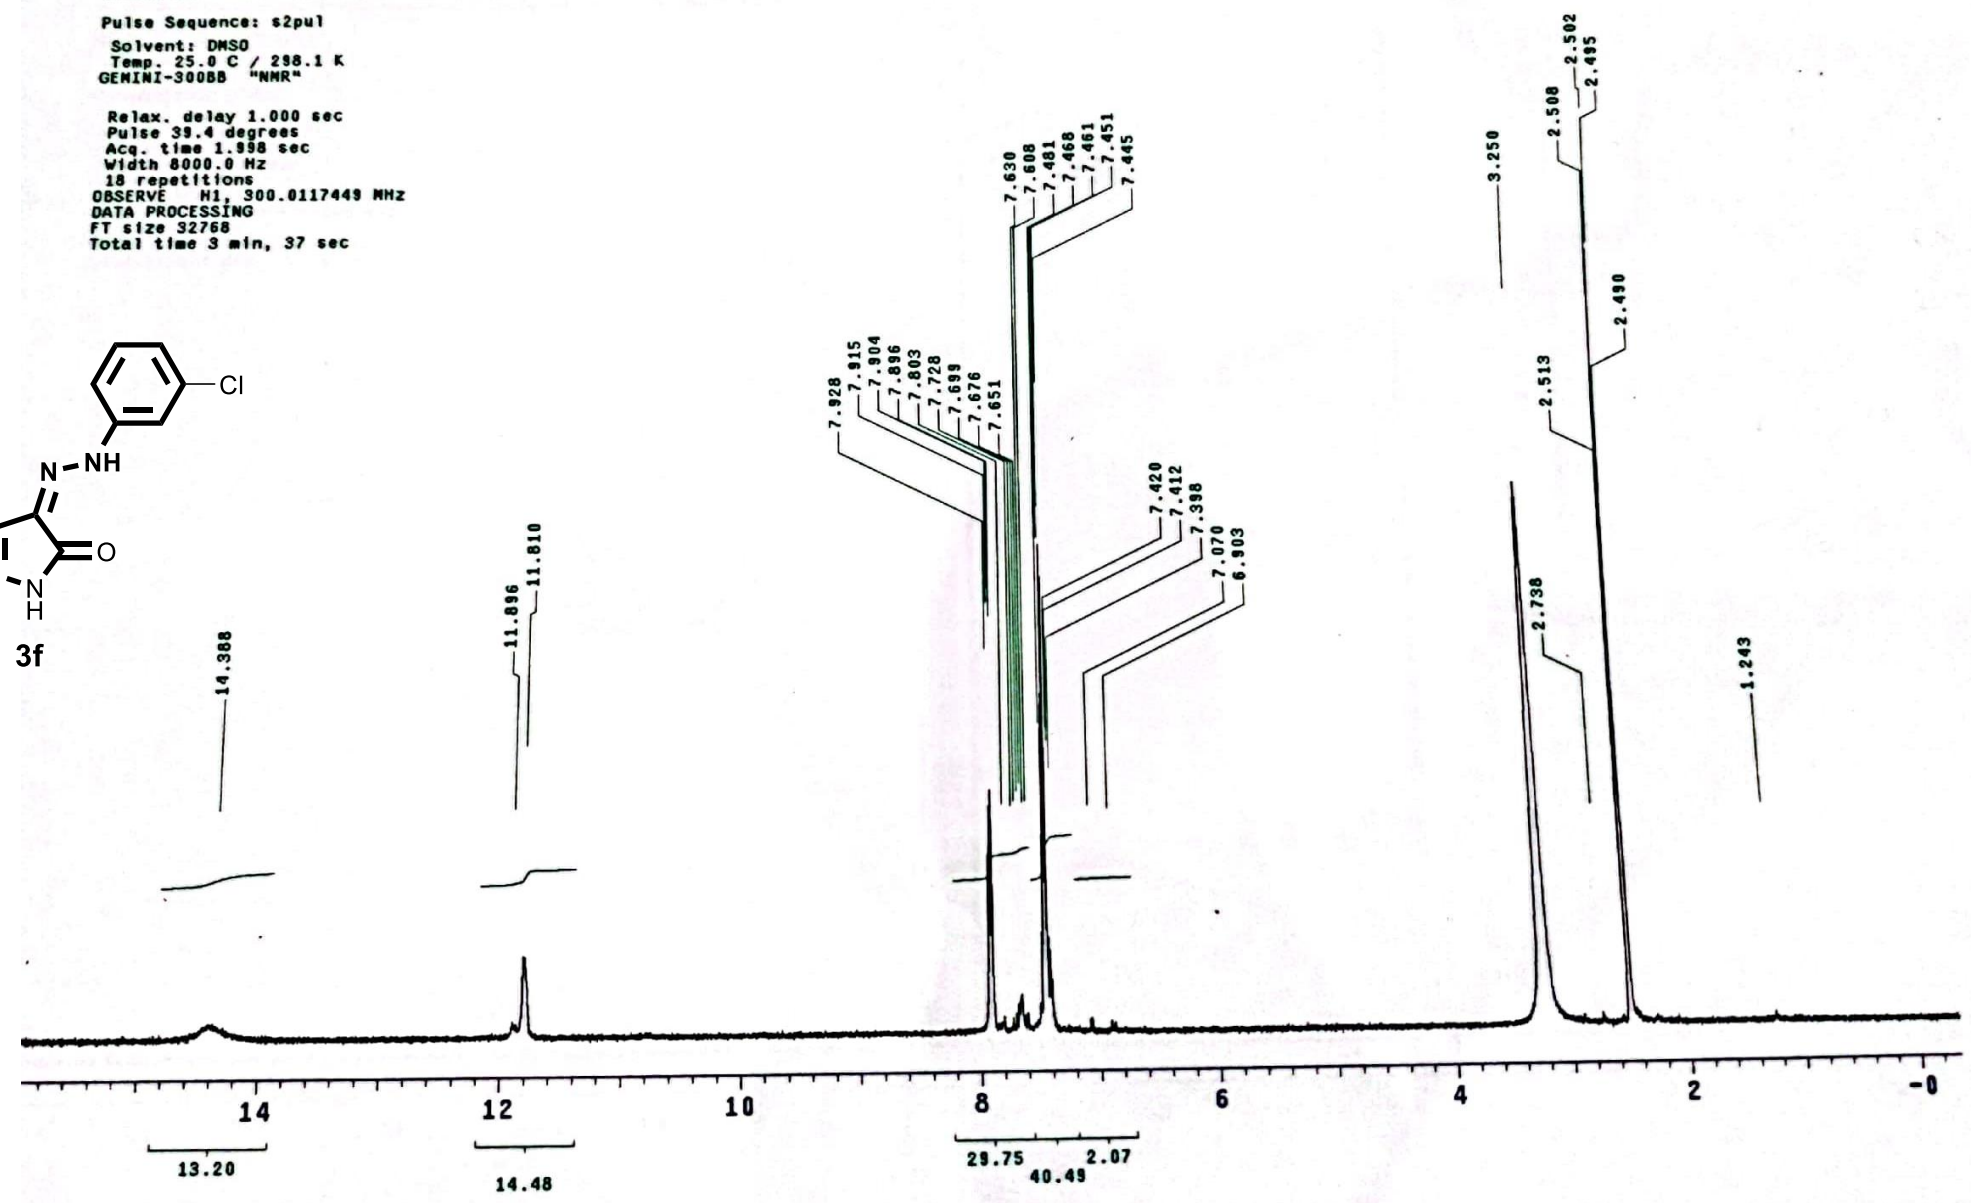

Dalia soliman-MD5-Carbon-DMSO-ES

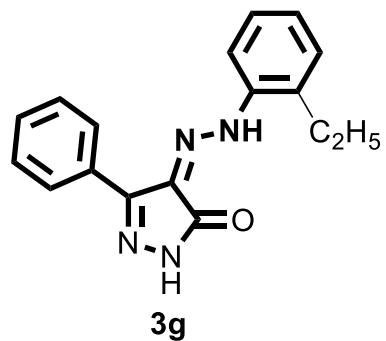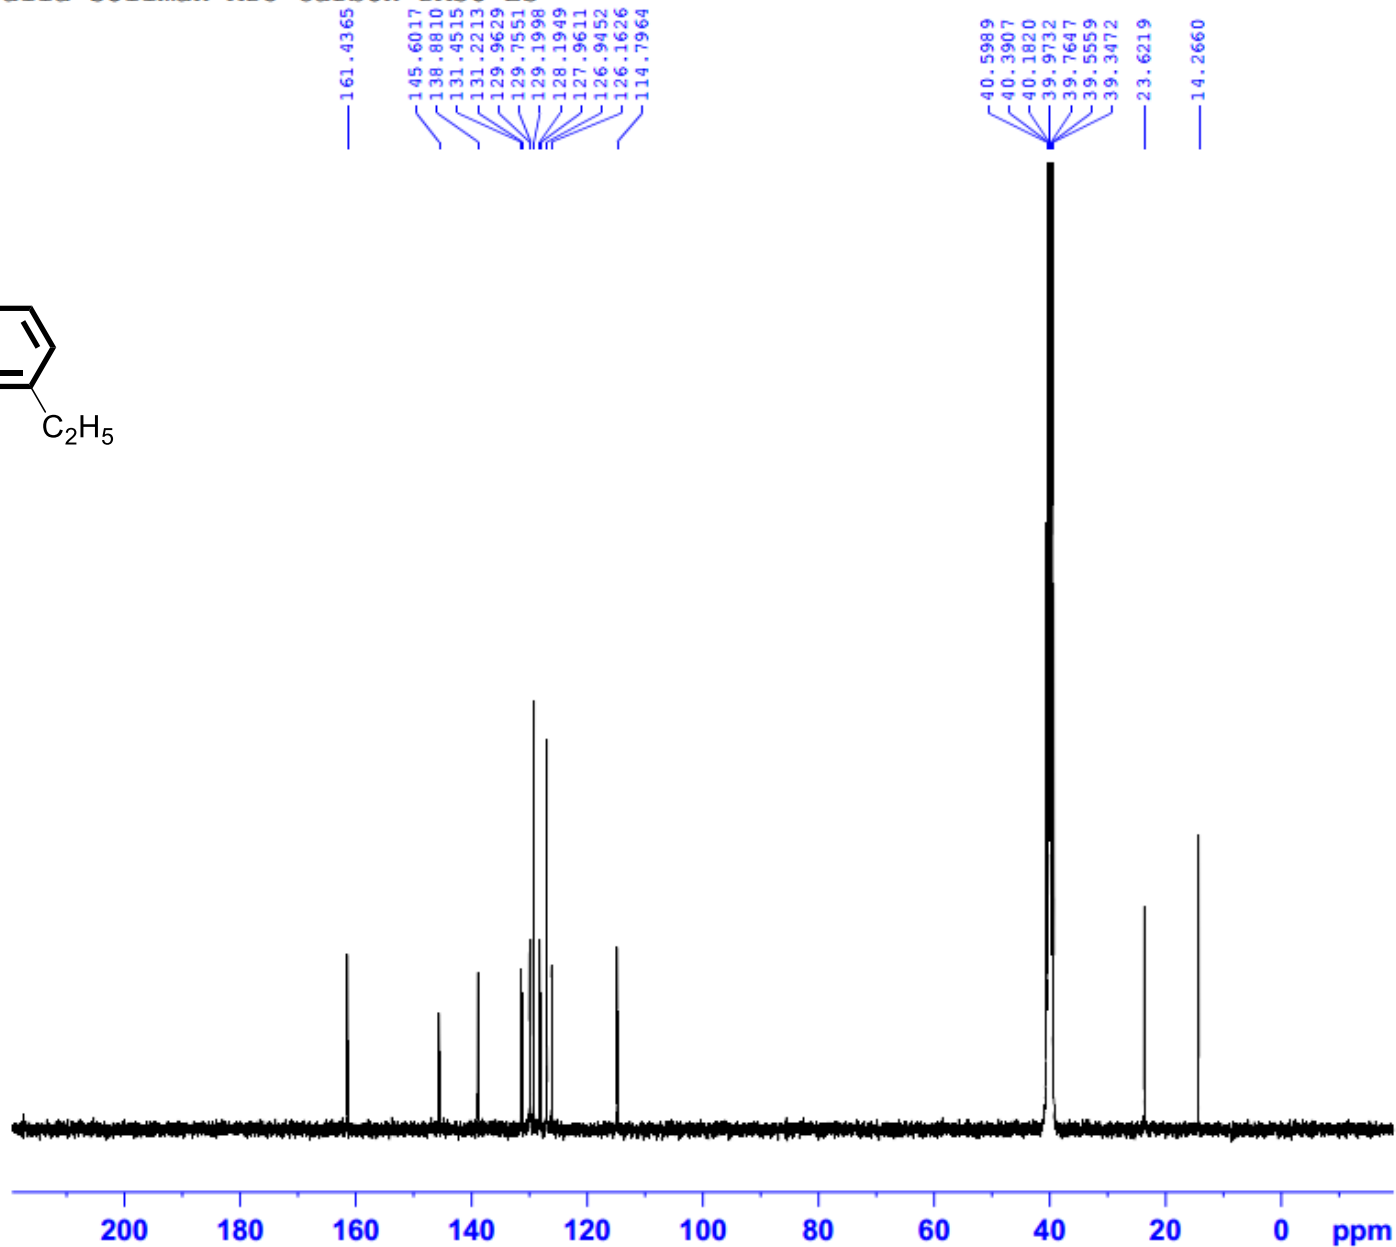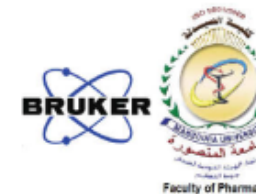

```

Current Data Parameters
NAME      Dalia soliman-MD5-Carbon-DMSO-ES
EXPNO    10
PROCNO    1

F2 - Acquisition Parameters
Date_     20220511
Time      9.07 h
INSTRUM   spect
PROBHD    Z106618_0945 (
PULPROG   zgpg30
TD         65536
SOLVENT   DMSO
NS         2200
DS         4
SWH        24038.461 Hz
FIDRES     0.733596 Hz
AQ         1.3631488 sec
RG         197.77
DW         20.800 usec
DE         6.50 usec
TE         295.8 K
D1         2.0000000 sec
d11        0.0300000 sec
TDO        1
SFO1       100.6404331 MHz
NUC1       13C
P1         10.00 usec
PLW1       47.0000000 W
SFO2       400.2016008 MHz
NUC2       1H
CPDPRG2   waltz16
PCPD2     90.00 usec
PLW2       13.0000000 W
PLW12     0.29249999 W
PLW13     0.14713000 W

F2 - Processing parameters
SI         32768
SF         100.6303700 MHz
WDW        EM
SSB        0
LB         1.00 Hz
GB         0
PC         1.40
    
```

Dr. Dalila Soliman-MD5-H1-DMSO-Main.Defence.Chemical.Laboratory

Pulse Sequence: s2pu1

Solvent: DMSO  
Temp. 25.0 C / 298.1 K  
GEMINI-300BB "NMR"

Relax. delay 1.000 sec  
Pulse 39.4 degrees  
Acq. time 1.998 sec  
Width 8000.0 Hz  
18 repetitions  
OBSERVE H1, 300.0117449 MHz  
DATA PROCESSING  
FT size 32768  
Total time 3 min, 37 sec

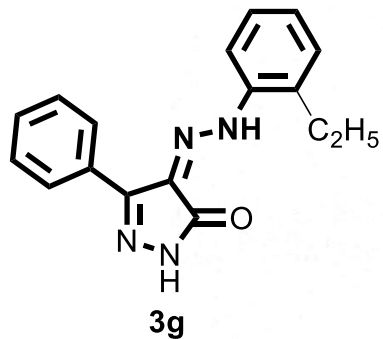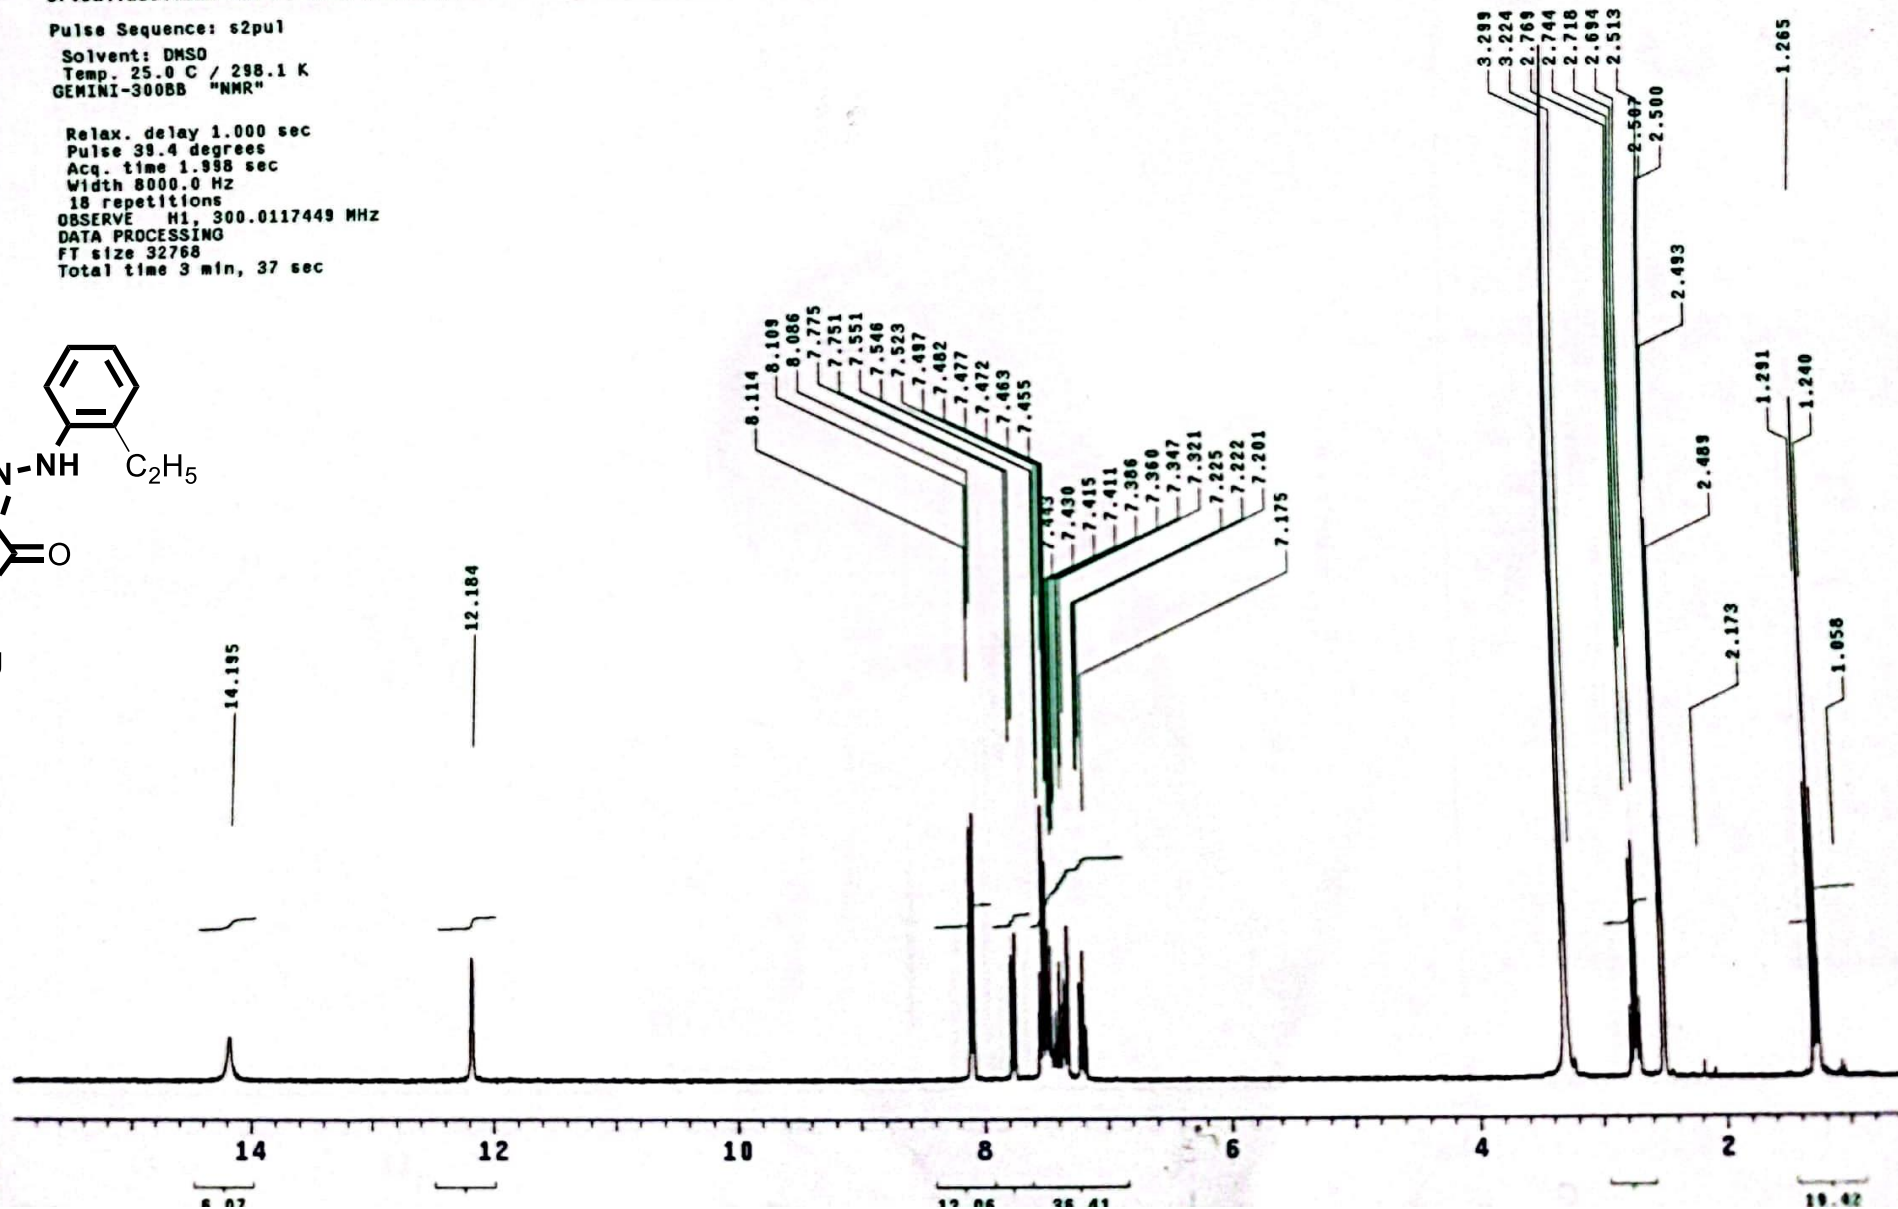

Dalia soliman-MD1-Carbon-DMSO-ES

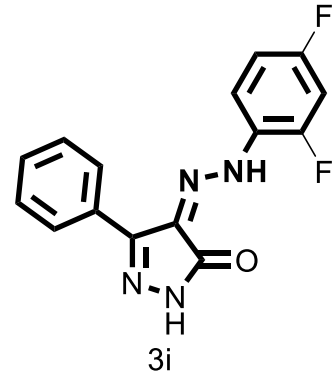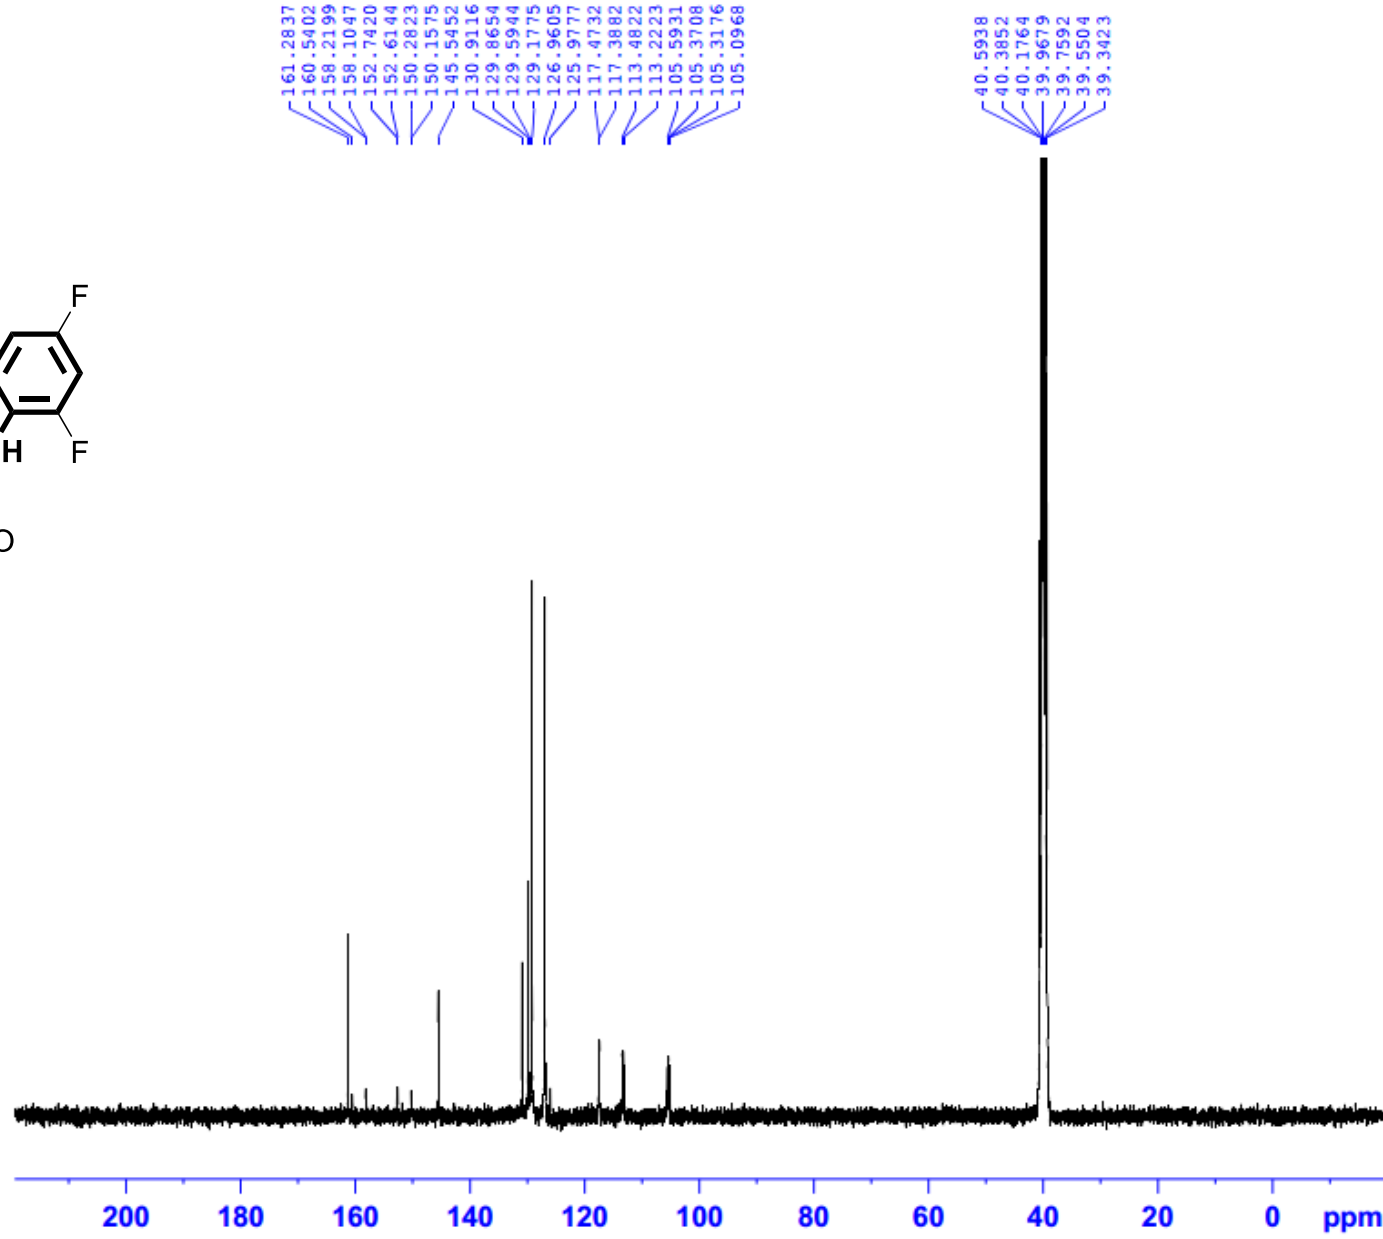

161.2837  
160.5402  
158.2199  
158.1047  
152.7420  
152.6144  
150.2823  
150.1575  
145.5452  
130.9116  
129.8654  
129.5944  
129.1775  
126.9605  
125.9777  
117.4732  
117.3882  
113.8822  
113.2223  
105.5931  
105.3708  
105.3176  
105.0968

40.5838  
40.3852  
40.1764  
39.9679  
39.7592  
39.5504  
39.3423

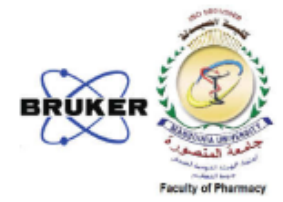

Current Data Parameters  
NAME Dalia soliman-MD1-Carbon-DMSO-ES  
EXPNO 10  
PROCNO 1

F2 - Acquisition Parameters  
Date\_ 20220511  
Time 2.40 h  
INSTRUM spect  
PROBHD z108618\_0945 (z  
PULPROG zgpg30  
TD 65536  
SOLVENT DMSO  
NS 2200  
DS 4  
SWH 24038.461 Hz  
FIDRES 0.733596 Hz  
AQ 1.3631488 sec  
RG 197.77  
DW 20.800 usec  
DE 6.50 usec  
TE 296.0 K  
D1 2.0000000 sec  
D11 0.0300000 sec  
TD0 1  
SFO1 100.6404331 MHz  
NUC1 13C  
P1 10.00 usec  
PLM1 47.0000000 W  
SFO2 400.2016008 MHz  
NUC2 1H  
CPOPRG[2] waltz16  
PCPD2 90.00 usec  
PLM2 13.0000000 W  
PLM12 0.29249999 W  
PLM13 0.14713000 W

F2 - Processing parameters  
SI 32768  
SF 100.6303700 MHz  
WDW EM  
SSB 0  
LB 1.00 Hz  
GB 0  
PC 1.40

Dalia soliman-MD10-DMSO-C13nmr-A

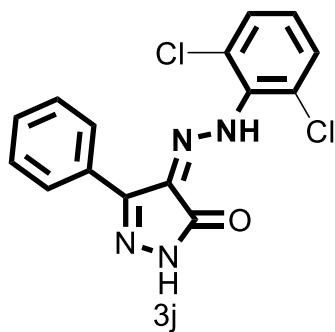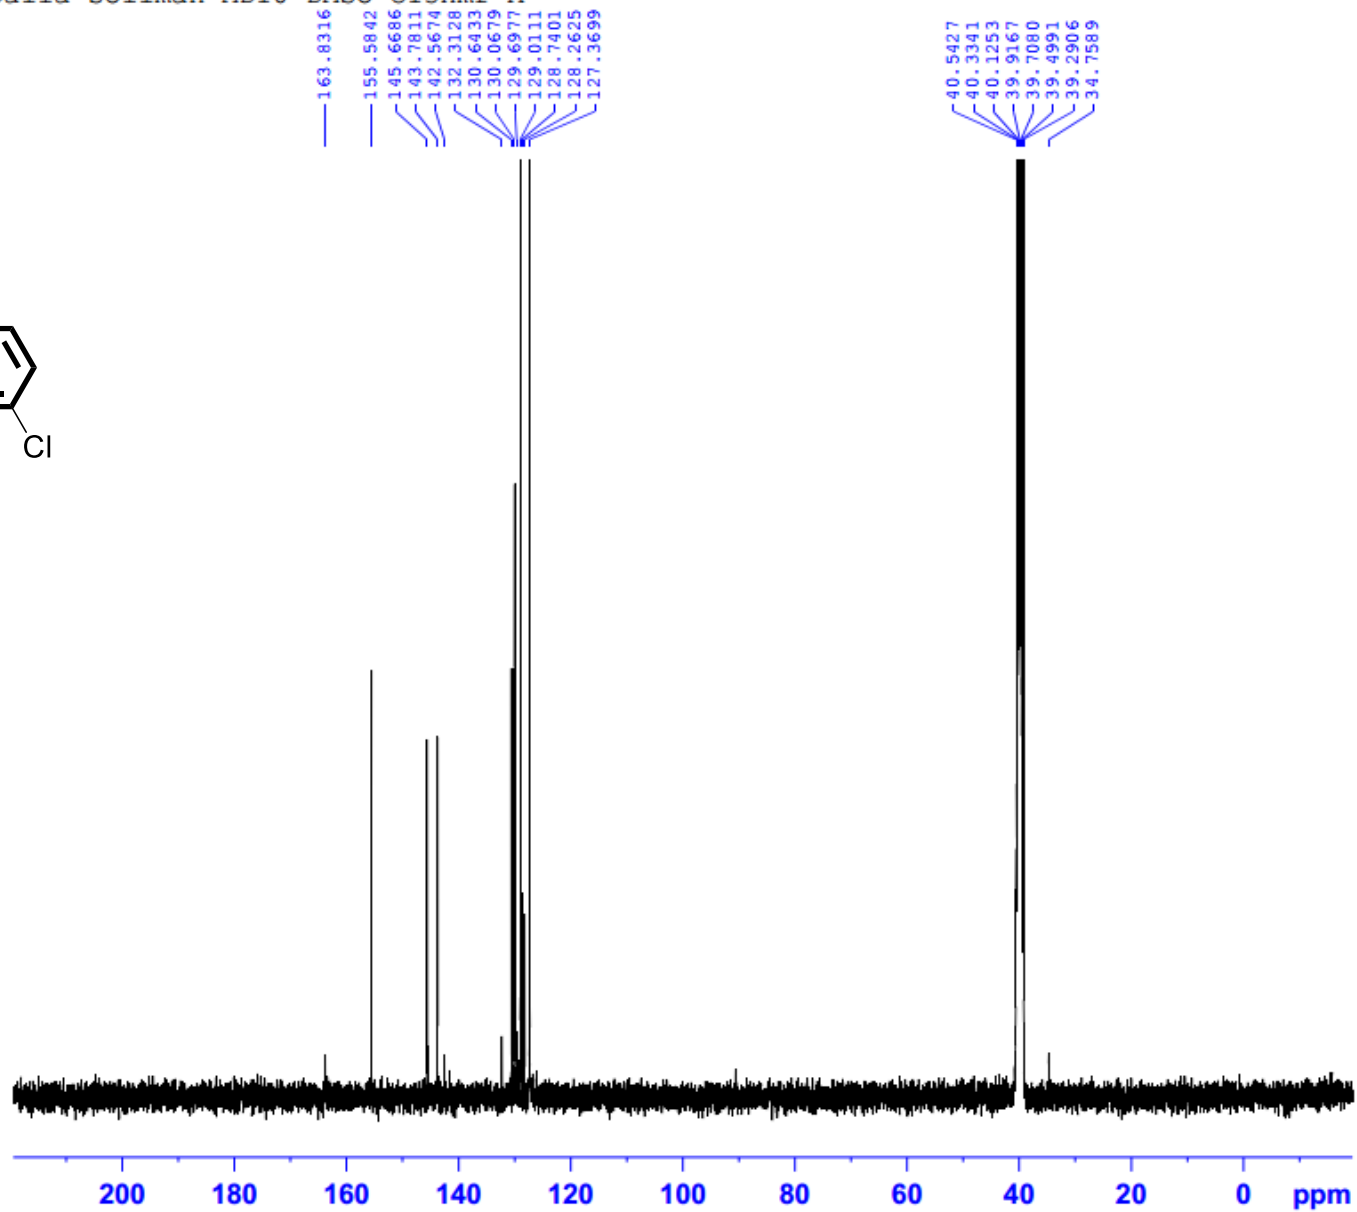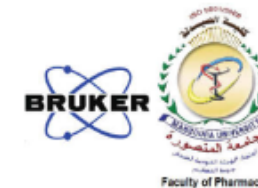

Current Data Parameters  
 NAME Dalia soliman-MD10-DMSO-C13nmr-A  
 EXPNO 10  
 PROCNO 1

F2 - Acquisition Parameters  
 Date\_ 20220514  
 Time 7.06 h  
 INSTRUM spect  
 FREQID 1108618 0945 ( MHz)  
 PULPROG zgpg30  
 TD 65536  
 SOLVENT DMSO  
 NS 2200  
 DS 4  
 SWH 24038.461 Hz  
 FIDRES 0.733596 Hz  
 AQ 1.3631488 sec  
 RG 197.77  
 DW 20.800 usec  
 DE 6.50 usec  
 TE 294.0 K  
 D1 2.0000000 sec  
 D11 0.0300000 sec  
 TDO 1  
 SFO1 100.6404331 MHz  
 NUC1 13C  
 P1 10.00 usec  
 PLW1 47.0000000 W  
 SFO2 400.2016008 MHz  
 NUC2 1H  
 CPDPRG2 waltz16  
 PCPD2 90.00 usec  
 PLW2 13.0000000 W  
 PLW12 0.29249999 W  
 PLW13 0.14713000 W

F2 - Processing parameters  
 SI 32768  
 SF 100.6303700 MHz  
 WDW EM  
 SSB 0  
 LB 1.00 Hz  
 GB 0  
 PC 1.40

Dr. Dalia Soliman-MD10-H1-DMSO-Main. Defence. Chemical. Laboratory

Pulse Sequence: s2pu1

Solvent: DMSO  
Temp. 25.0 C / 298.1 K  
GEMINI-300BB "NMR"

Relax. delay 1.000 sec  
Pulse 39.4 degrees  
Acq. time 1.998 sec  
Width 8000.0 Hz  
42 repetitions  
OBSERVE H1, 300.0117449 MHz  
DATA PROCESSING  
FT size 32768  
Total time 3 min, 37 sec

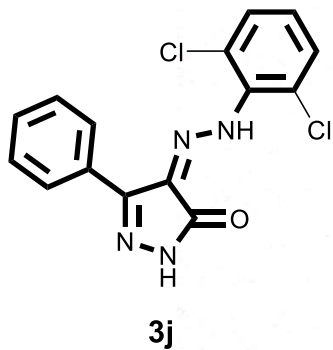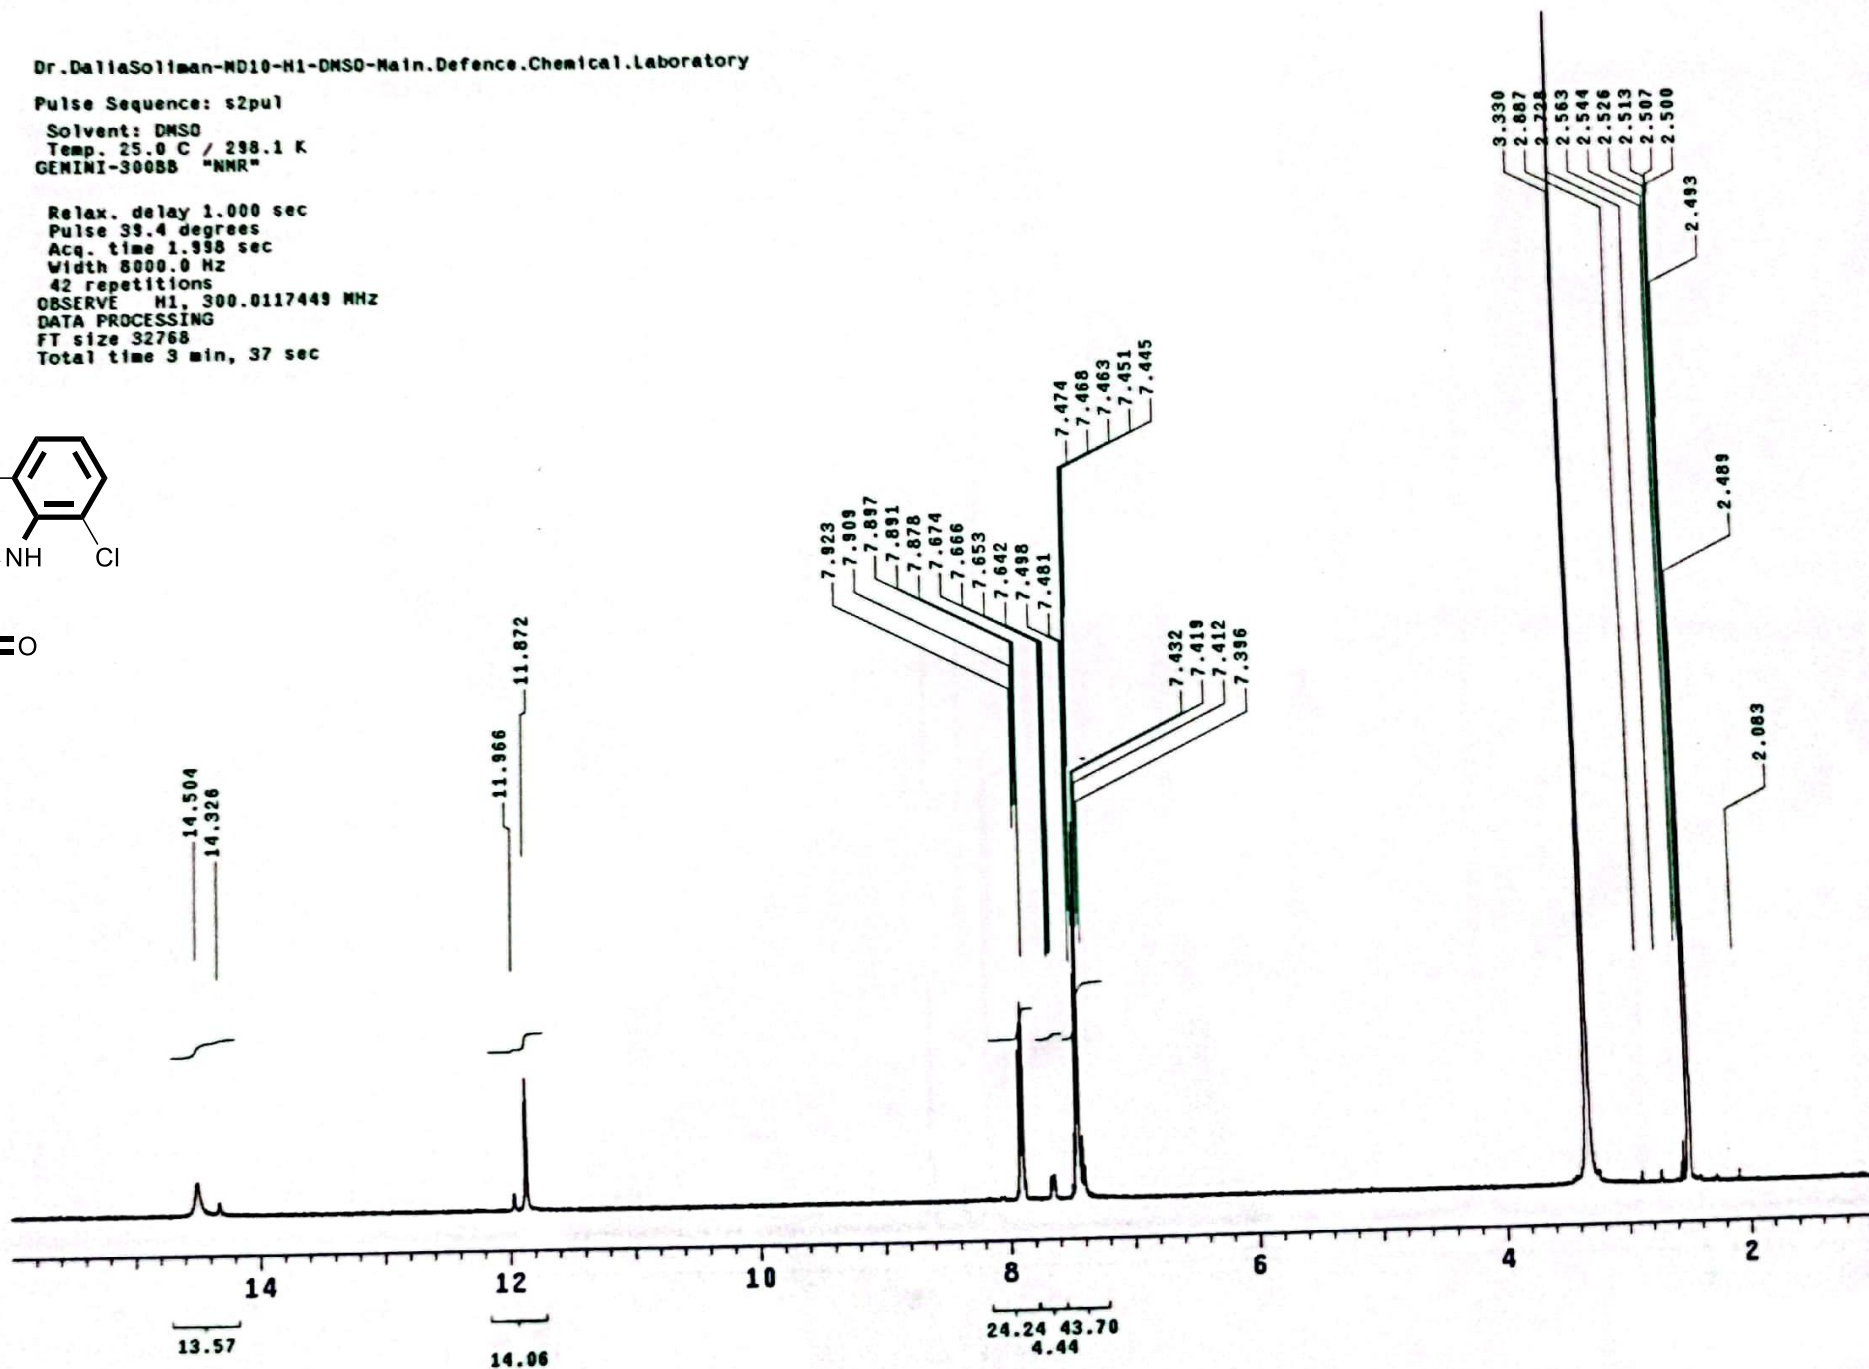



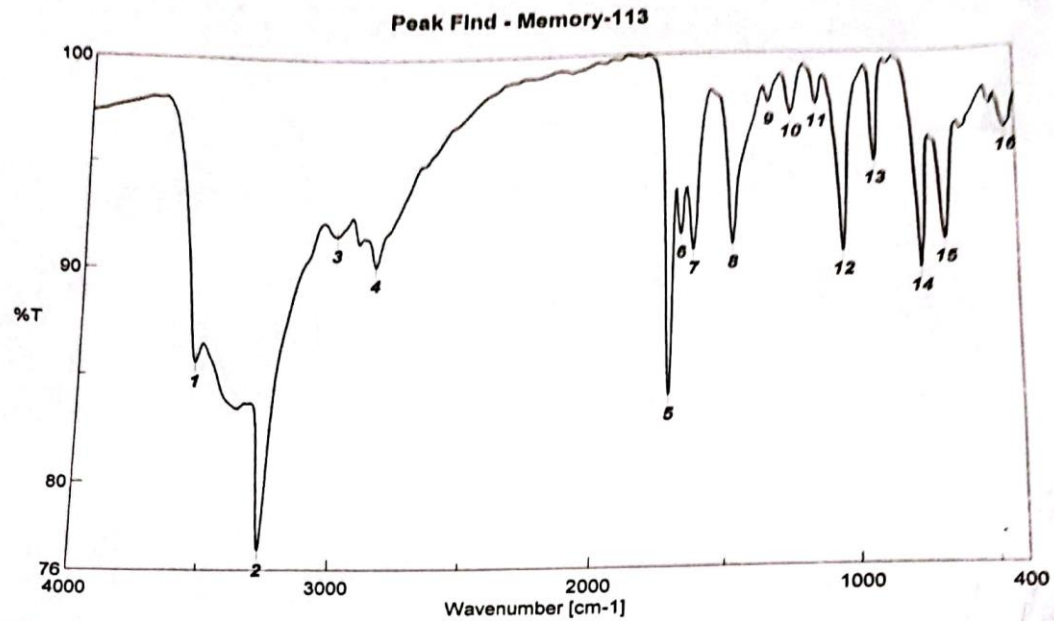

[Comments]  
 Sample name MD 10  
 Comment 12/12/2012  
 User IR  
 Division IR  
 Company Micro Analytical Center

[ Result of Peak Picking ]

| No. | Position | Intensity | No. | Position | Intensity | No. | Position | Intensity |
|-----|----------|-----------|-----|----------|-----------|-----|----------|-----------|
| 1   | 3543.56  | 85.5363   | 2   | 3269.72  | 76.8953   | 3   | 3009.37  | 91.4156   |
| 4   | 2853.17  | 89.9321   | 5   | 1714.41  | 83.6458   | 6   | 1670.05  | 91.0971   |
| 7   | 1622.8   | 90.3407   | 8   | 1475.28  | 90.5472   | 9   | 1338.36  | 97.5105   |
| 10  | 1254.47  | 96.8972   | 11  | 1155.15  | 97.401    | 12  | 1057.76  | 90.1593   |
| 13  | 933.378  | 94.5632   | 14  | 762.709  | 89.3672   | 15  | 669.178  | 90.7441   |
| 16  | 434.869  | 96.0791   |     |          |           |     |          |           |

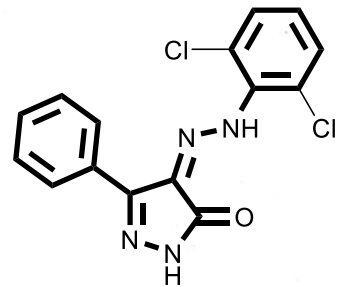

3j

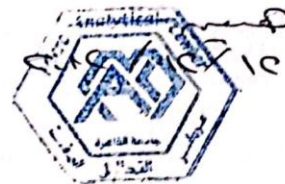

Dalia soliman-MD7-Carbon-DMSO-ES

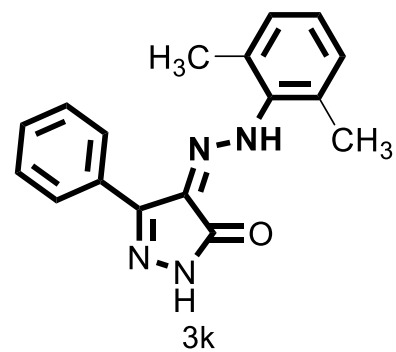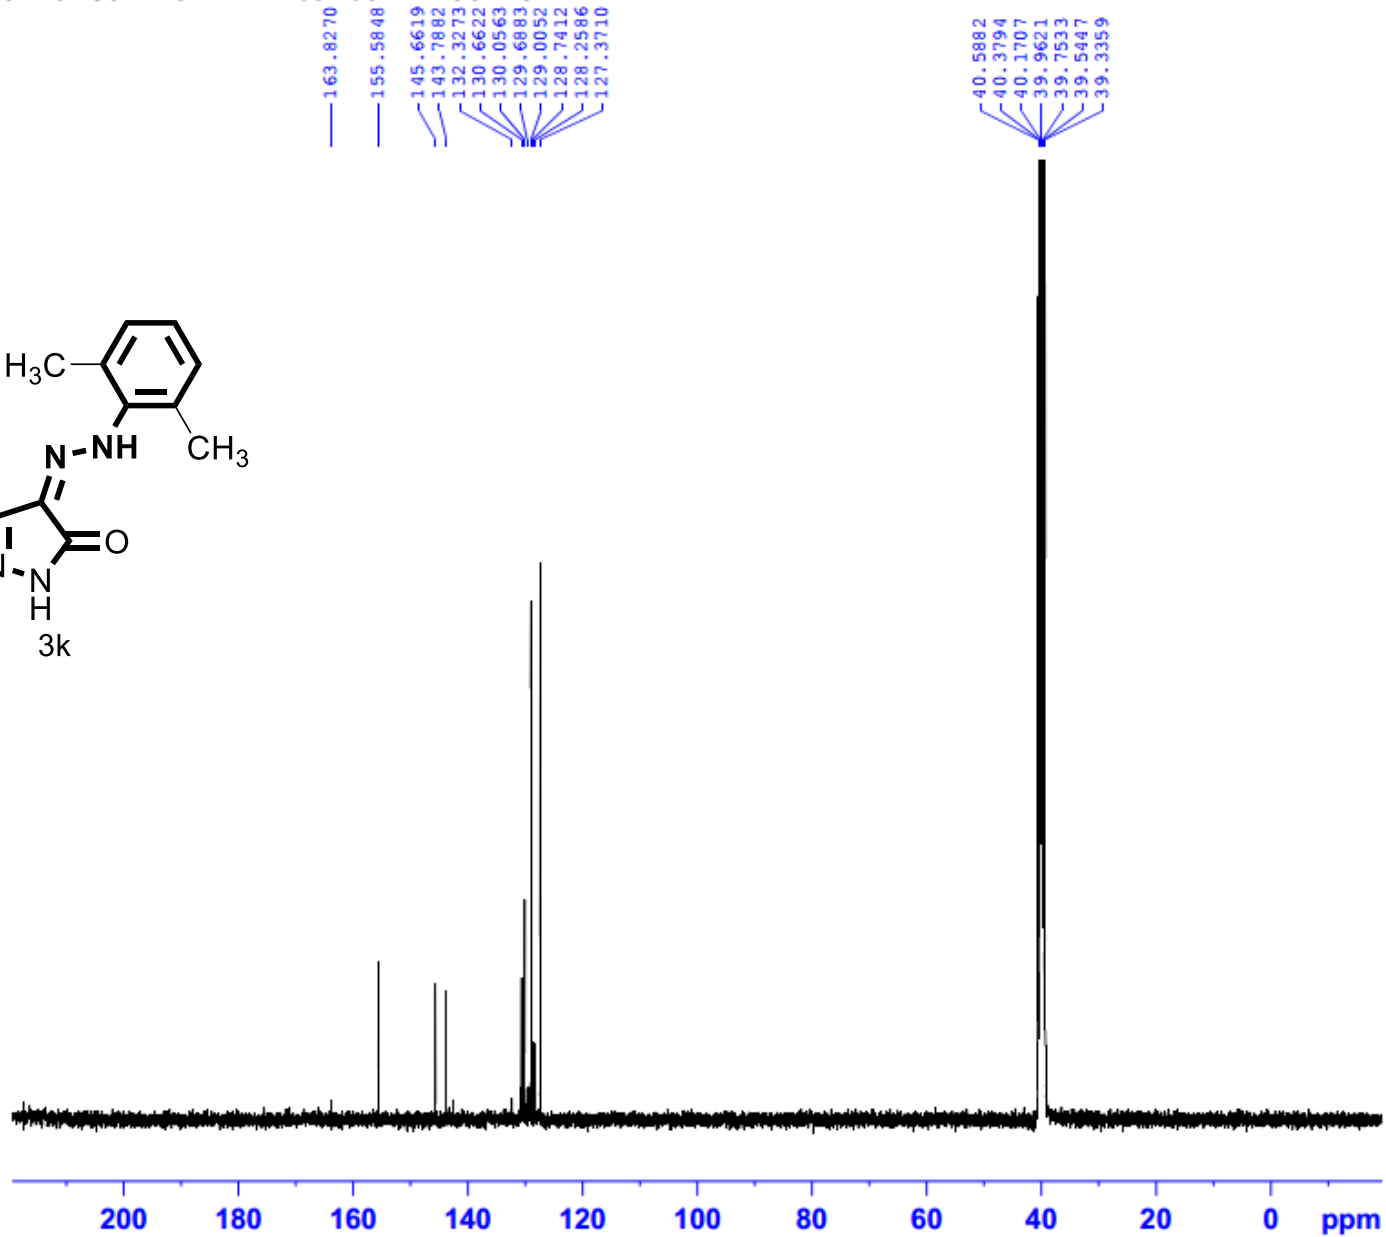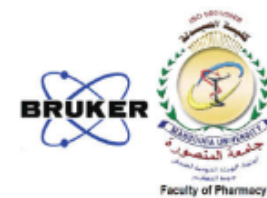

Current Data Parameters  
NAME Dalia soliman-MD7-Carbon-DMSO-ES  
EXPNO 10  
PROCNO 1

F2 - Acquisition Parameters  
Date\_ 20220511  
Time 6.58 h  
INSTRUM spect  
PROBHD z108618\_0945 (z  
PULPROG zgpg30  
TD 65536  
SOLVENT DMSO  
NS 2200  
DS 4  
SWH 24038.461 Hz  
FIDRES 0.733596 Hz  
AQ 1.3631488 sec  
RG 197.77  
EW 20.800 usec  
DE 6.50 usec  
TE 295.8 K  
D1 2.00000000 sec  
D11 0.03000000 sec  
TD0 1  
SFO1 100.6404331 MHz  
NUC1 13C  
P1 10.00 usec  
PLM1 47.00000000 W  
SFO2 400.2016008 MHz  
NUC2 1H  
CPDPRG2 waltz16  
PCPD2 90.00 usec  
PLM2 13.00000000 W  
PLM12 0.29249999 W  
PLM13 0.14713000 W

F2 - Processing parameters  
SI 32768  
SF 100.6303700 MHz  
WDW EM  
SSB 0  
LB 1.00 Hz  
GB 0  
PC 1.40



Dr. DaliaSoliman-ND7-H1-DMSO-Main.Defence  
 .Chemical.Laboratory

expl std1h

SAMPLE DEC. & VT  
 date Jan 9 2013 dfrq 300.013  
 solvent DMSO dn H1  
 file /export/home/~ dpwr 30  
 vnmr1/M.Afif13/Dr.~ dof 0  
 DaliaSoliman-ND7-H~ dm nnn  
 l-DMSO-Main.Defenc~ dnm c  
 e.Chemical.Laborat~ dmf 200  
 ory.fid temp 25.0

ACQUISITION PROCESSING  
 sfrq 300.013 wfile  
 tn H1 proc ft  
 at 1.898 fn not used  
 np 31968  
 sw 8000.0 werr  
 fb 4400 wexp  
 bs 6 wbs wft aph  
 tpwr 52 wnt  
 pw 7.0  
 dl 1.000  
 tof 0  
 nt 64  
 ct 24  
 alock n  
 gain not used

FLAGS  
 ll n  
 ln n  
 dp y

DISPLAY  
 sp -303.3  
 wp 5102.4  
 vs 478  
 sc 0  
 vc 270  
 hzmm 18.90  
 ls 2078.99  
 rfl 2493.8  
 rfp 0  
 th 1  
 ins 100.000  
 nm ph

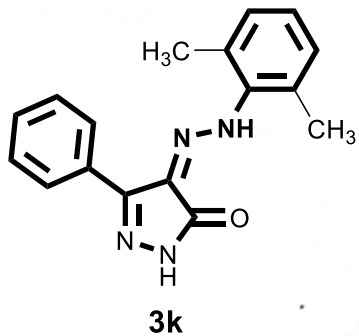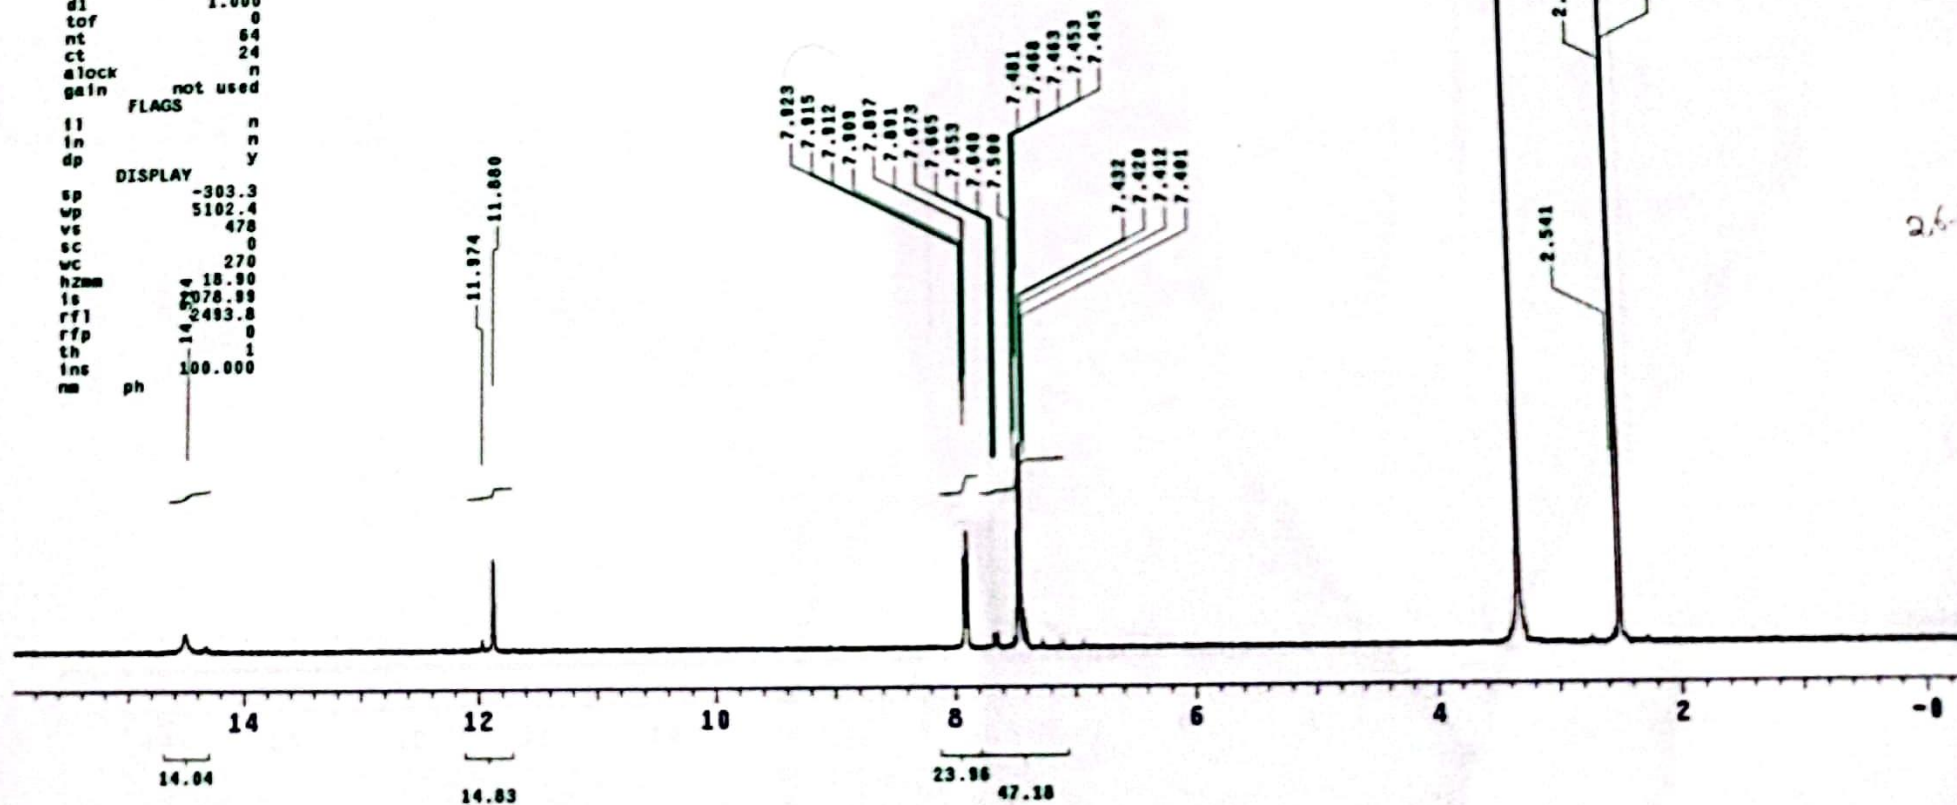

260

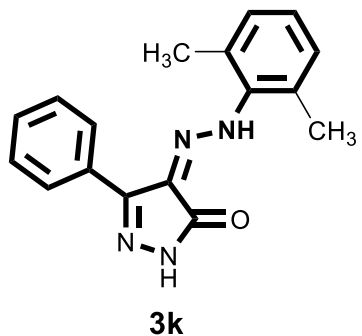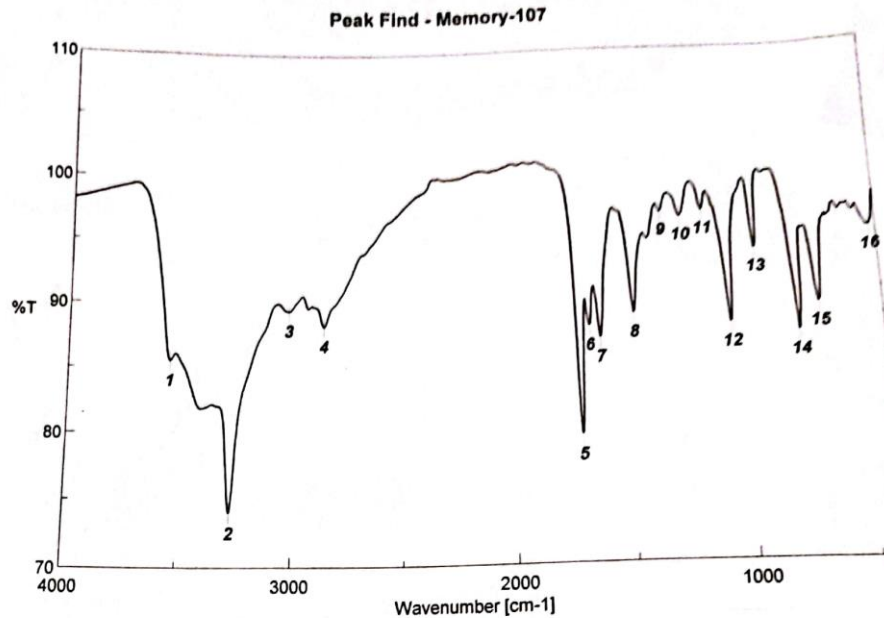

[Comments]  
 Sample name MD7  
 Comment 12/12/2012  
 User IR  
 Division IR  
 Company Micro Analytical Center

[ Result of Peak Picking ]

| No. | Position | Intensity | No. | Position | Intensity | No. | Position | Intensity |
|-----|----------|-----------|-----|----------|-----------|-----|----------|-----------|
| 1   | 3540.67  | 85.3871   | 2   | 3267.79  | 73.9667   | 3   | 3010.34  | 89.1254   |
| 4   | 2852.2   | 87.8833   | 5   | 1712.48  | 79.1504   | 6   | 1669.09  | 87.2955   |
| 7   | 1622.8   | 86.3832   | 8   | 1475.28  | 88.1398   | 9   | 1339.32  | 96.0209   |
| 10  | 1253.5   | 95.6034   | 11  | 1155.15  | 96.0779   | 12  | 1056.8   | 87.1685   |
| 13  | 933.378  | 92.9489   | 14  | 762.709  | 86.4947   | 15  | 670.142  | 88.6502   |
| 16  | 427.155  | 94.5296   |     |          |           |     |          |           |

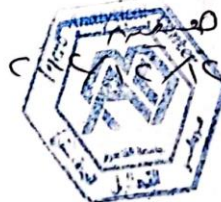

Dalia soliman-MD2-Carbon-DMSO-ES

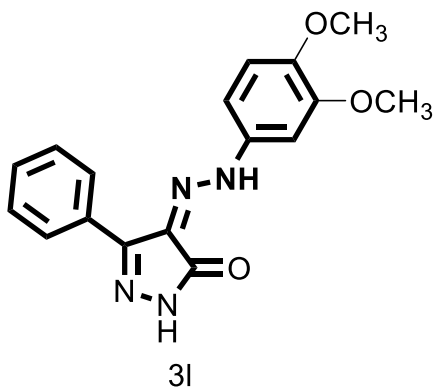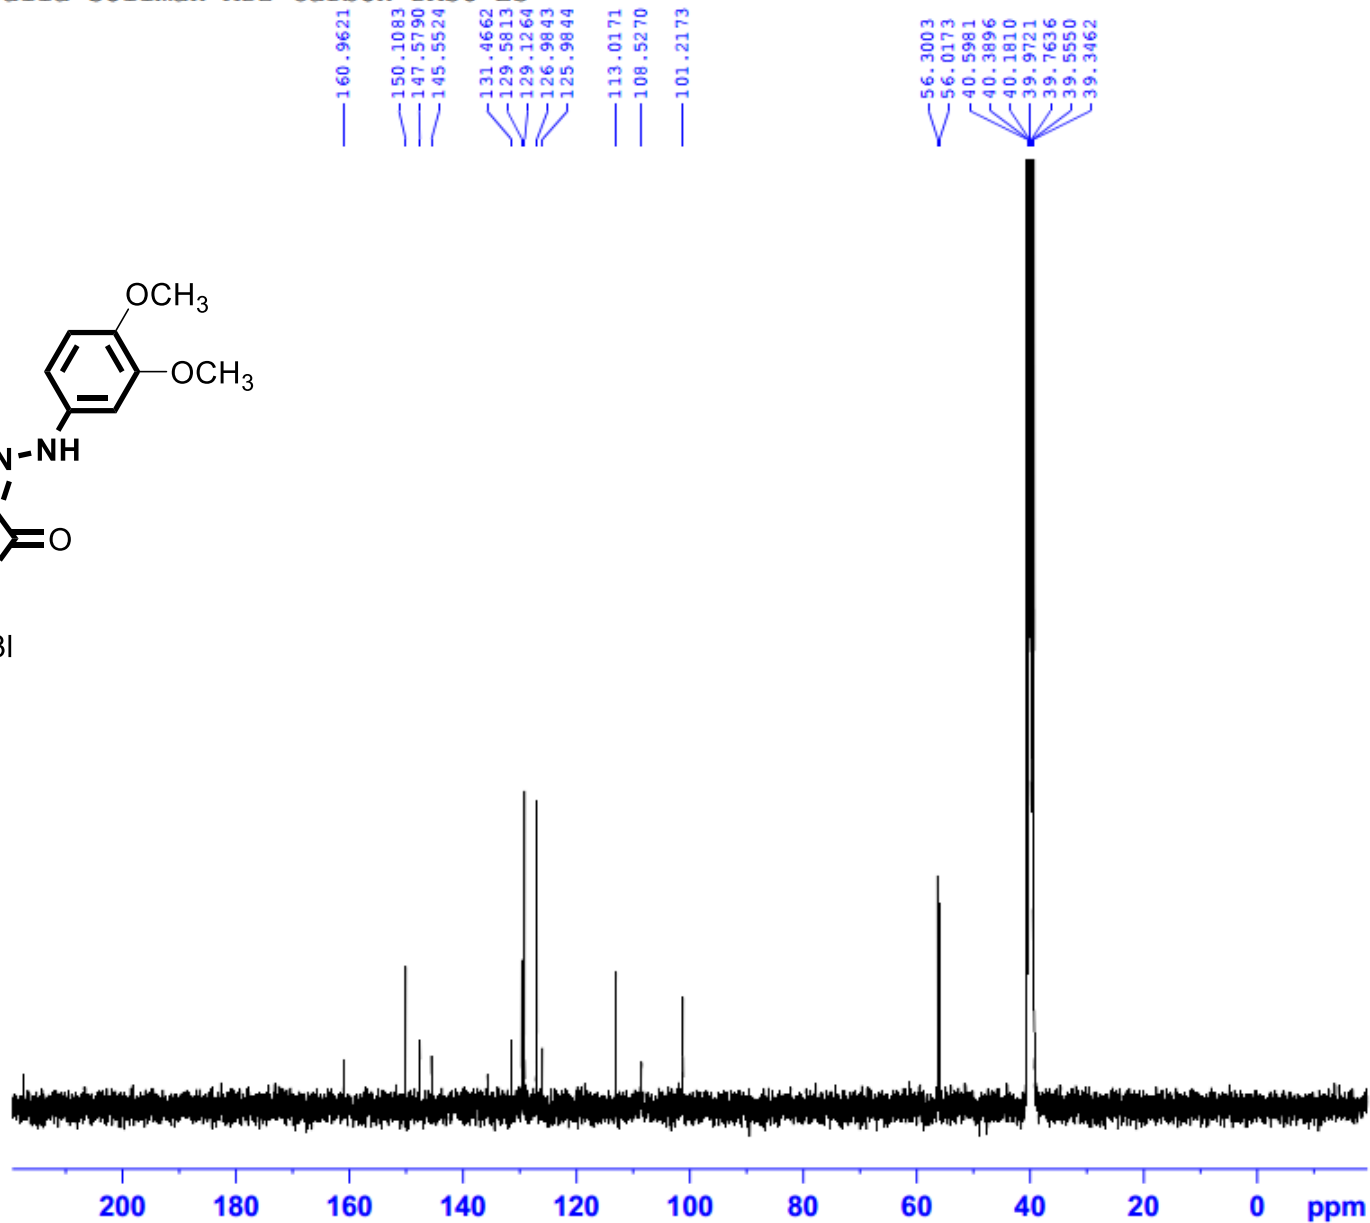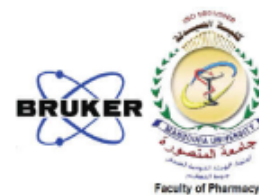

```

Current Data Parameters
NAME      Dalia soliman-MD2-Carbon-DMSO-ES
EXPNO    10
PROCNO   1

F2 - Acquisition Parameters
Date_    20220511
Time     4.49 h
INSTRUM  spect
PROBHD   Z108618_0945 (
PULPROG  zgpg30
TD       65536
SOLVENT  DMSO
NS       2200
DS       4
SWH      24038.461 Hz
FIDRES   0.733596 Hz
AQ       1.3631488 sec
RG       197.77
DW       20.800 usec
DE       6.50 usec
TE       295.7 K
D1       2.0000000 sec
D11      0.03000000 sec
TQ0      1
SFO1     100.6404331 MHz
NUC1     13C
P1       10.00 usec
PLM1     47.0000000 W
SFO2     400.2016008 MHz
NUC2     1H
CPDPRG2  waltz16
PCPD2    90.00 usec
PLM2     13.0000000 W
PLM12    0.29249999 W
PLM13    0.14713000 W

F2 - Processing parameters
SI       32768
SF       100.6303700 MHz
WDW      EM
SSB      0
LB       1.00 Hz
GB       0
PC       1.40
    
```

Dr. Dalia Soliman-MD2-H1-DMSO-Main Defence Chemical Laboratory

Pulse Sequence: s2pu1  
Solvent: DMSO  
Temp. 25.0 C / 298.1 K  
GEMINI-300BB "NMR"

Relax. delay 1.000 sec  
Pulse 39.4 degrees  
Acq. time 1.998 sec  
Width 8000.0 Hz  
30 repetitions  
OBSERVE H1, 300.0117449 MHz  
DATA PROCESSING  
FT size 32768  
Total time 3 min, 37 sec

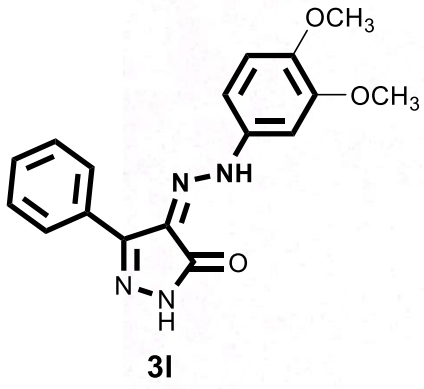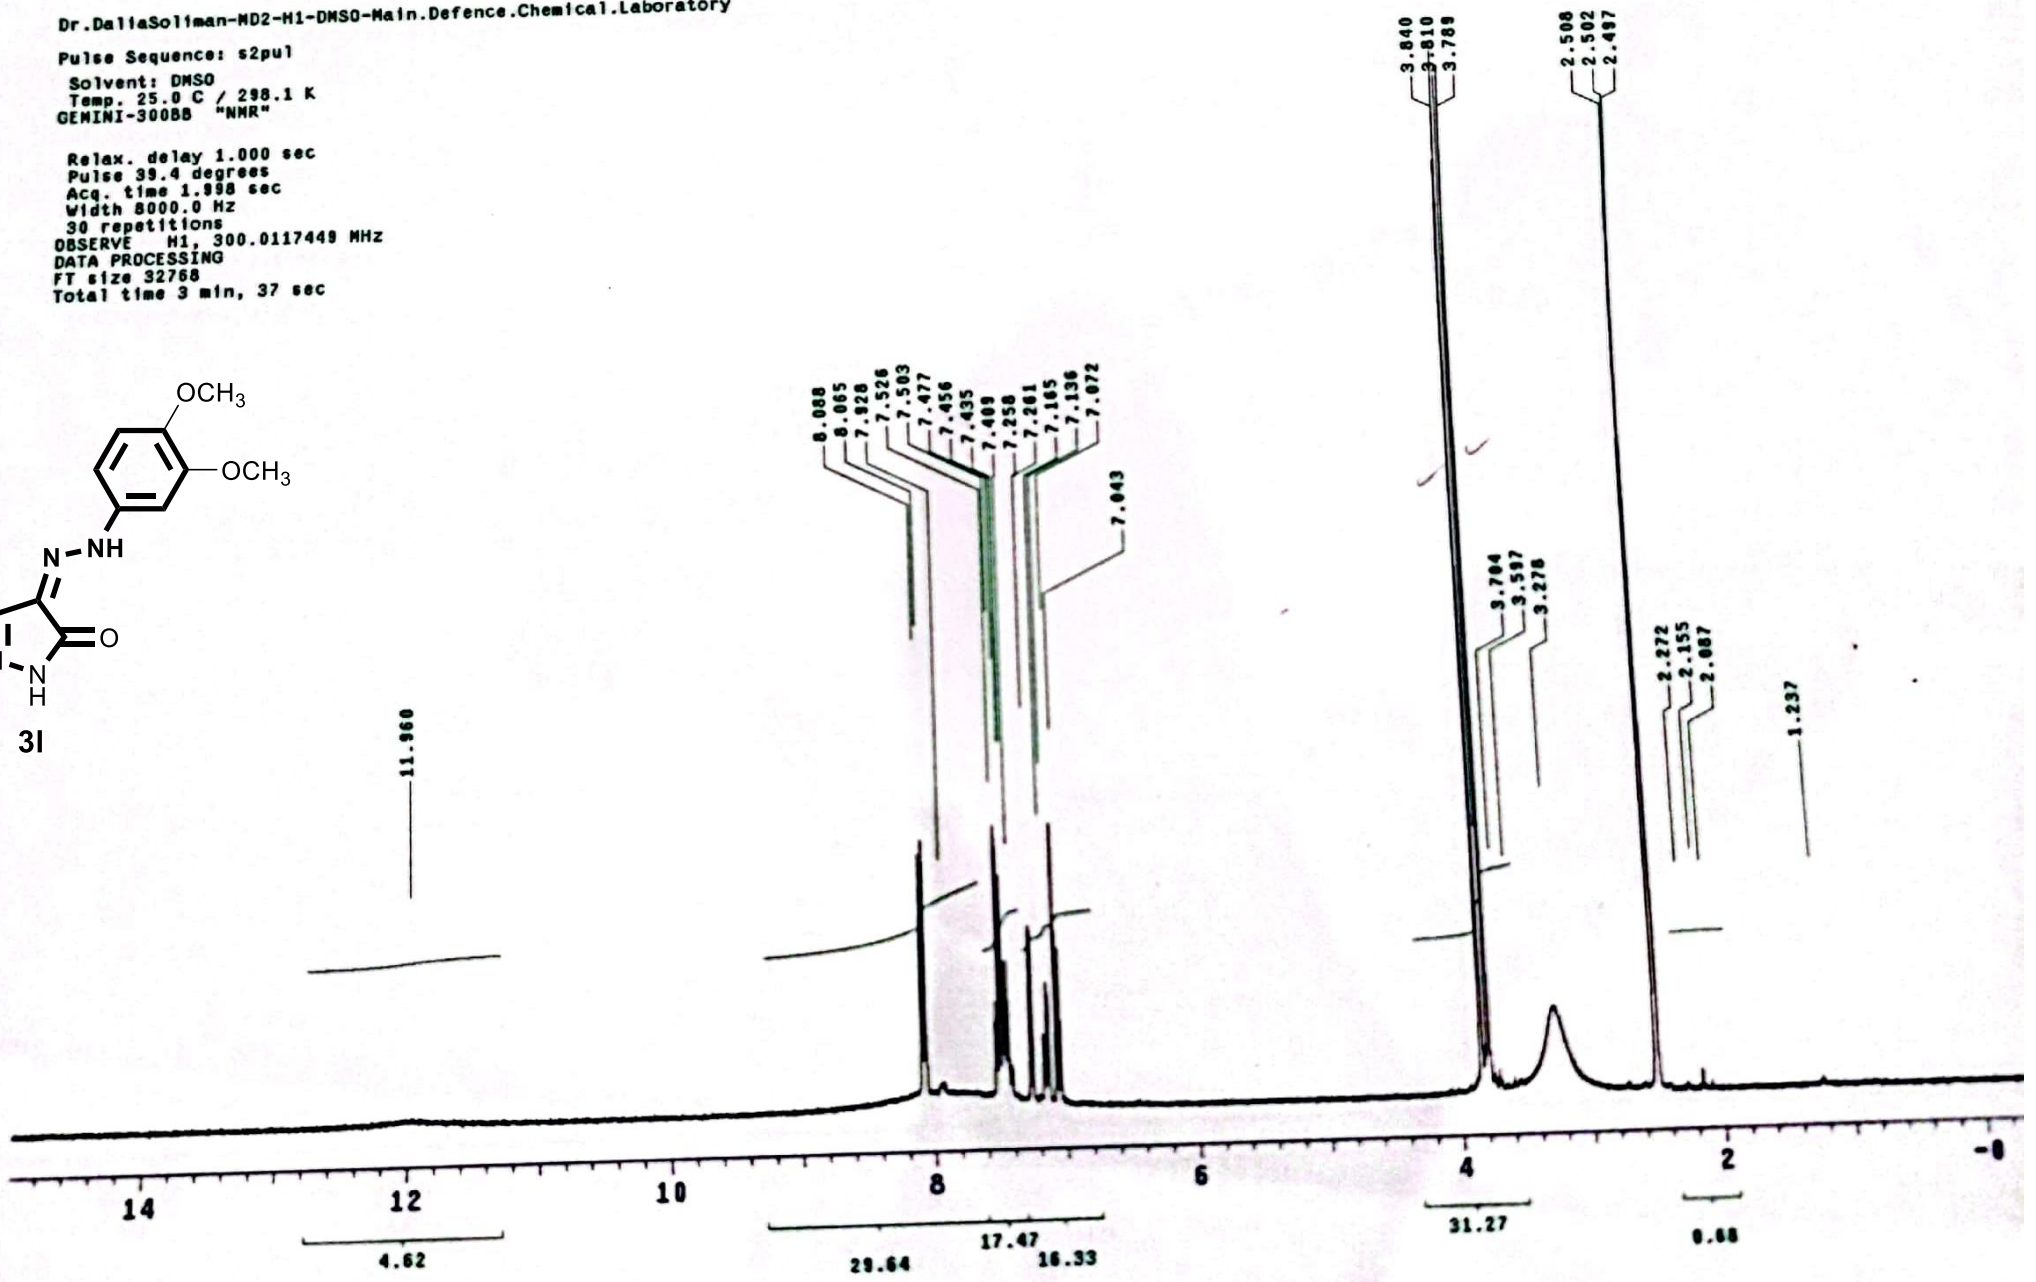

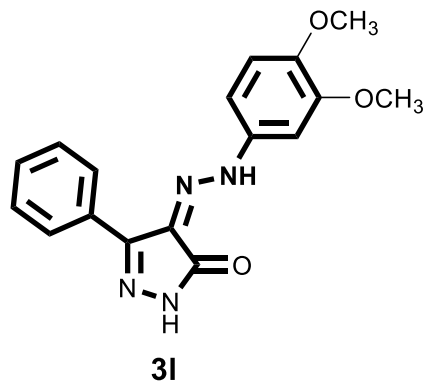

Peak Find - Memory-37

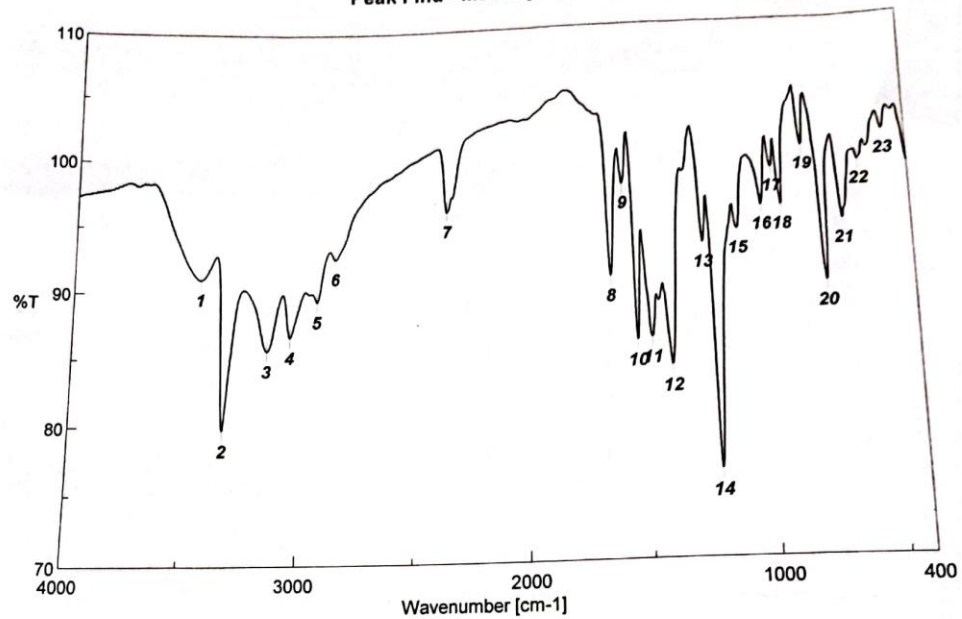

[Comments]  
 Sample name M.SD 2  
 Comment 12/12/2012  
 User IR  
 Division IR  
 Company Micro Analytical Center

Result of Peak Picking ]

| No. | Position | Intensity | No. | Position | Intensity | No. | Position | Intensity |
|-----|----------|-----------|-----|----------|-----------|-----|----------|-----------|
| 1   | 3439.42  | 90.9026   | 2   | 3325.64  | 79.7092   | 3   | 3141.47  | 85.4807   |
| 4   | 3042.16  | 86.4484   | 5   | 2927.41  | 89.0458   | 6   | 2849.31  | 92.228    |
| 7   | 2360.44  | 95.4371   | 8   | 1658.48  | 90.0128   | 9   | 1604.48  | 96.9844   |
| 10  | 1550.49  | 85.2869   | 11  | 1490.7   | 85.4495   | 12  | 1409.71  | 83.3804   |
| 13  | 1273.75  | 92.2371   | 14  | 1221.68  | 75.9868   | 15  | 1127.19  | 93.2243   |
| 16  | 1021.12  | 94.9852   | 17  | 970.983  | 97.8989   | 18  | 936.271  | 94.9693   |
| 19  | 836.955  | 99.5774   | 20  | 761.744  | 89.184    | 21  | 680.749  | 93.833    |
| 22  | 602.646  | 98.3362   | 23  | 493.688  | 100.607   |     |          |           |

Handwritten notes in Arabic script, including the number '31' and some chemical-related text.

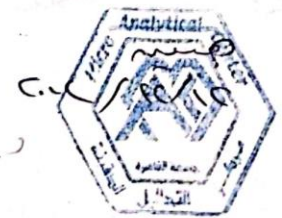

mai-adel-3h.2.fid

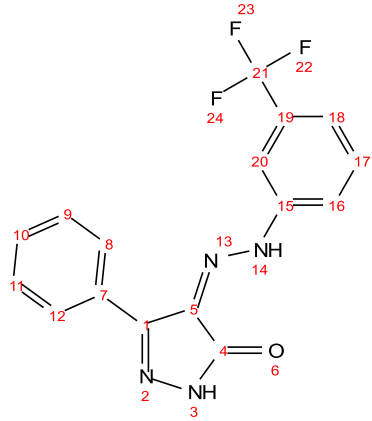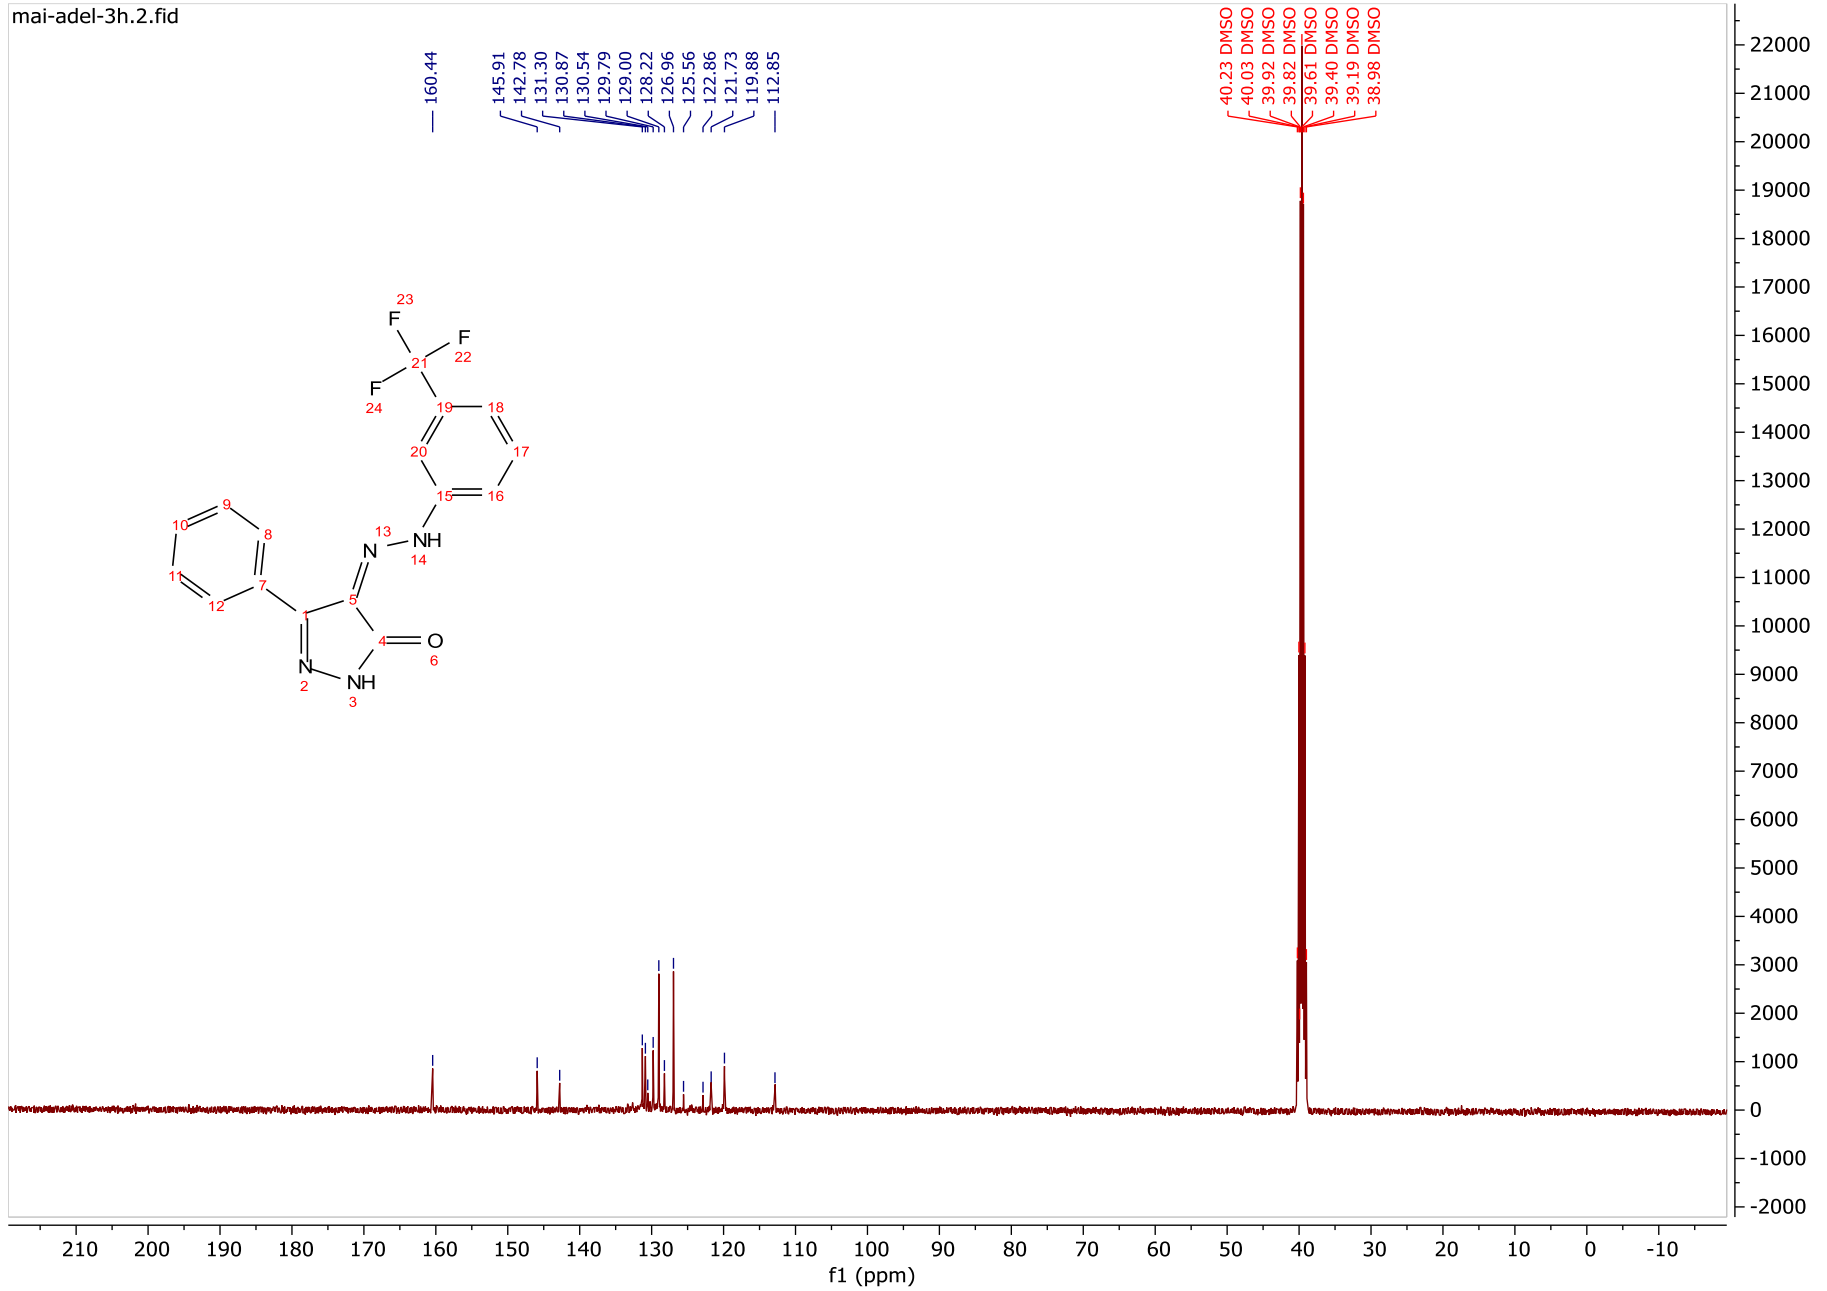



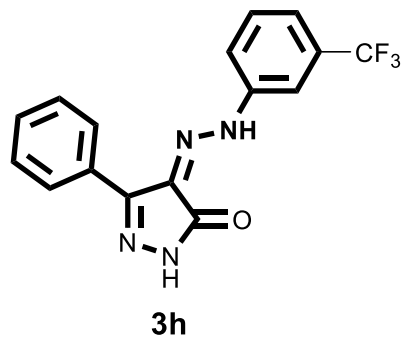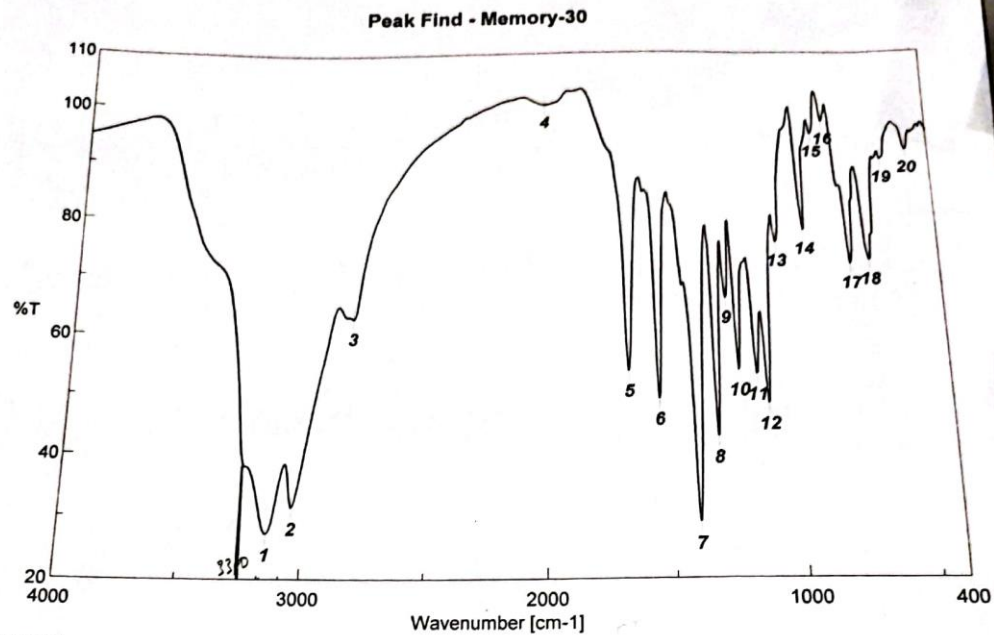

[Comments]  
 Sample name MSD3  
 Comment 12/12/2012  
 User IR  
 Division IR  
 Company Micro Analytical Center

Result of Peak Picking ]

| No. | Position | Intensity | No. | Position | Intensity | No. | Position | Intensity |
|-----|----------|-----------|-----|----------|-----------|-----|----------|-----------|
| 1   | 3142.44  | 27.1806   | 2   | 3043.12  | 31.2856   | 3   | 2814.6   | 62.0183   |
| 2   | 2017.18  | 99.9552   | 5   | 1675.84  | 52.5383   | 6   | 1556.27  | 47.8968   |
| 3   | 1405.85  | 28.5557   | 8   | 1327.75  | 41.7668   | 9   | 1283.39  | 64.3712   |
| 4   | 1240     | 52.4221   | 11  | 1168.65  | 51.6675   | 12  | 1126.22  | 46.9187   |
| 5   | 1066.44  | 74.0867   | 14  | 947.842  | 76.2686   | 15  | 889.023  | 94.1178   |
| 6   | 836.955  | 96.529    | 17  | 763.673  | 70.3229   | 18  | 683.642  | 71.0352   |
| 7   | 603.61   | 89.4393   | 20  | 492.723  | 91.2829   |     |          |           |

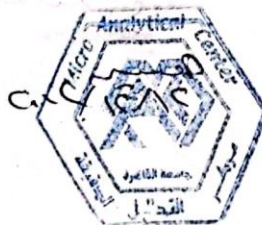

mai-adel-3h.1.fid

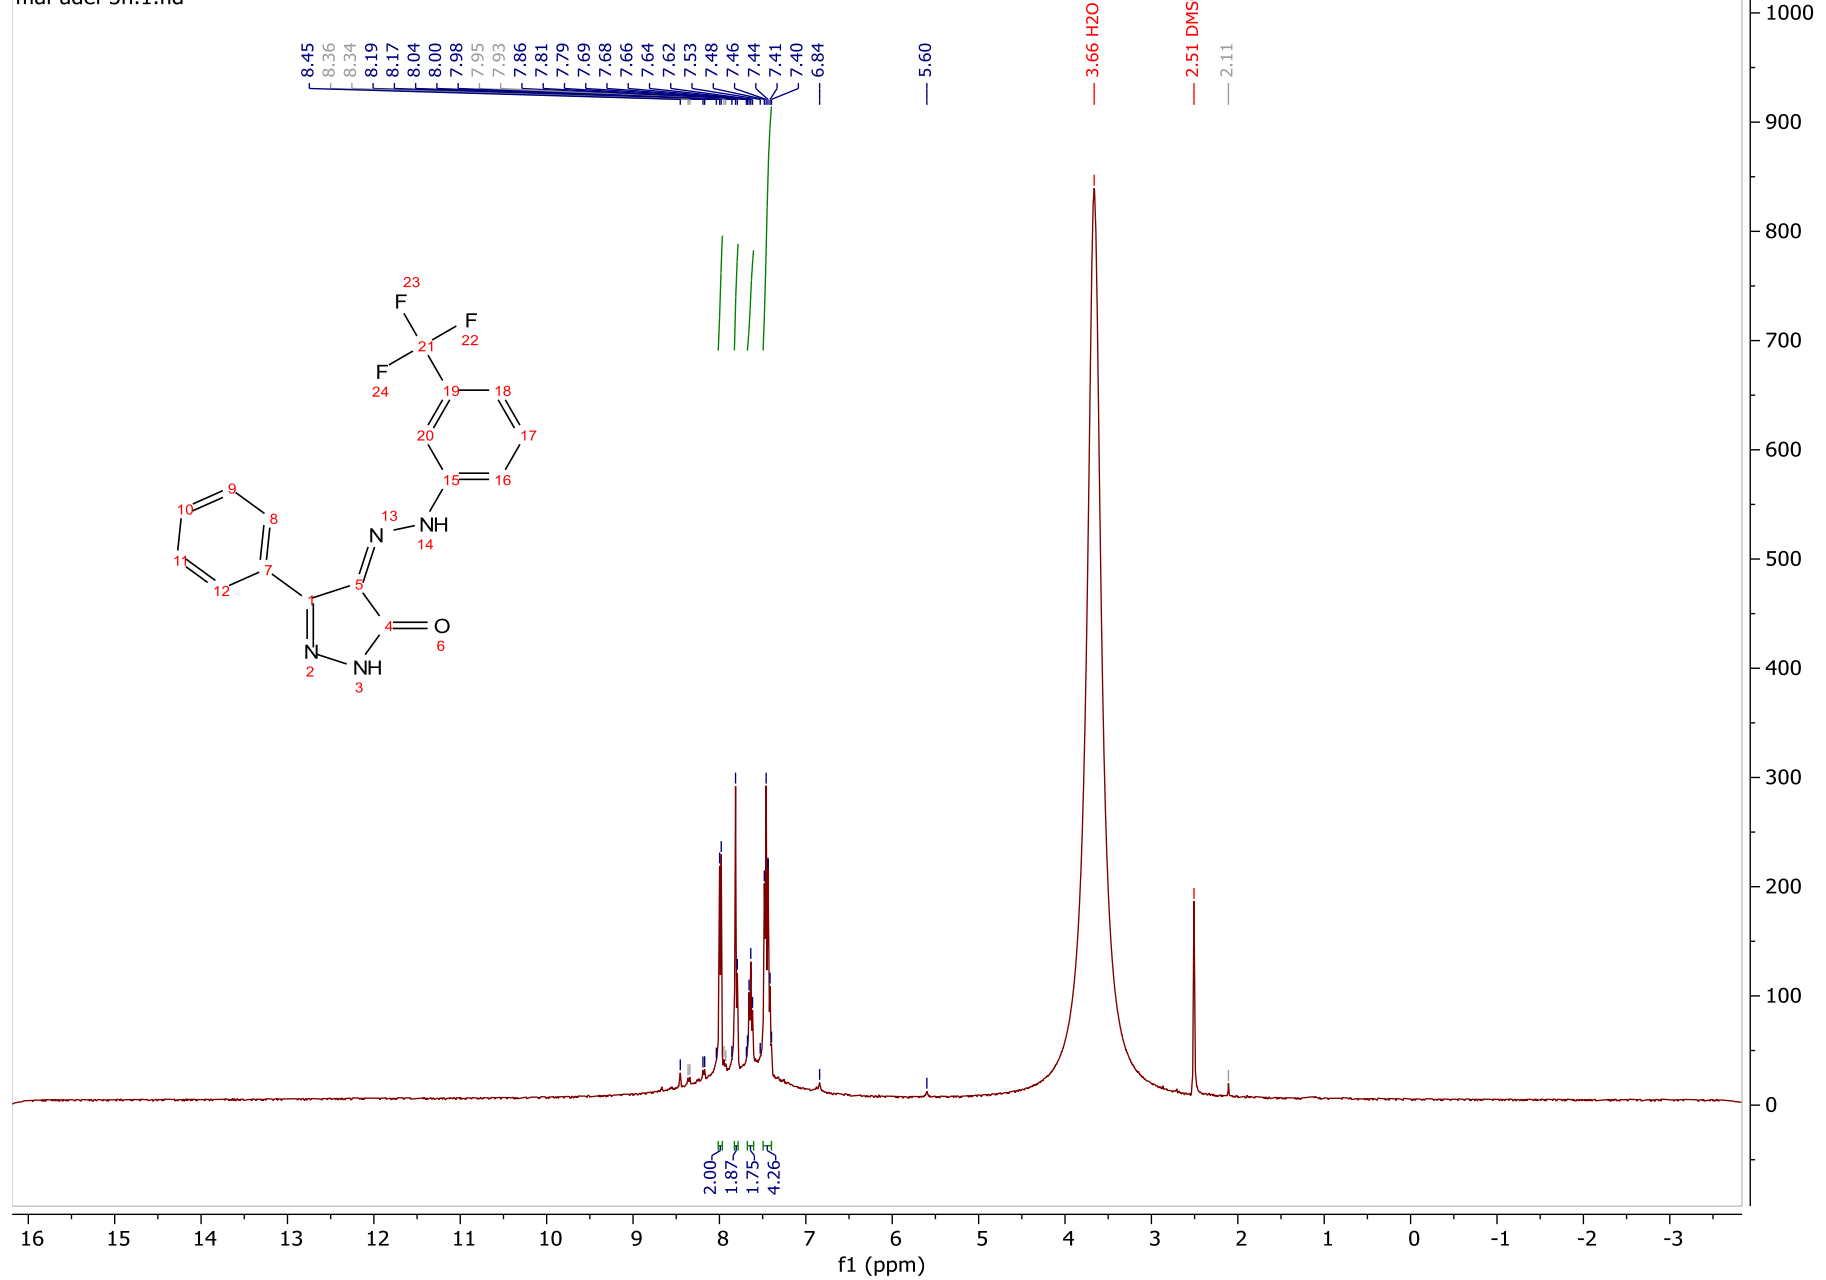



### **Docking study**

Automated docking studies were carried out using Glide (SP) scoring function Maestro10.1 Schrodinger, (2015-Release-4).

### **Ligand Preparation**

LigPrep module, was used for geometrical refining of chemical structures. LigPrep is intended to set up premium 3D structures with accurate chiralities. Original states of ionization were retained; tautomers and conformations were generated by the Monte Carlo method as implemented in MacroModel version 9.8, 2010, using OPLS-2005 force field. The generated conformers were subsequently minimized using truncated Newton conjugate gradient (TNCG) minimization up to 500 iterations. The conformers with an energy difference of 30 kcal/mol as compared to the global energy minimum conformer were retained. The conformational searches were carried out for aqueous solution using the generalized born/solvent accessible surface (GB/SA) continuum solvation model.

### **Protein Preparation.**

Protein preparation wizard of Maestro software was used for protein preparation. The selected chains were edited for missing hydrogens and for assigning proper bond orders. The H-bonds were optimized using sample orientations. All the polar hydrogens were displayed. All the crystallographic waters without hydrogen bond interactions with protein residues were removed. Finally, the non-hydrogen atoms of the protein structure was minimized to the default Root Mean Square Deviation (RMSD) value of 0.3.

### **Receptor Grid Generation.**

From the defined receptor, the co-crystallized ligand was separated from the active site of receptor chain. The atoms were of size equal to Van der Waals radii of 1.0 $\text{\AA}$  while the partial atomic charge was less than 0.25 defaults. The active site represents an enclosing box at the centroid of the workspace ligand. Following this protocol, a grid centered on the ligand was generated using the default Glide settings. All ligands were docked into this grid structure.

### **Molecular Docking Analysis.**

On a defined receptor grid, flexible docking was performed using the precision (SP) feature of Glide module, version 5.6, 2010. The constraints to defined ligand-receptor interactions were not set. The structure output format was set to pose viewer file so as to view the output of the resulting docking studies from pose viewer.

### Acknowledgements

In this work, docking studies were carried out using the Glide, Maestro10.1 Schrodinger, (2015-Release-4).

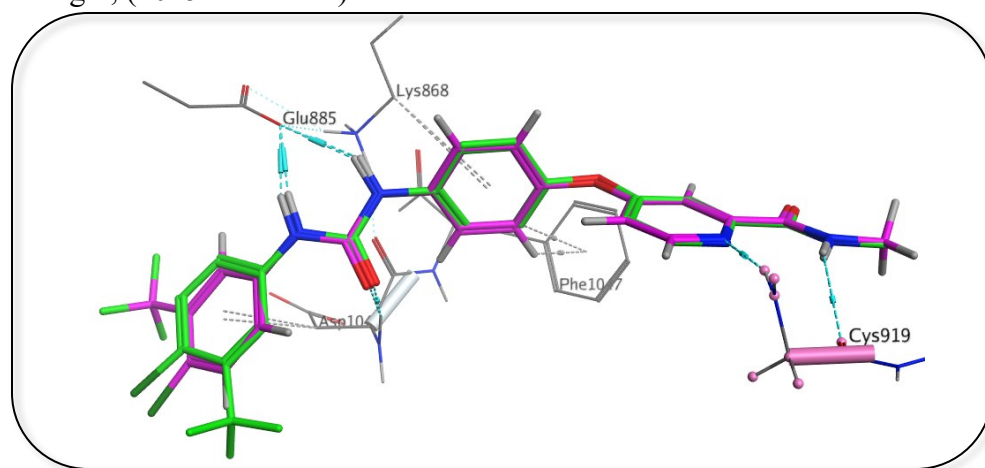

Figure S1 3D Representation of the superimposition of the docking pose (green) and the co-crystallized (purple) of sorafenib in the VEGFR-2 active site with RMSD of 0.21Å.

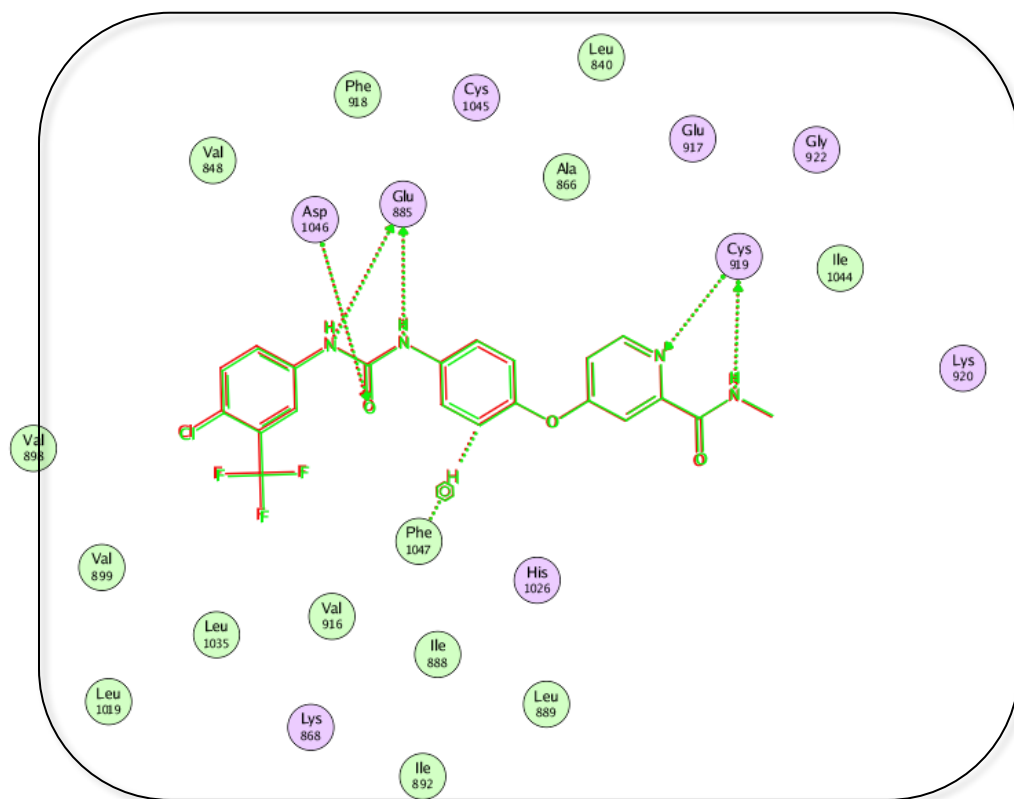

Figure S2 2D Representation of the superimposition of the docking pose (green) and the co-crystallized (purple) of sorafenib in the VEGFR-2 active site with RMSD of 0.21Å.

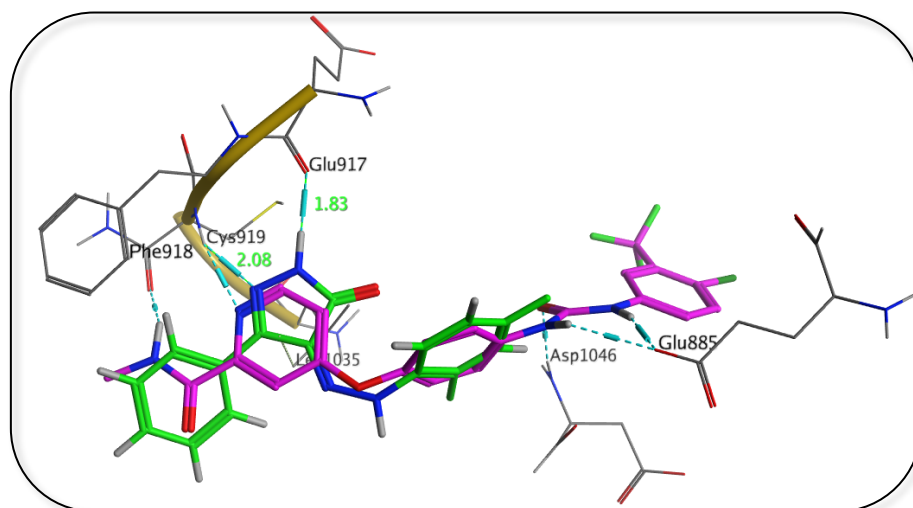

Figure S3 Superimposition of the docking pose of **3i** (green) and the co-crystallized (purple) of sorafenib in the VEGFR-2 active site.

## ***In Vivo* Assay**

### **Animals and tumor cell line**

Adult female Swiss albino mice purchased from Faculty of Pharmacy, Suez Canal University, Ismailia, Egypt, with an average body weight of (18-23) g was used. Mice were housed under constant conditions of 12 h light/dark cycle in a temperature under conditions of controlled humidity ( $22 \pm 2$  °C), with free access to standard laboratory mice food and water. All procedures related to care and maintenance of the animals were performed according to the international guiding principles for animal research and approved by Faculty of Science, Suez Canal University bioethics and animal ethics committee (Approval number REC107/2022).

Solid Ehrlich carcinoma (SEC) were got from the National Cancer Institute (Cairo University, Egypt). The tumor cell line was proliferated in mice through serial intraperitoneal (I.P.) transplantation of a volume of 0.2 mL physiological saline containing  $1 \times 10^6$  viable cells for 24 h. SEC cells were collected 7 days after I.P. implantation. The harvested cells were diluted with saline to obtain a concentration of  $5 \times 10^6$  viable SEC cells/mL. A volume of 0.2 mL saline contains  $1 \times 10^6$  SEC cells that were I.P. implanted into each normal mouse. SEC cells ( $1 \times 10^6$  tumor cells/mouse) were implanted subcutaneously into the right thigh of the hind limb.

The experimental animals were randomly divided into four groups. Group 1 served as the normal saline control. Group 2 served as the SEC control ( $1 \times 10^6$  cells/mouse). Group 3 served as the compound-treated group (6 mg/kg B.Wt., I.P.). Group 4 received the standard anticancer drug of Sorafenib (6 mg/kg BW, I.P.) and is considered as a reference control. Body weight and survival were recorded daily until the 24<sup>th</sup> day in both treated and control groups. At the end of experiment, anesthetized animals were then sacrificed for evaluation of the antitumor activity and histopathological examination.

### **Antitumor potentiality**

It includes tumor volume, weight, and tumor inhibition ration (TIR%). Time interval measurements of tumor volume using digital Vernier caliper (Tricle Brand, Shanghai, China). Measure tumor length and width using clipper and then calculate tumor volume using formulations  $V = (L \times W \times W)/2$ , where V is tumor volume, W is tumor width, L is tumor length. While TIR% was calculated according to the following equation  $\frac{Tumor\ volume\ (Control) - Tumor\ volume\ (treated)}{Tumor\ volume\ (control)} \times 100$ .

### **Histopathological study**

Specimens of liver-sacrificed mice were fixed in 10% saline formalin. The fixed liver specimens were dehydrated in ascending series of ethyl alcohol and embedded in paraffin. Sections at 5 mm thicknesses were stained with hematoxylin and eosin and examined under light microscopy

## References

- [1] M.S. Nafie, K. Arafa, N.K. Sedky, A.A. Alakhdar, R.K. Arafa, Triaryl dicationic DNA minor-groove binders with antioxidant activity display cytotoxicity and induce apoptosis in breast cancer, *Chemico-Biological Interactions*. 324 (2020) 109087. <https://doi.org/10.1016/j.cbi.2020.109087>.
- [2] M. Dicato, L. Plawny, M. Diederich, Anemia in cancer, *Annals of Oncology*. 21 (2010) vii167–vii172. <https://doi.org/10.1093/annonc/mdq284>.
- [3] H.S.A. ElZahabi, M.S. Nafie, D. Osman, N.H. Elghazawy, D.H. Soliman, A.A.H. EL-Helby, R.K. Arafa, Design, synthesis and evaluation of new quinazolin-4-one derivatives as apoptotic enhancers and autophagy inhibitors with potent antitumor activity, *European Journal of Medicinal Chemistry*. 222 (2021) 113609. <https://doi.org/10.1016/j.ejmech.2021.113609>.
- [4] A.T.A. Boraie, E.H. Eltamany, I.A.I. Ali, S.M. Gebriel, M.S. Nafie, Synthesis of new substituted pyridine derivatives as potent anti-liver cancer agents through apoptosis induction: In vitro, in vivo, and in silico integrated approaches, *Bioorganic Chemistry*. 111 (2021) 104877. <https://doi.org/10.1016/j.bioorg.2021.104877>.
